# Supplementary material for: Ultrasonic assisted dimeric cinchona based chiral phase transfer catalysts for highly enanatioselective synthesis of epoxidation of α,β-unsaturated ketones
Source: Royal Society of Chemistry journal article supplement (doi:10.1039/c4ra10952j), 2014-01-01
Supplement: c4ra10952j1.pdf [file c4ra10952j1.pdf]

*Supporting Information*

---

---

**Ultrasonic Assisted Dimeric Cinchona based Chiral Phase Transfer Catalysts for Highly Enantioselective Synthesis of Epoxidation of  $\alpha$ ,  $\beta$ -Unsaturated Ketones**

**Jayaraman Sivamani, Veeramanoharan Ashokkumar, Velu Sadhasivam, Kumaraguru Duraimurugan, and Ayyanar Siva\***

Department of Inorganic Chemistry, School of Chemistry, Madurai Kamaraj University,  
Madurai-625 021, Tamilnadu, India.

Corresponding author : drasiva@gmail.com; ptc\_siva@yahoo.co.in

**Table 1** The asymmetric epoxidation of chalcone **3** under various conditions with CMPTCs (**10**) and NaOCl in toluene.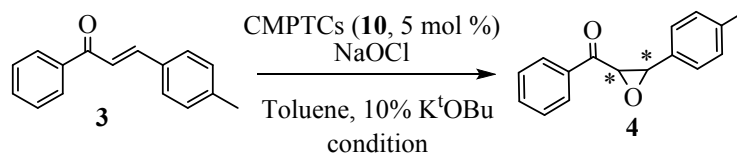

| Entry | Condition       | Catalyst | Time (h) | Yield (%) <sup>a</sup> | % of ee <sup>b</sup> (Abs.Conf.) <sup>c</sup> |
|-------|-----------------|----------|----------|------------------------|-----------------------------------------------|
| 1     | Ultrasonication | 10a      | 1.0      | 99                     | 81 (2 <i>S</i> ,3 <i>R</i> )                  |
| 2     | Ultrasonication | 10b      | 1.0      | 96                     | 79 (2 <i>S</i> ,3 <i>R</i> )                  |
| 3     | 10°C            | 10a      | 5.0      | 65                     | 67 (2 <i>S</i> ,3 <i>R</i> )                  |
| 4     | 10°C            | 10b      | 5.0      | 63                     | 65 (2 <i>S</i> ,3 <i>R</i> )                  |
| 5     | -10°C           | 10a      | 10.0     | 52                     | 64 (2 <i>S</i> ,3 <i>R</i> )                  |
| 6     | -10°C           | 10b      | 10.0     | 51                     | 59 (2 <i>S</i> ,3 <i>R</i> )                  |

<sup>a</sup> Isolated yield of purified materials.

<sup>b</sup> Enantiomeric excess of **4** was determined by HPLC analysis using a chiral column (Phenomenex Chiralpack) with hexane-IPA as a solvent.

<sup>c</sup> The absolute configuration of **4** was determined to be (2*S*,3*R*) by comparison with the HPLC retention time using known standard.<sup>1</sup>

## Reference

1 Shigeru Arai, Hiroki Tsuge, and Takayuki Shioiri, *Tetrahedron Lett.* 1998, **39**, 7563.

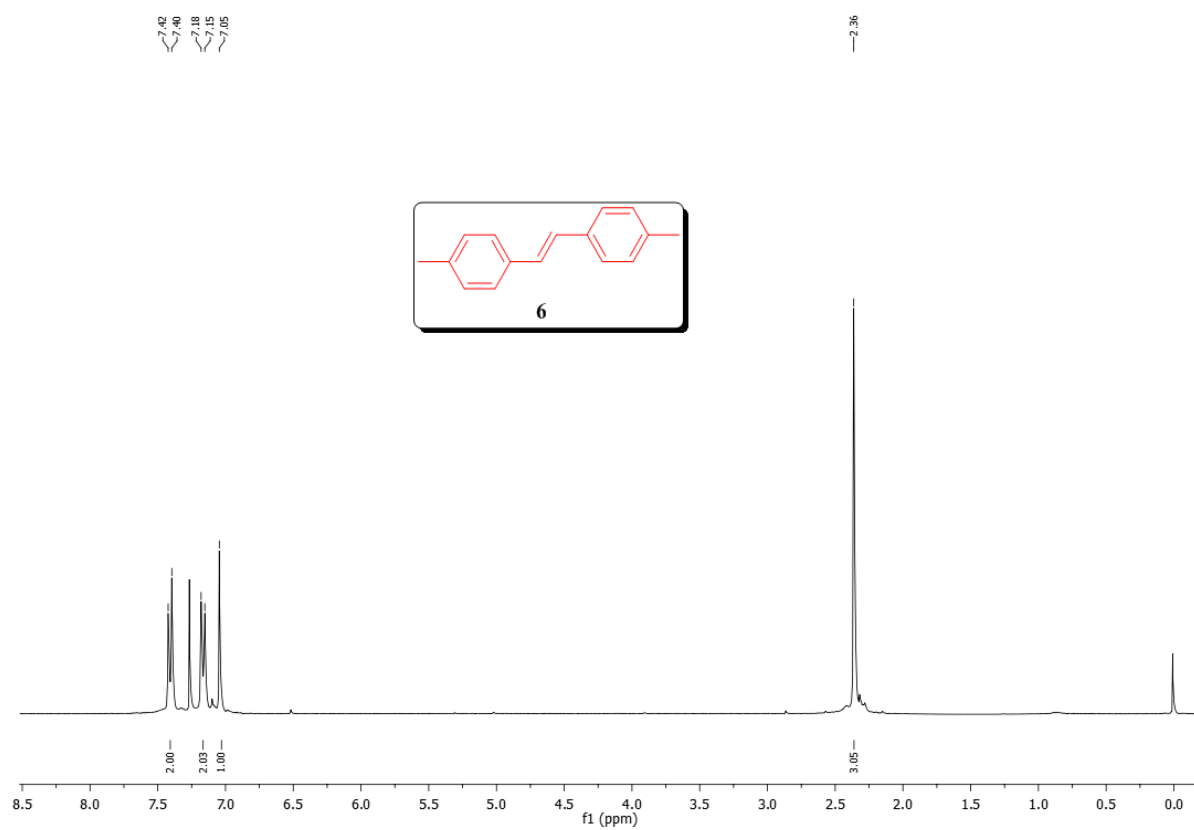

S 1:  $^1\text{H}$  NMR Spectrum of (*E*)-4,4-Dimethylstilbene (6).

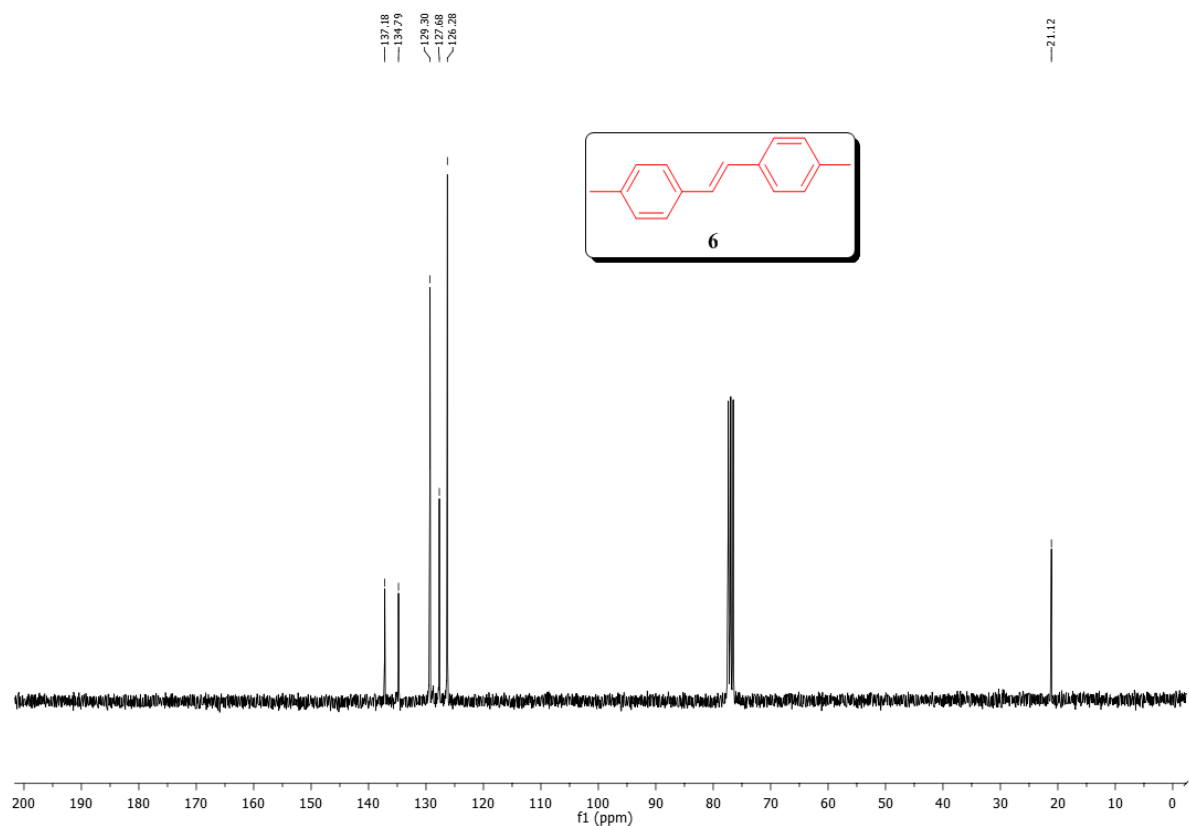

S 2:  $^{13}\text{C}$  NMR Spectrum of (*E*)-4,4-Dimethylstilbene (6).

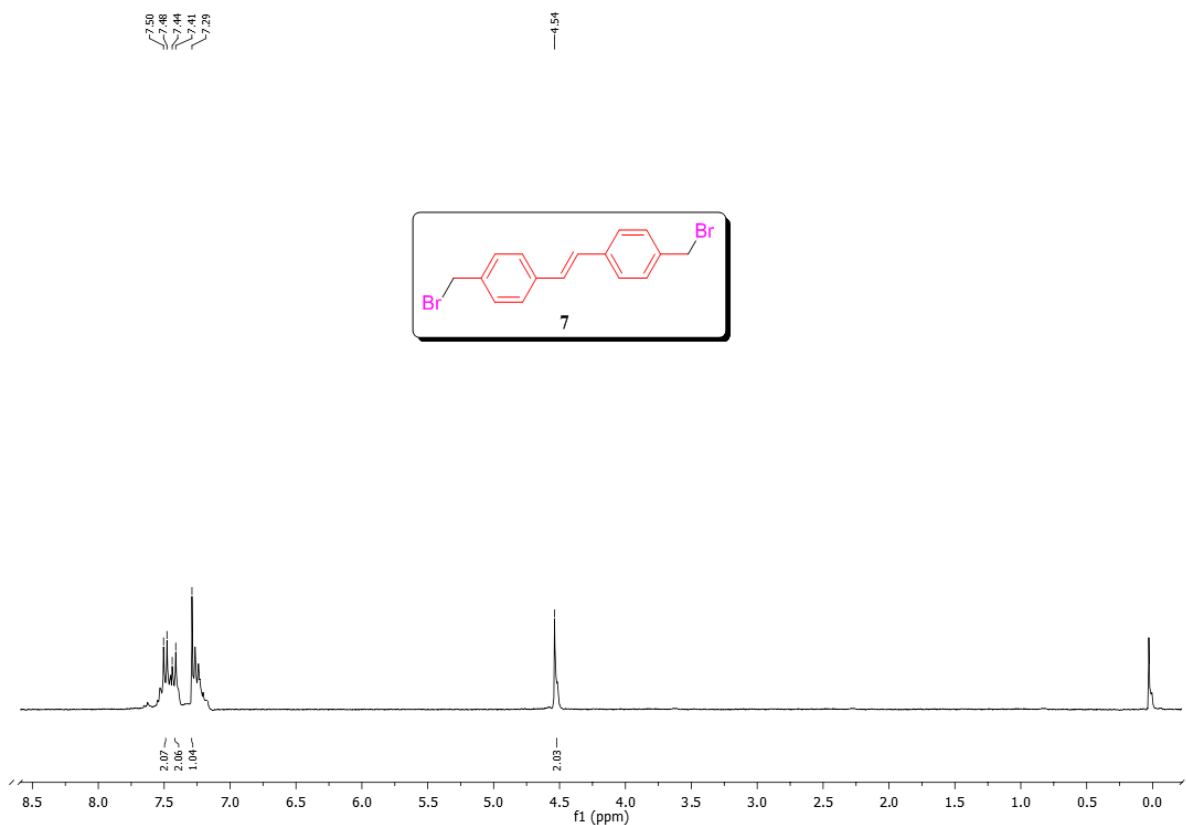

S 3: <sup>1</sup>H NMR Spectrum of (E)-4,4-bis(bromomethyl)stilbene (7).

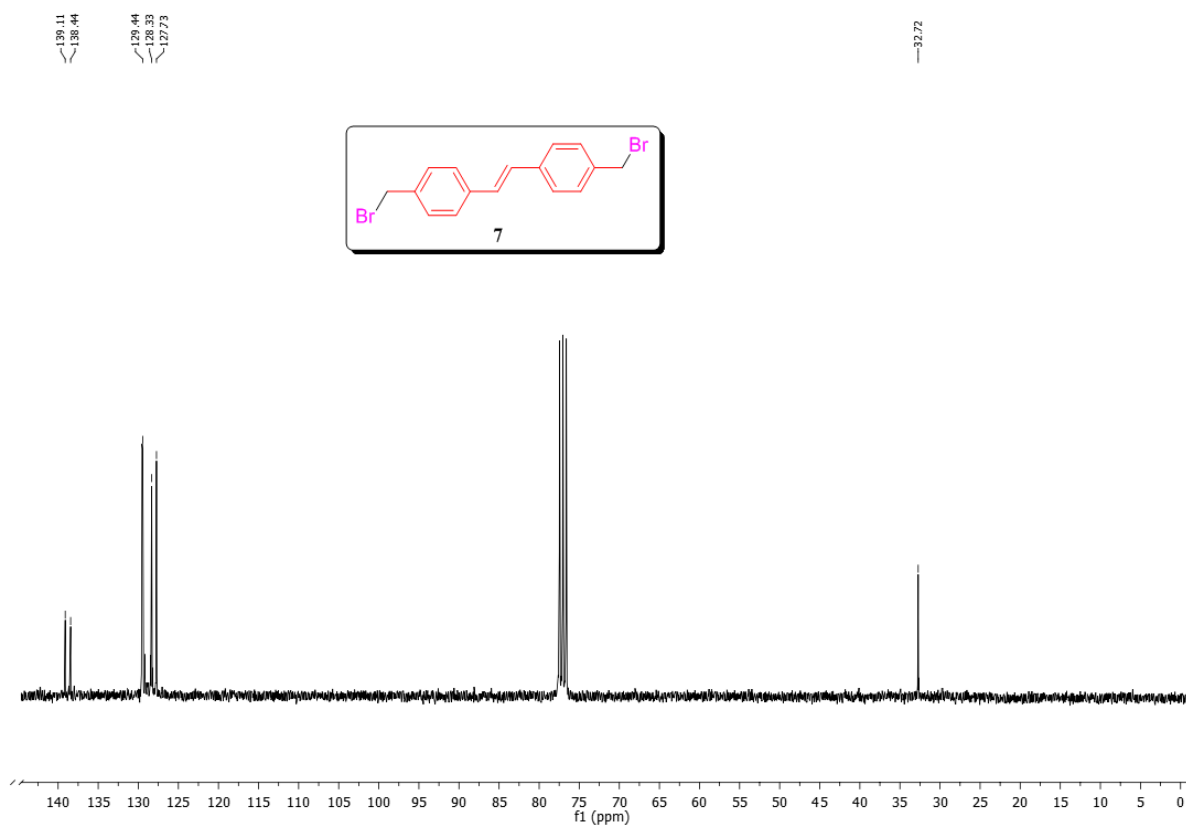

S 4: <sup>13</sup>C NMR Spectrum of (E)-4,4-bis(bromomethyl)stilbene (7).

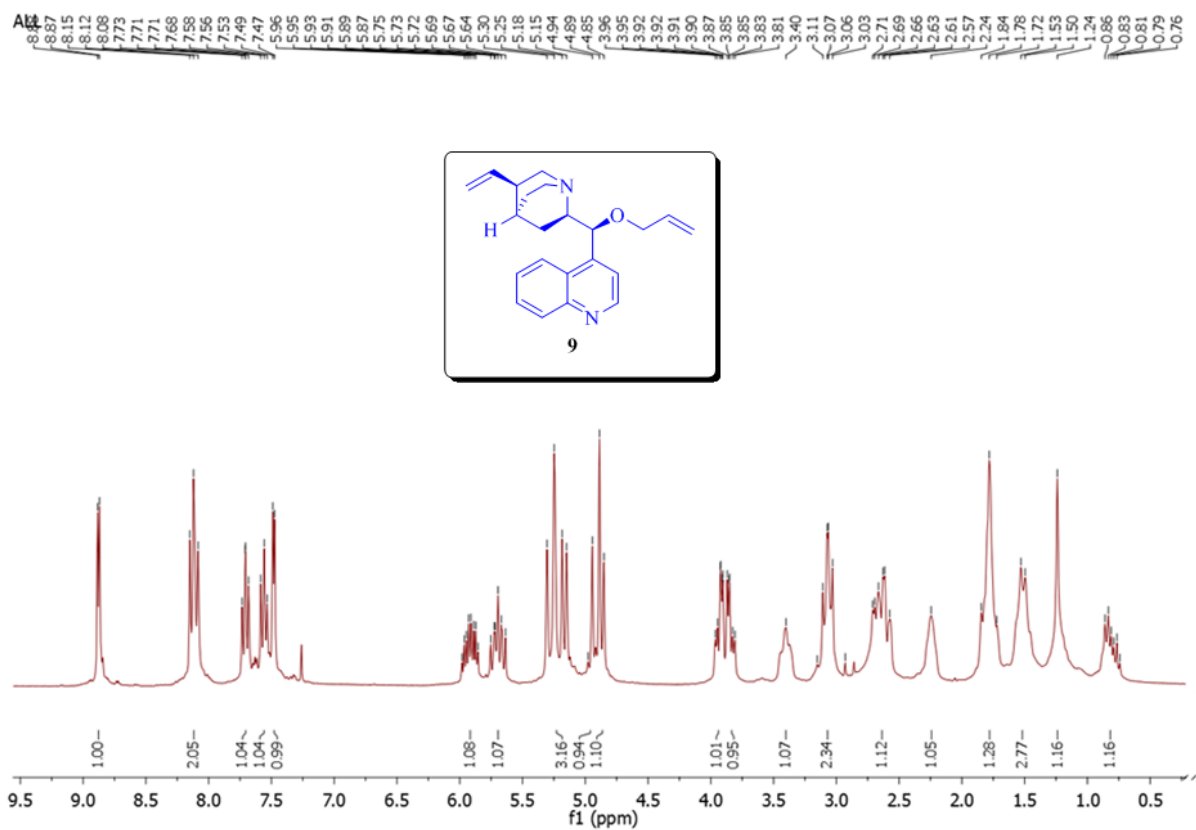

S 5:  $^1\text{H}$  NMR Spectrum of *O*- Allylcinchonine (9).

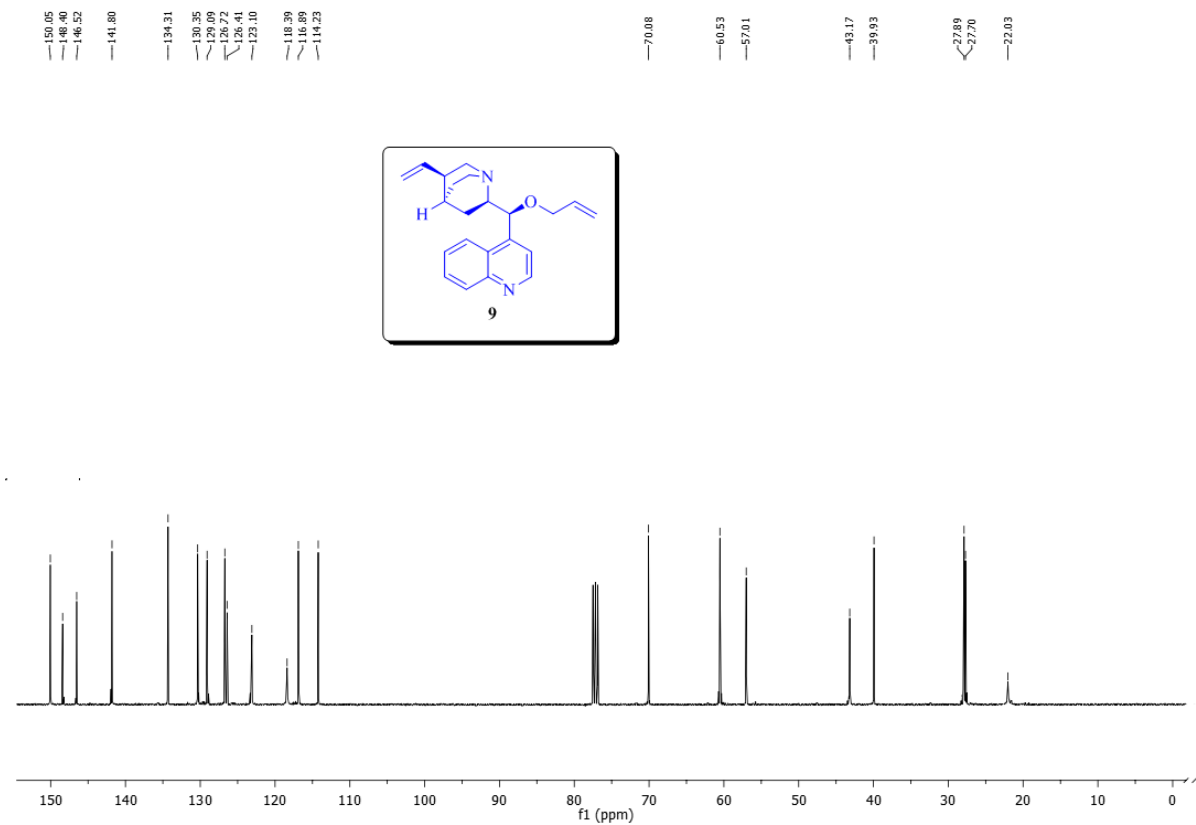

S 6:  $^{13}\text{C}$  NMR Spectrum of *O*- Allylcinchonine (9).

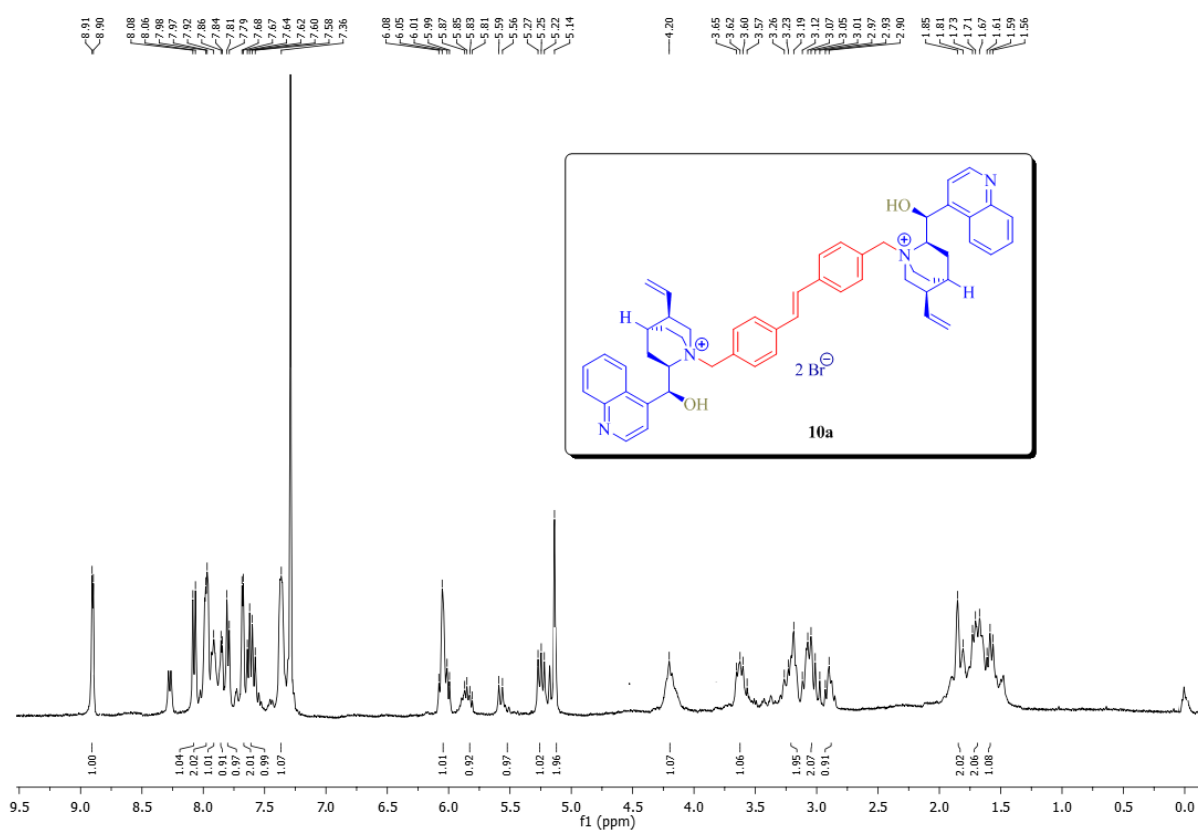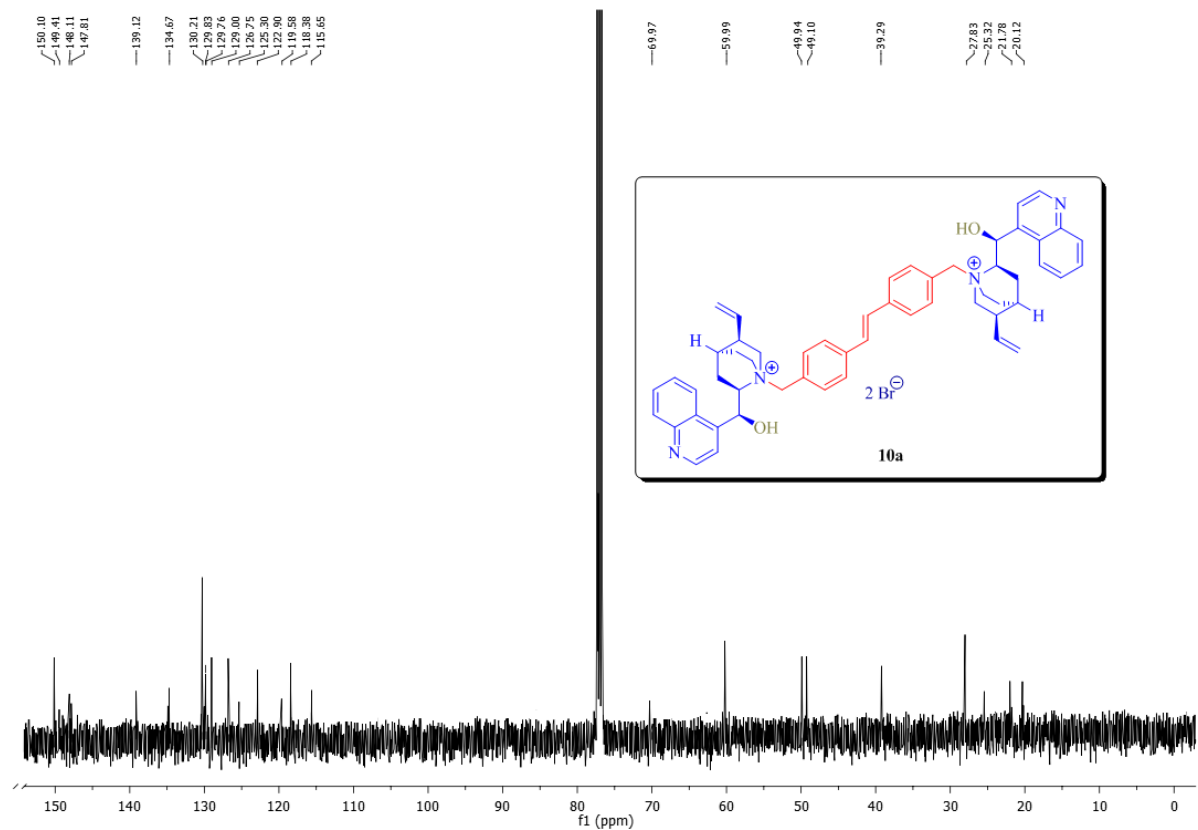

## Supporting Information

SC\_141017221503 #5 RT: 0.06 AV: 1 NL: 4.98E1  
T: FTMS + c ESI Full ms [200.00-1500.00]

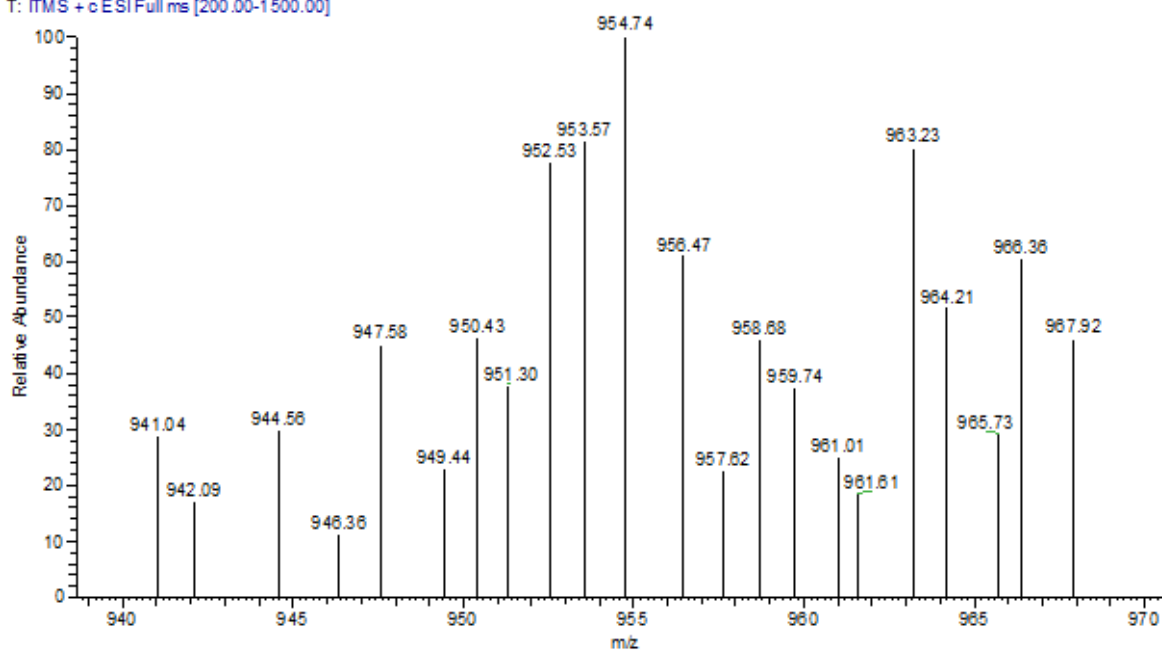

**S 9: ESI - Mass Spectrum of Cinchonine (contains free -OH) based CMPTC (10a).**

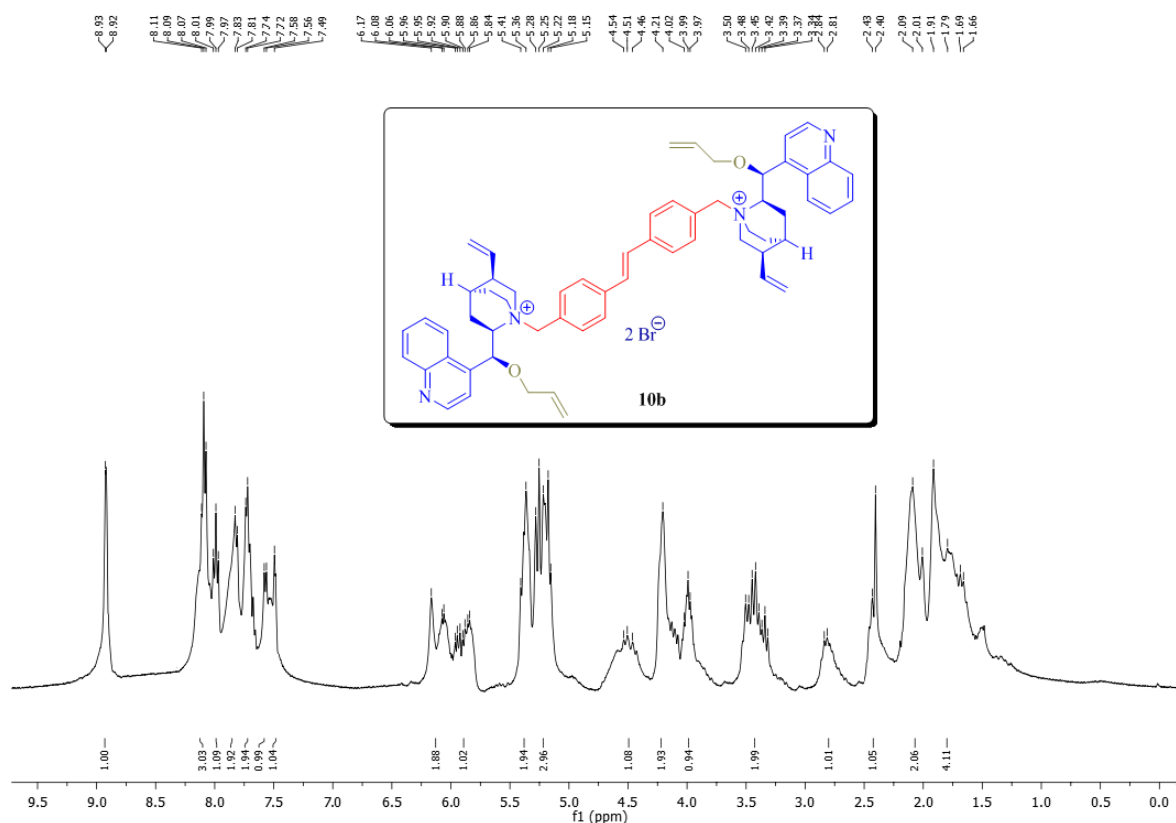

**S 10: <sup>1</sup>H NMR Spectrum of Allylated cinchonine based CMPTC (10b).**

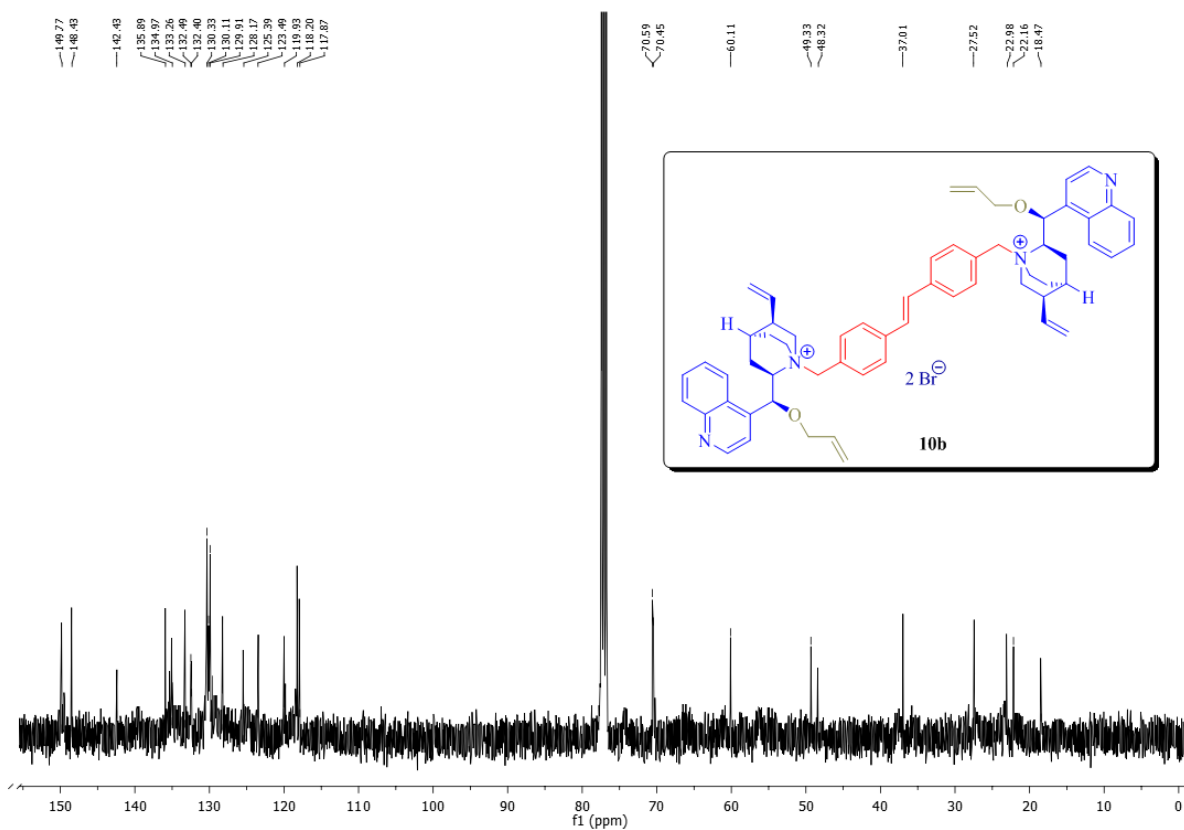

S 11: <sup>13</sup>C NMR Spectrum of Allylated cinchonine based CMPTC (10b).

SPC #27 RT: 0.37 AV: 1 NL: 1.90E2  
T: ITMS + c ESI Full ms [200.00-1500.00]

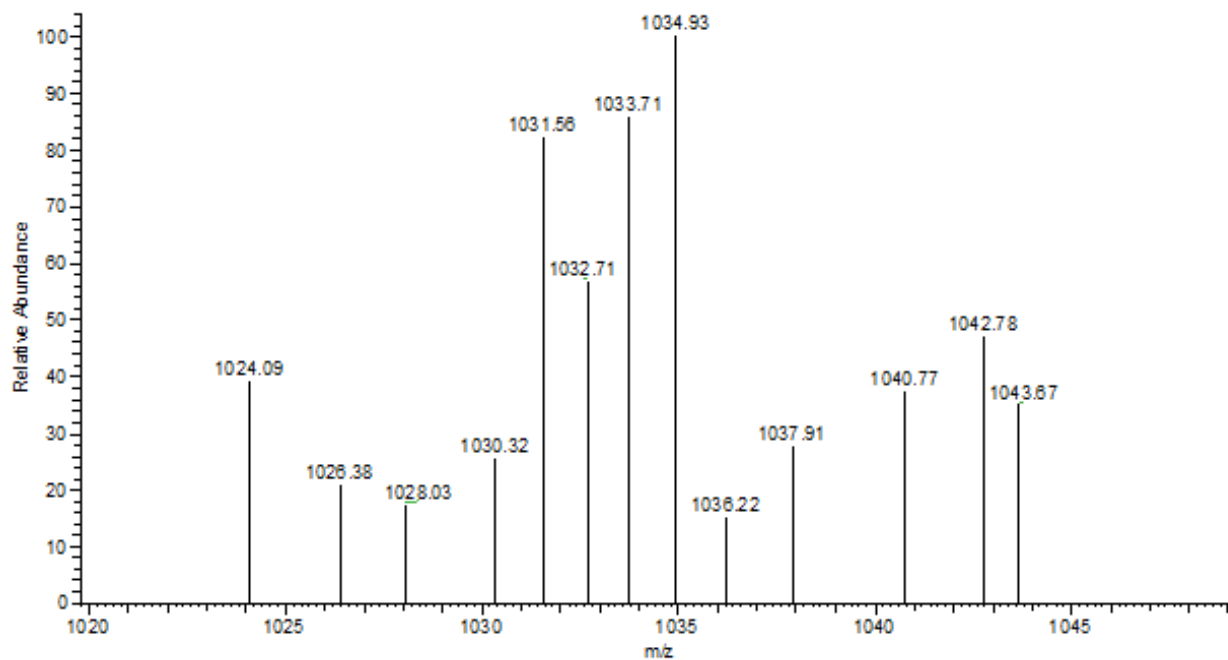

S 12: ESI - Mass Spectrum of Allylated cinchonine based CMPTC (10b).



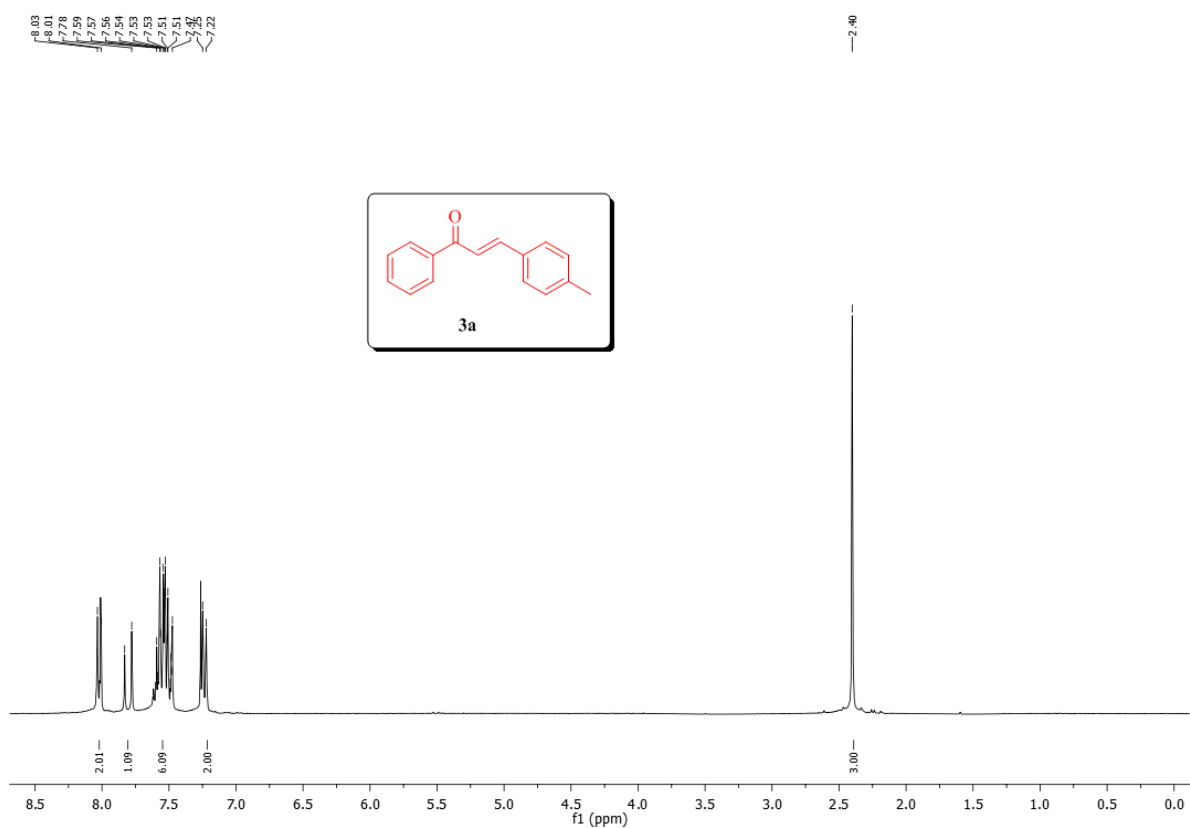

**S 13: <sup>1</sup>H NMR Spectrum of (*E*)-1-phenyl-3-*p*-tolylprop-2-en-1-one (3a).**

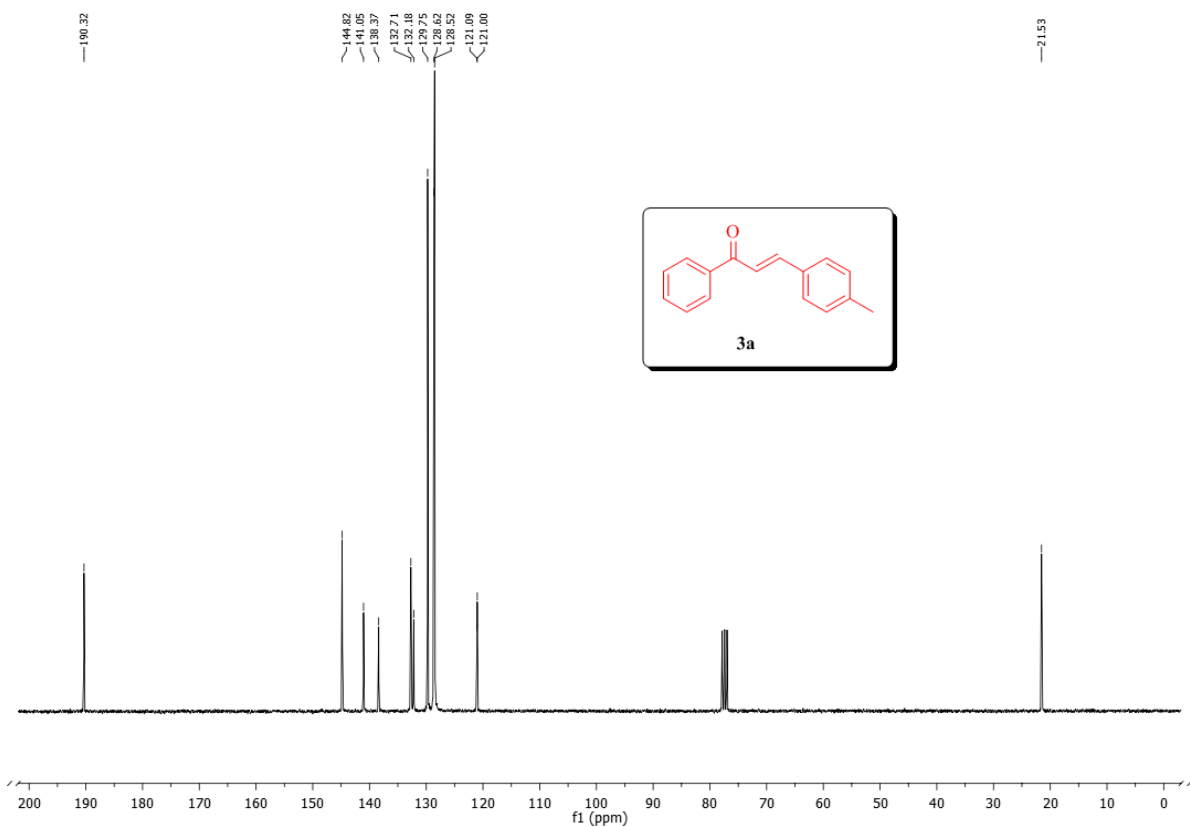

**S 14: <sup>13</sup>C NMR Spectrum of (*E*)-1-phenyl-3-*p*-tolylprop-2-en-1-one(3a).**

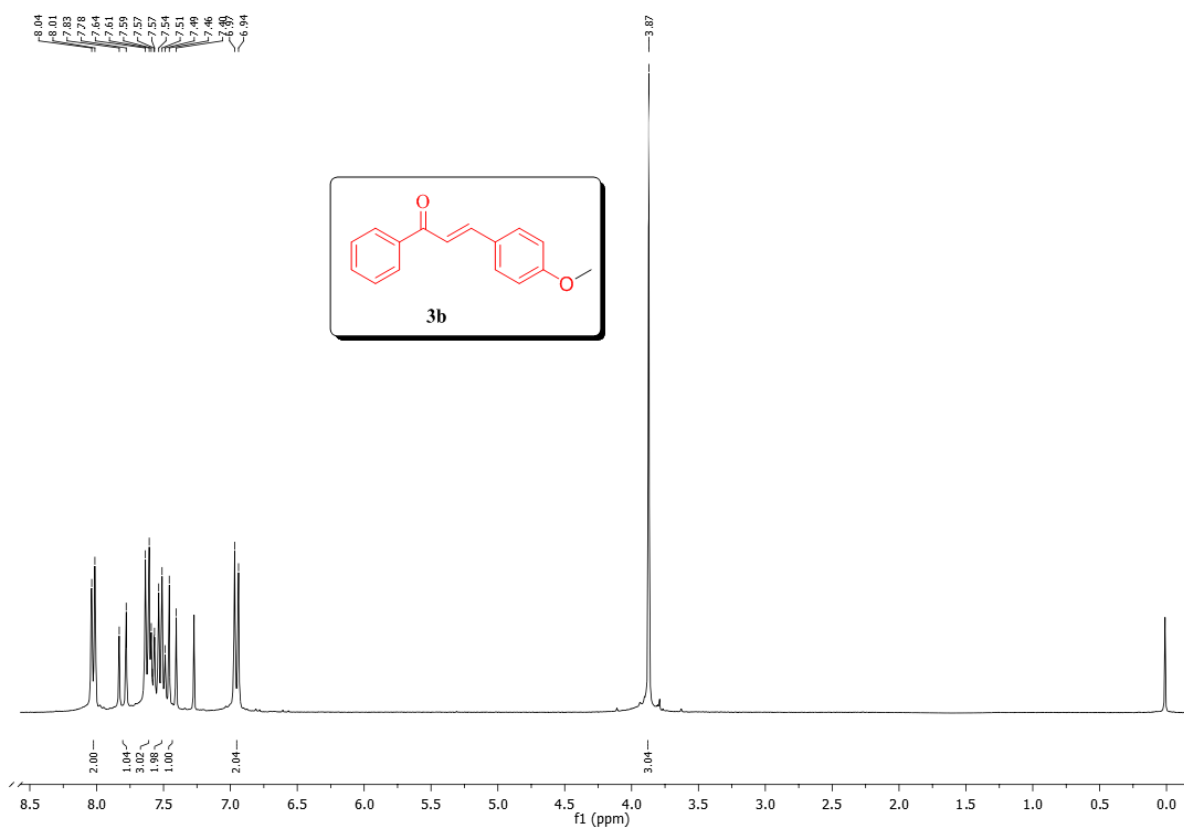

**S 15: <sup>1</sup>H NMR Spectrum of (*E*)-3-(4-methoxyphenyl)-1-phenylprop-2-en-1-one (3b).**

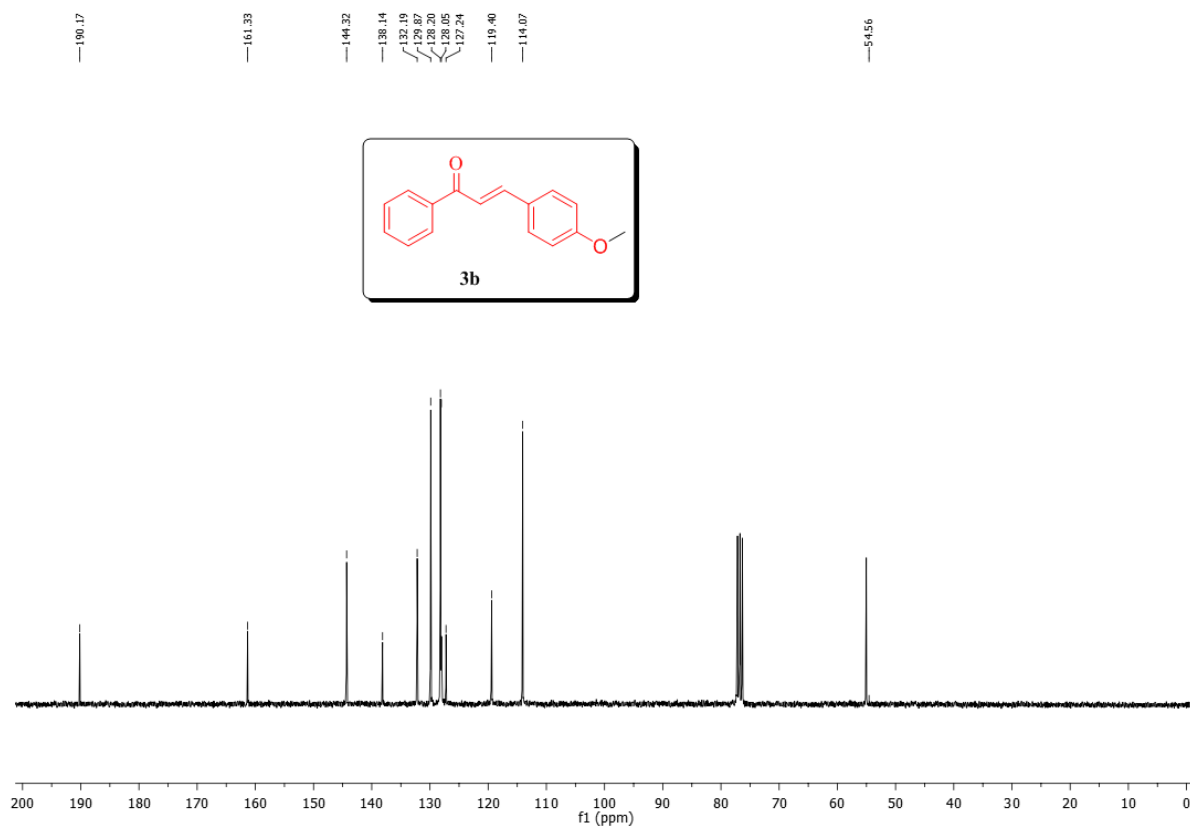

**S 16: <sup>13</sup>C NMR Spectrum of (*E*)-3-(4-methoxyphenyl)-1-phenylprop-2-en-1-one (3b).**

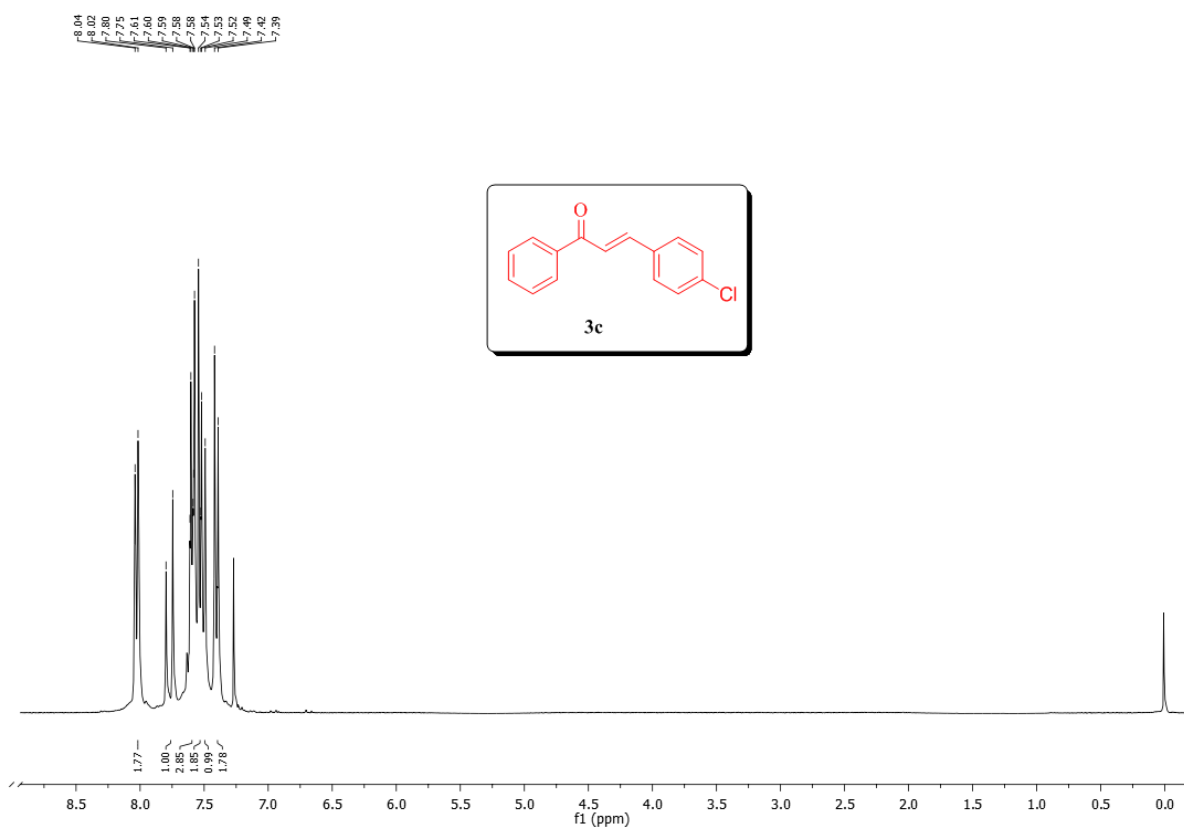

**S 17: <sup>1</sup>H NMR Spectrum of (*E*)-3-(4-chlorophenyl)-1-phenylprop-2-en-1-one (3c).**

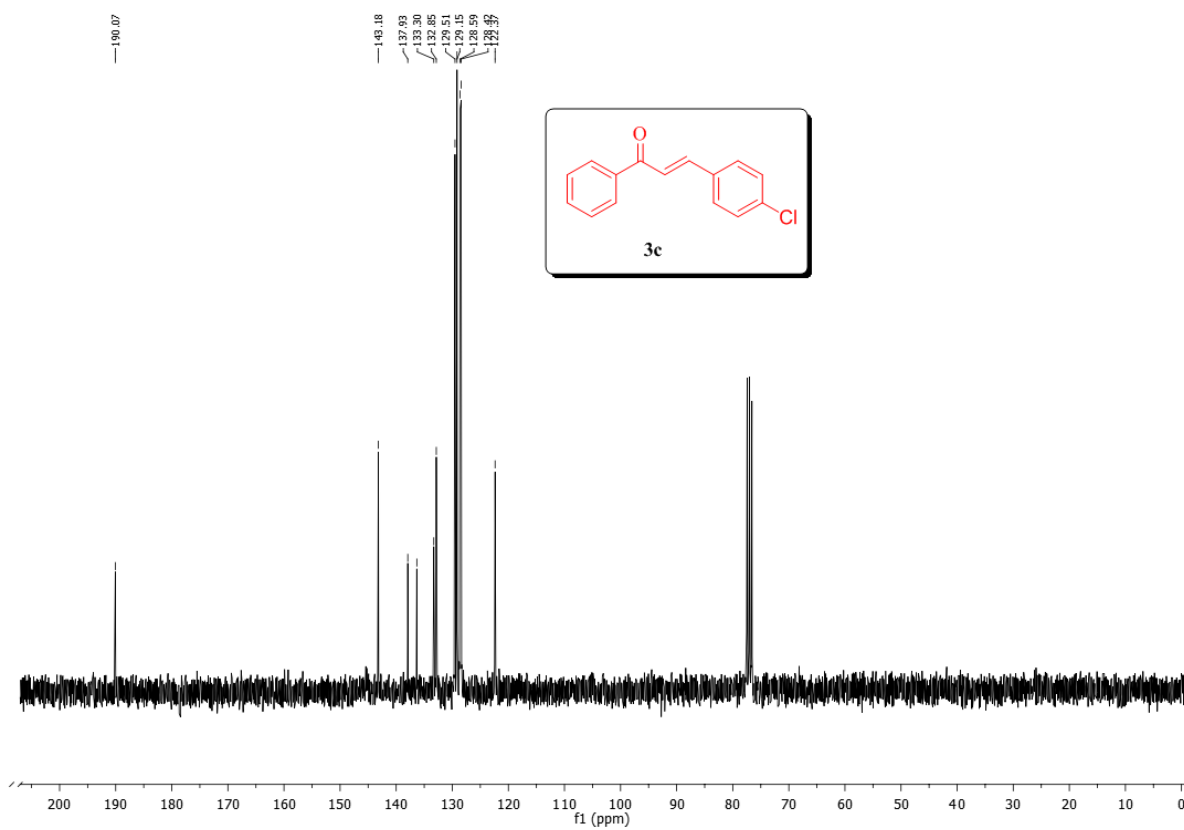

**S 18: <sup>13</sup>C NMR Spectrum of (*E*)-3-(4-chlorophenyl)-1-phenylprop-2-en-1-one (3c).**

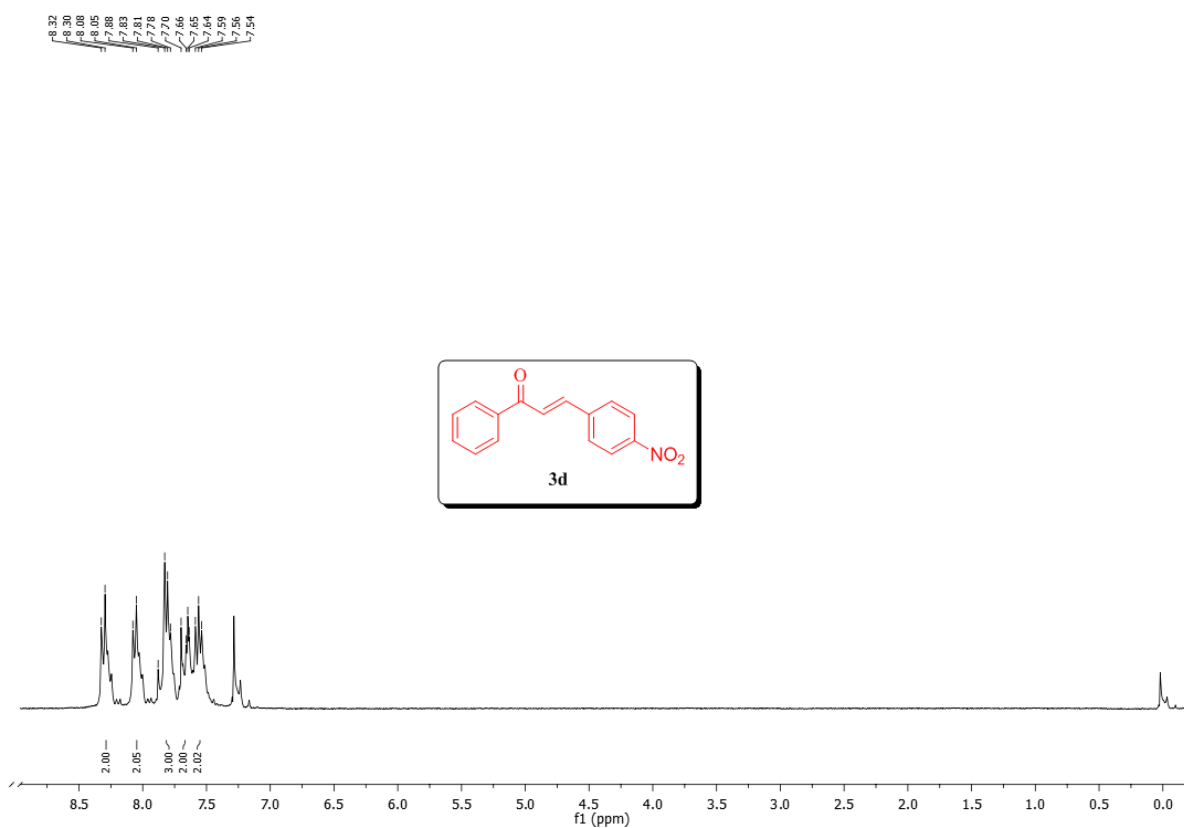

**S 19:** <sup>1</sup>H NMR Spectrum of (*E*)-3-(4-nitrophenyl)-1-phenylprop-2-en-1-one (**3d**).

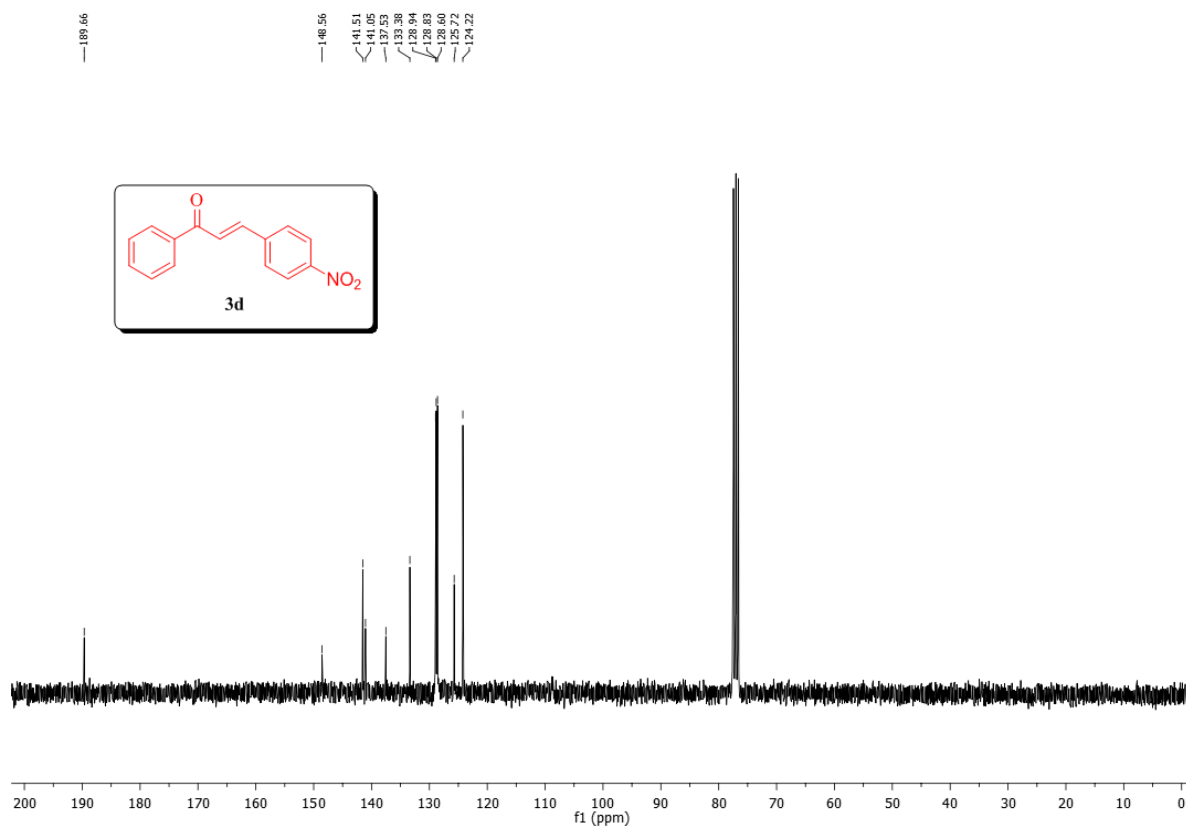

**S 20:** <sup>13</sup>C NMR Spectrum of (*E*)-3-(4-nitrophenyl)-1-phenylprop-2-en-1-one (**3d**).

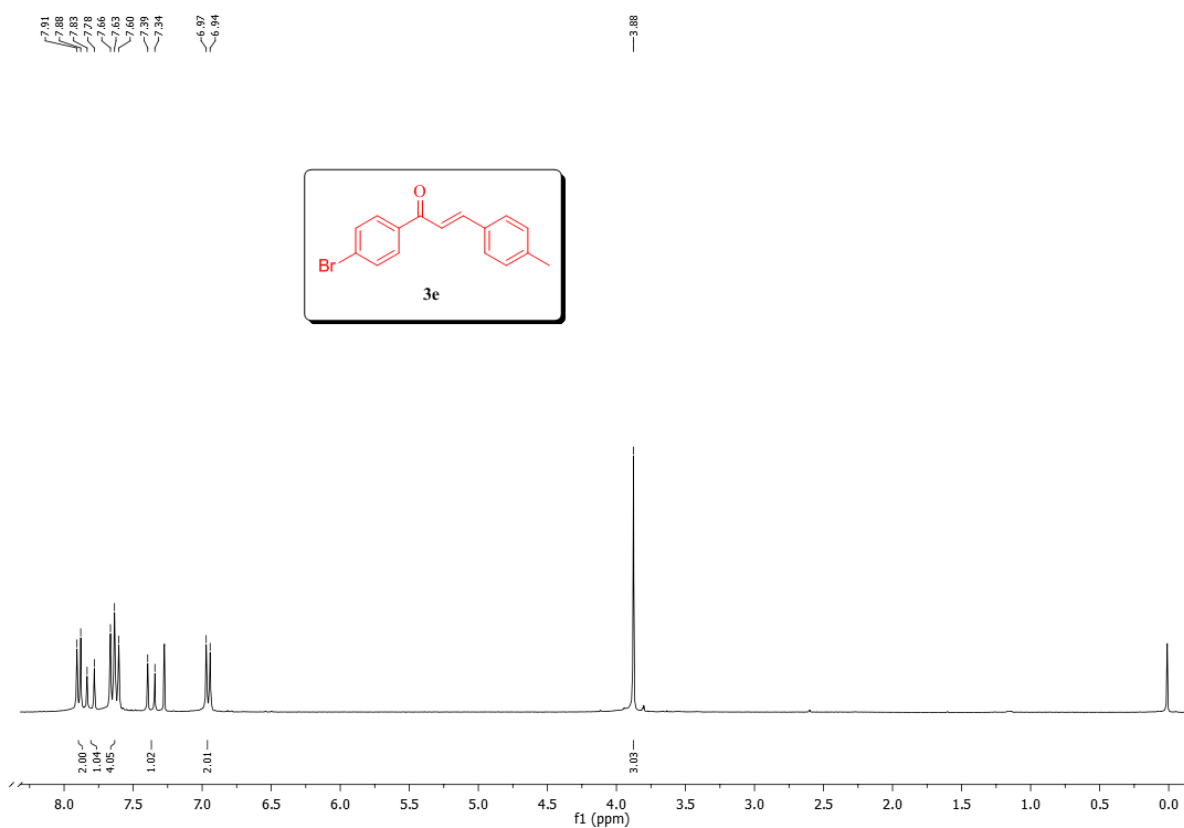S 21:  $^1\text{H}$  NMR Spectrum of (*E*)-1-(4-bromophenyl)-3-*p*-tolylprop-2-en-1-one (**3e**).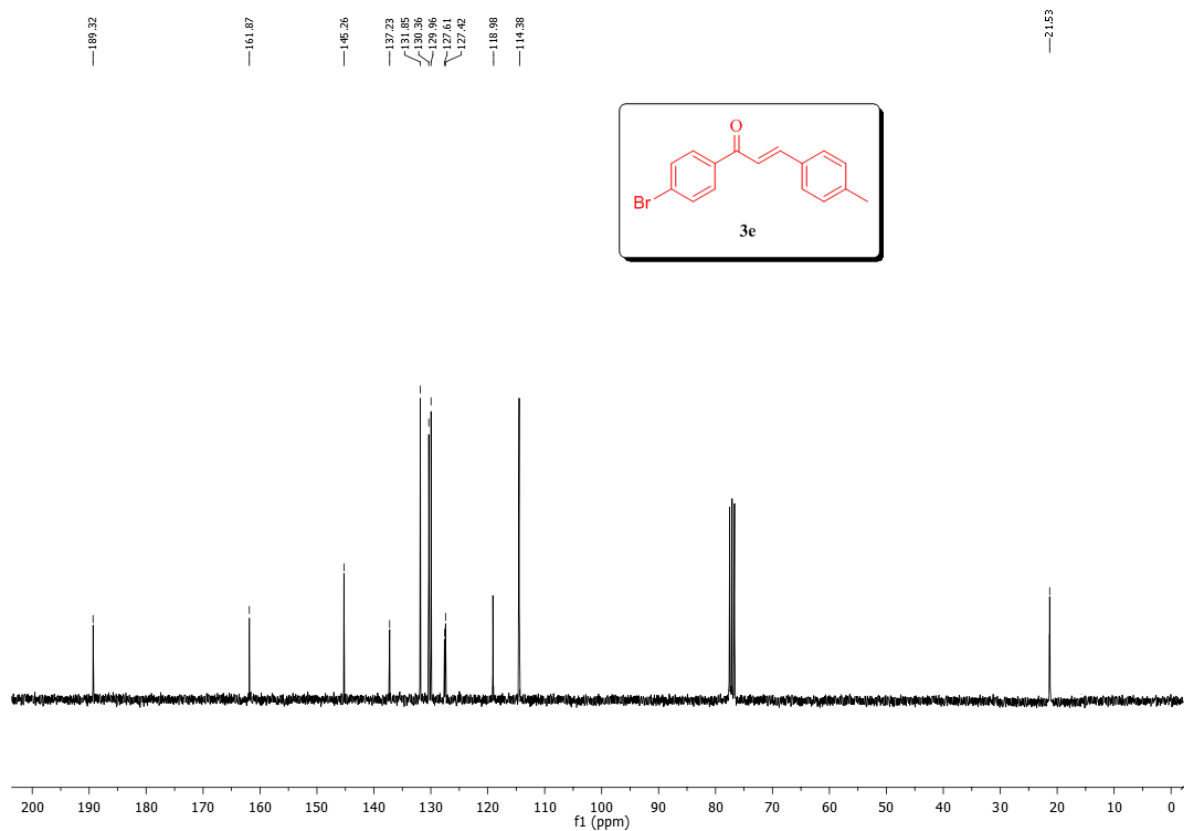S 22:  $^{13}\text{C}$  NMR Spectrum of (*E*)-1-(4-bromophenyl)-3-*p*-tolylprop-2-en-1-one (**3e**)

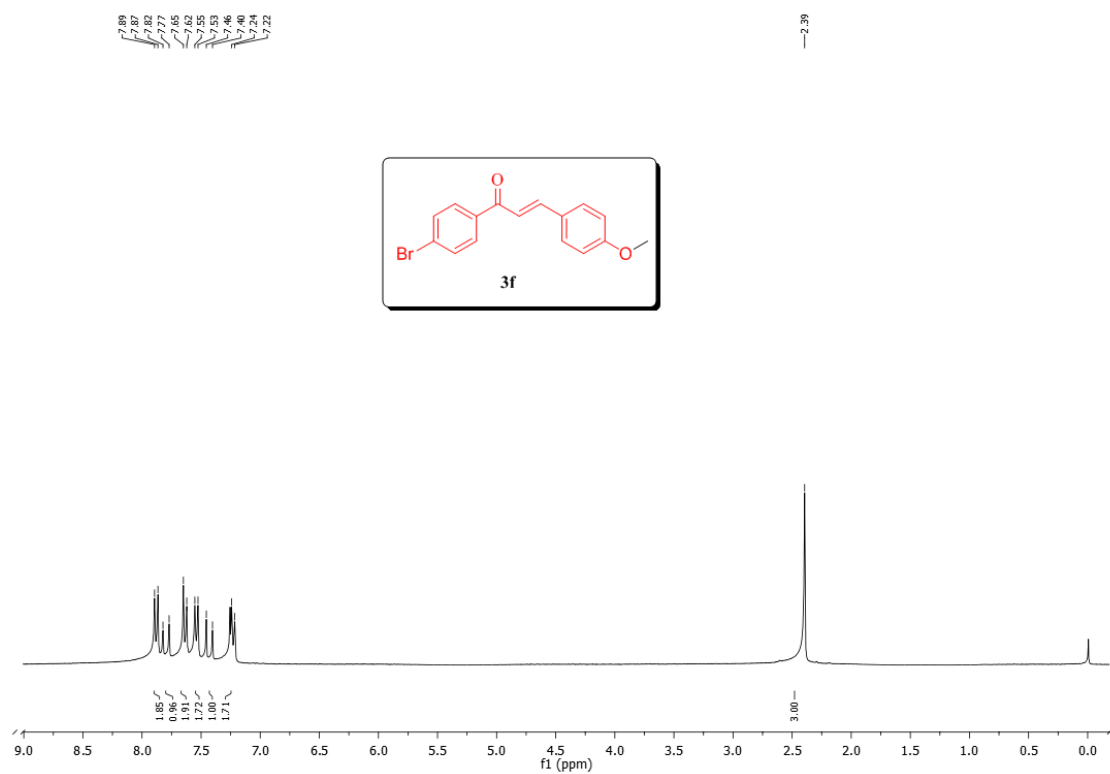

S 23: <sup>1</sup>H NMR Spectrum of (*E*)-1-(4-bromophenyl)-3-(4-methoxyphenyl) prop-2-en-1-one (3f).

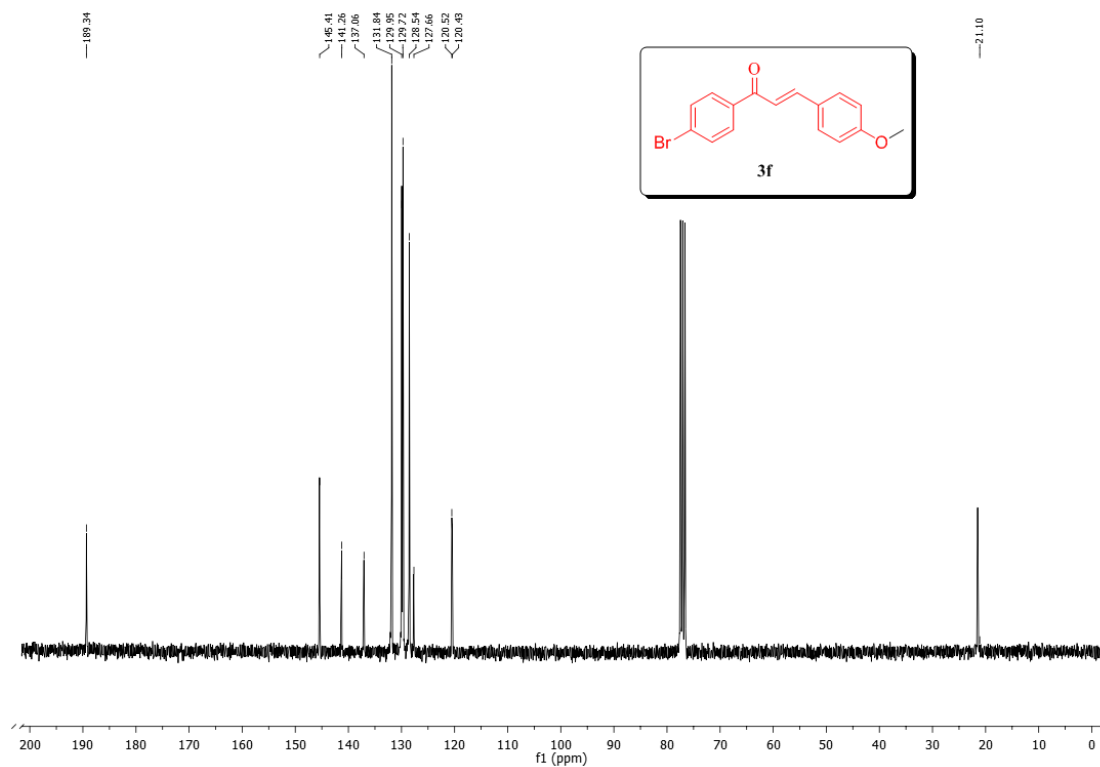

S 24: <sup>13</sup>C NMR Spectrum of (*E*)-1-(4-bromophenyl)-3-(4-methoxyphenyl) prop-2-en-1-one (3f).

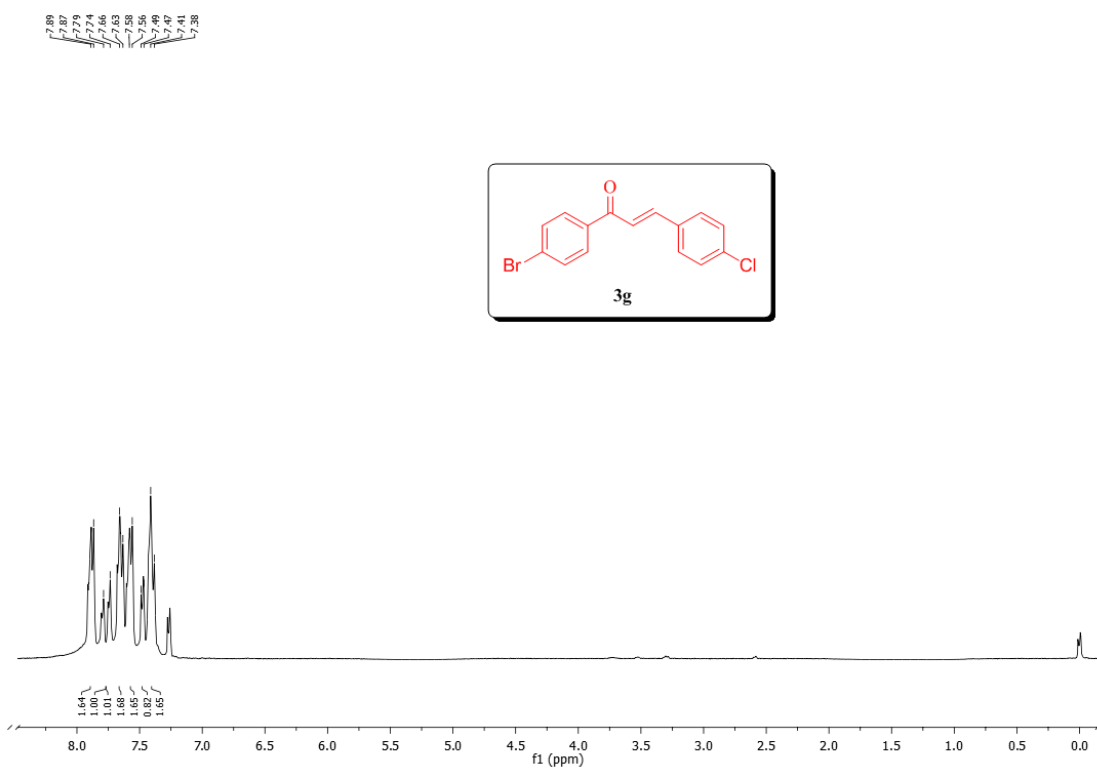

S 25: <sup>1</sup>H NMR Spectrum of (*E*)-1-(4-bromophenyl)-3-(4-chlorophenyl)prop-2-en-1-one (3g).

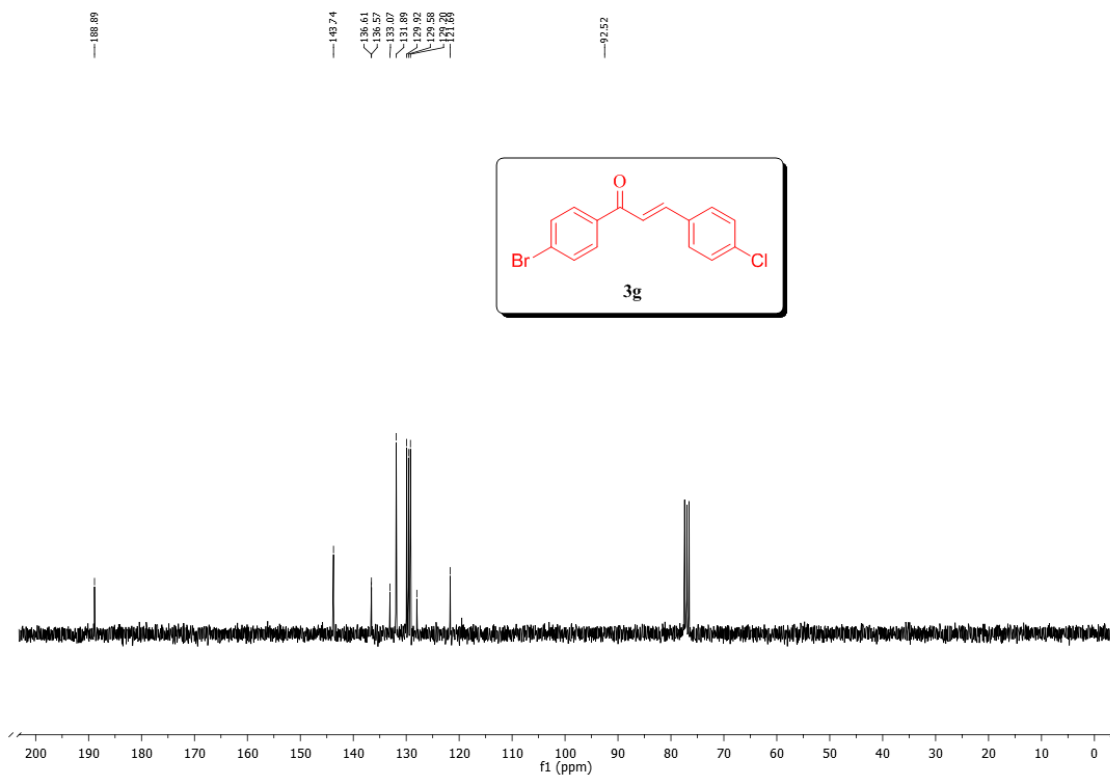

S 26: <sup>13</sup>C NMR Spectrum of (*E*)-1-(4-bromophenyl)-3-(4-chlorophenyl)prop-2-en-1-one (3g).

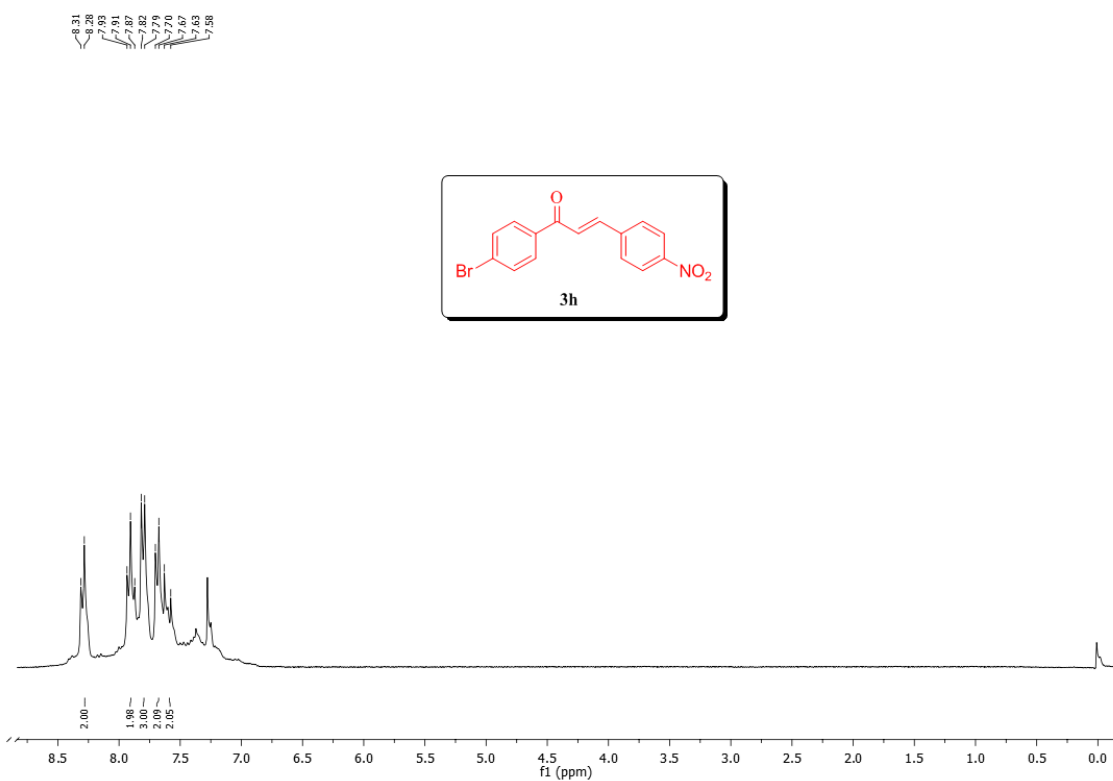

**S 27: <sup>1</sup>H NMR Spectrum of (*E*)-1-(4-bromophenyl)-3-(4-nitrophenyl) prop-2-en-1-one (3h).**

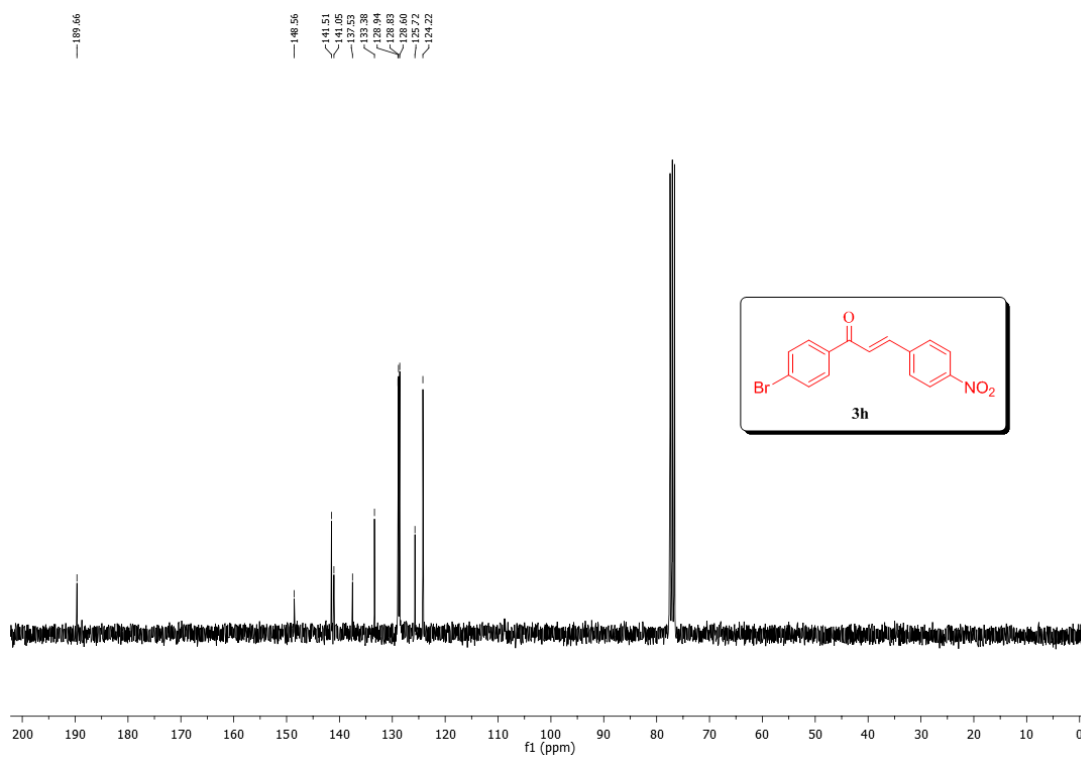

**S 28: <sup>13</sup>C NMR Spectrum of (*E*)-1-(4-bromophenyl)-3-(4-nitrophenyl) prop-2-en-1-one (3h).**



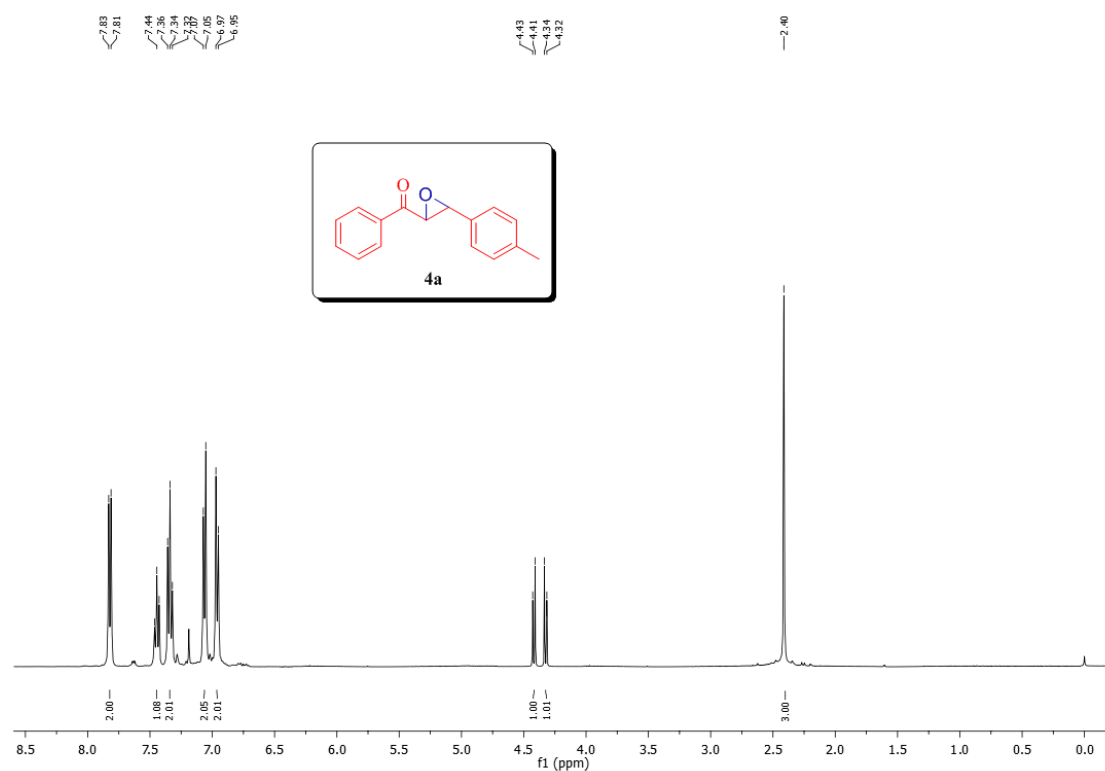

**Figure 29: <sup>1</sup>H NMR Spectrum of *trans*-(2*S*, 3*R*)-Epoxy-3-(4-methylphenyl)-1-phenylpropan-1-one (4a).**

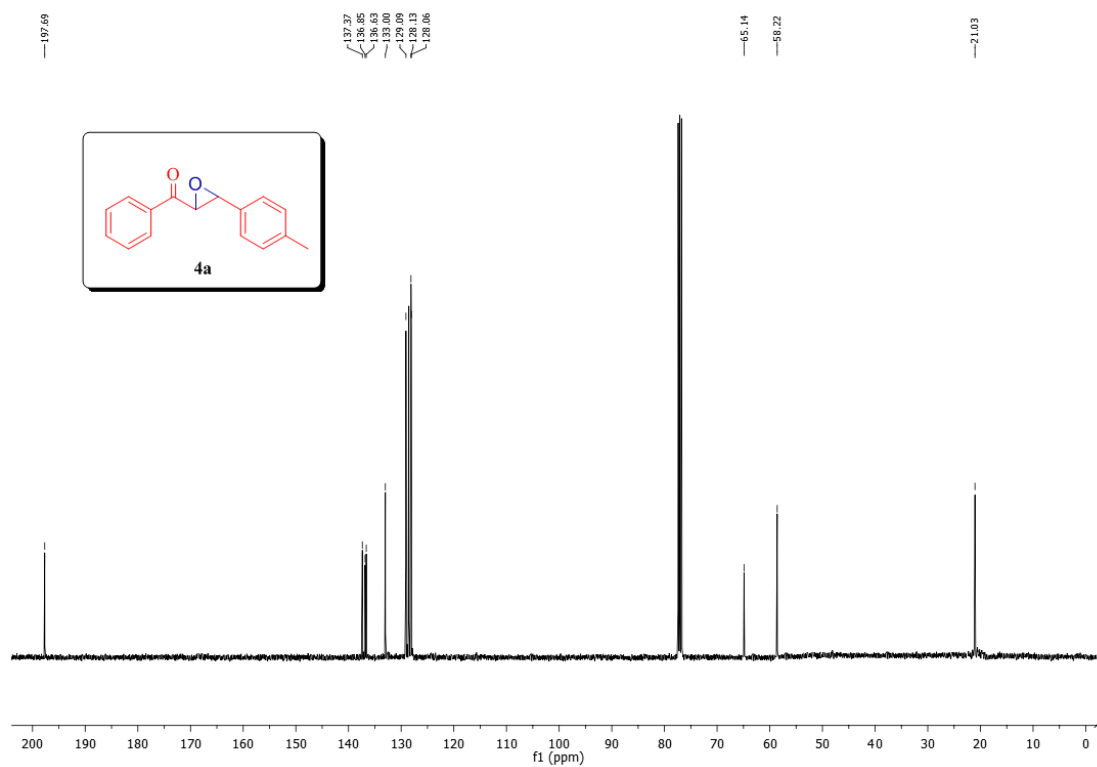

**S 30: <sup>13</sup>C NMR Spectrum of *trans*-(2*S*, 3*R*)-Epoxy-3-(4-methylphenyl)-1-phenylpropan-1-one (4a).**

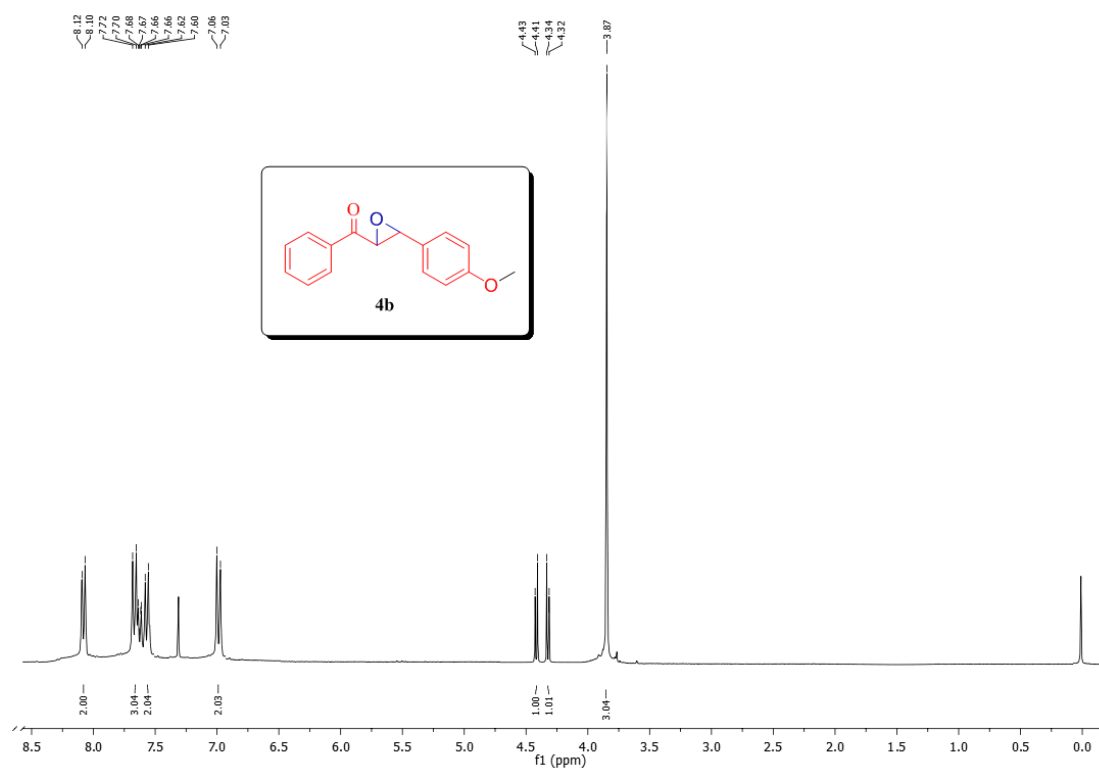

**S 31: <sup>1</sup>H NMR Spectrum of *trans*-(2*S*, 3*R*)-Epoxy-3-(4-methoxyphenyl)-1-phenylproan-1-one (4b).**

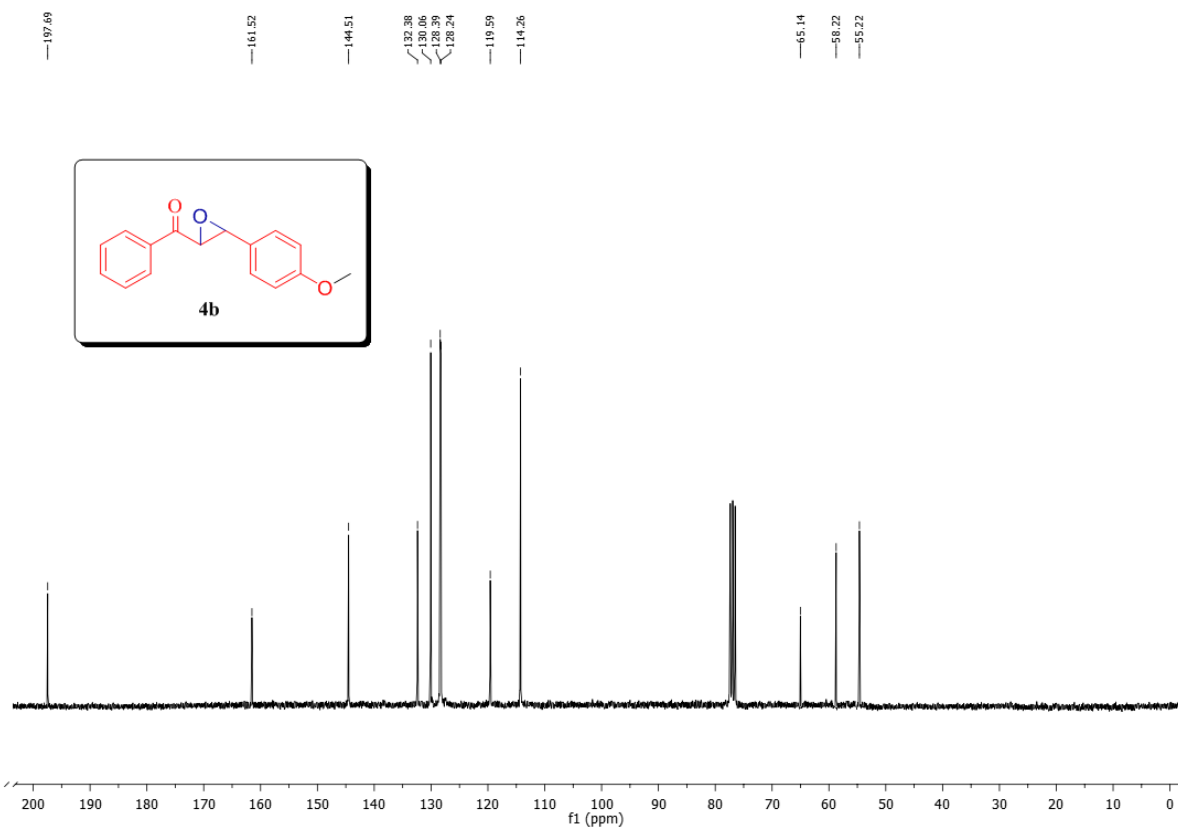

**S 32: <sup>13</sup>C NMR Spectrum of *trans*-(2*S*, 3*R*)-Epoxy-3-(4-methoxyphenyl)-1-phenylproan-1-one (4b).**

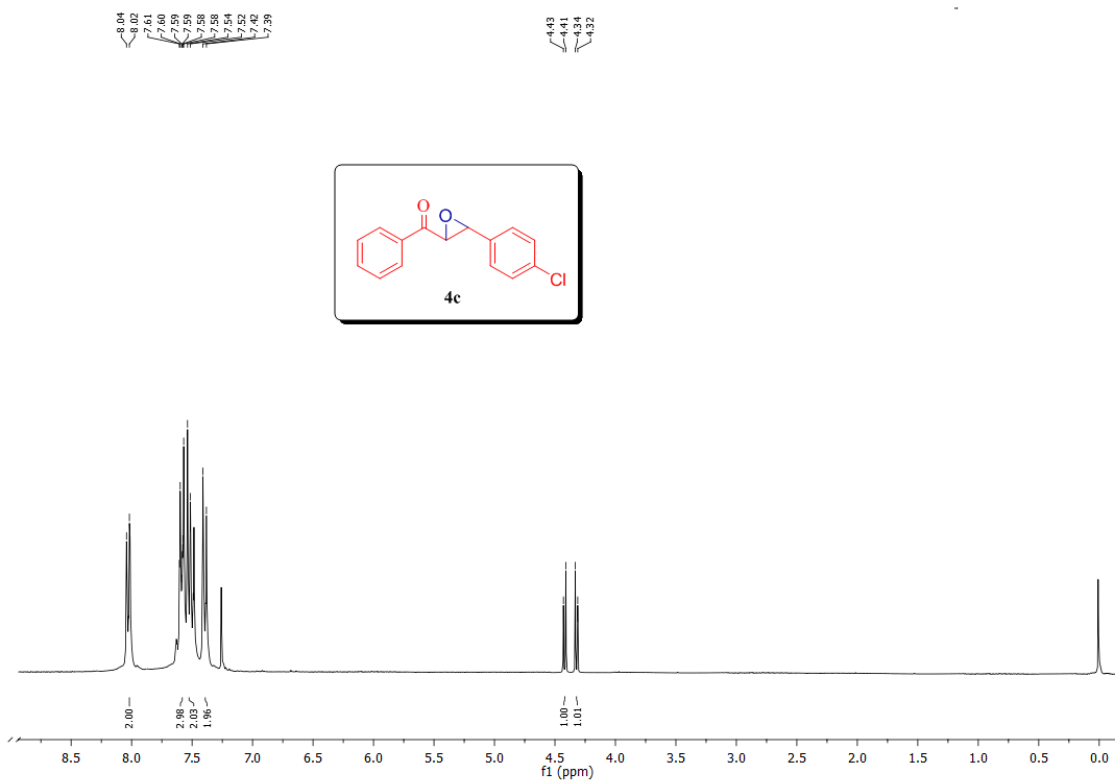

**S 33:** <sup>1</sup>H NMR Spectrum of *trans*-(2*S*, 3*R*)-Epoxy-3-(4-chlorophenyl)-1-phenylproan-1-one (4c).

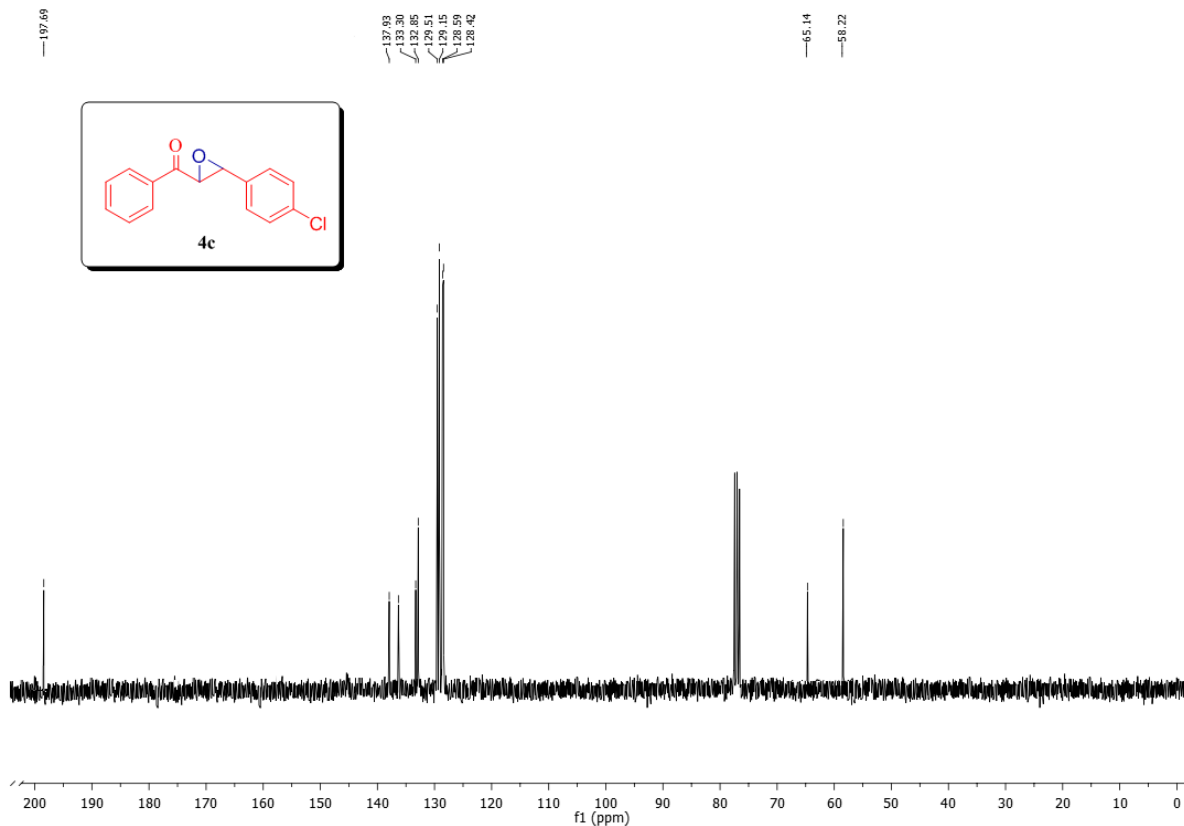

**S 34:** <sup>13</sup>C NMR Spectrum of *trans*-(2*S*, 3*R*)-Epoxy-3-(4-chlorophenyl)-1-phenylproan-1-one (4c).

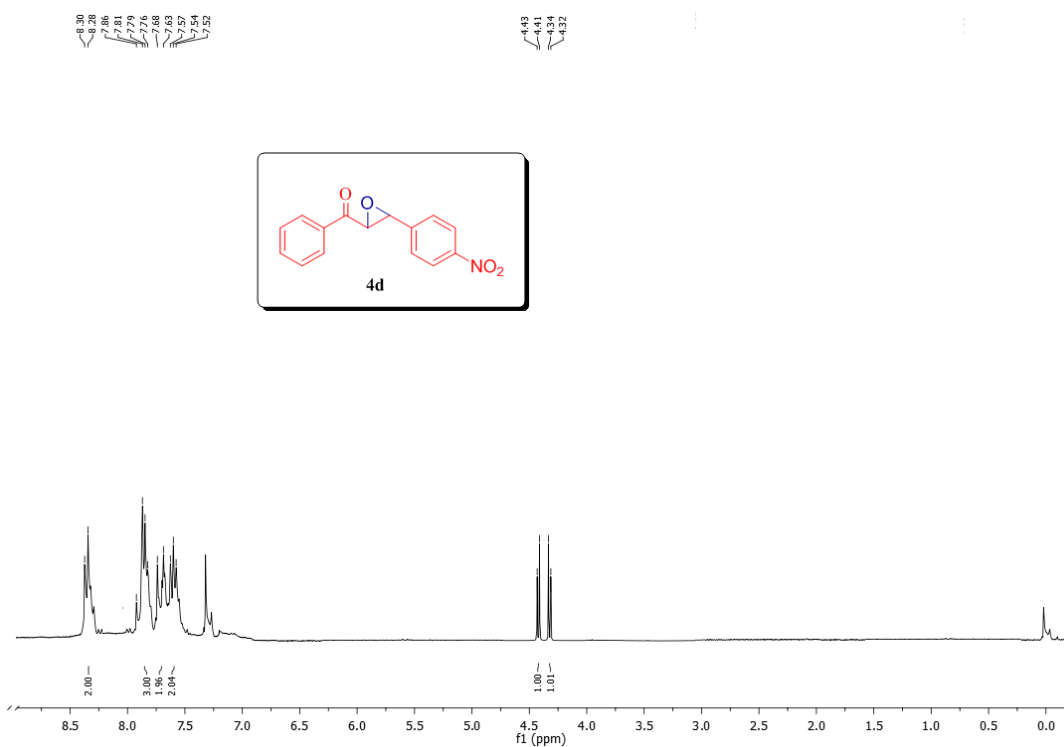

**S 35:**  $^1\text{H}$  NMR Spectrum of *trans*-(2*S*, 3*R*)-Epoxy-3-(4-nitrophenyl)-1-phenylproan-1-one (**4d**).

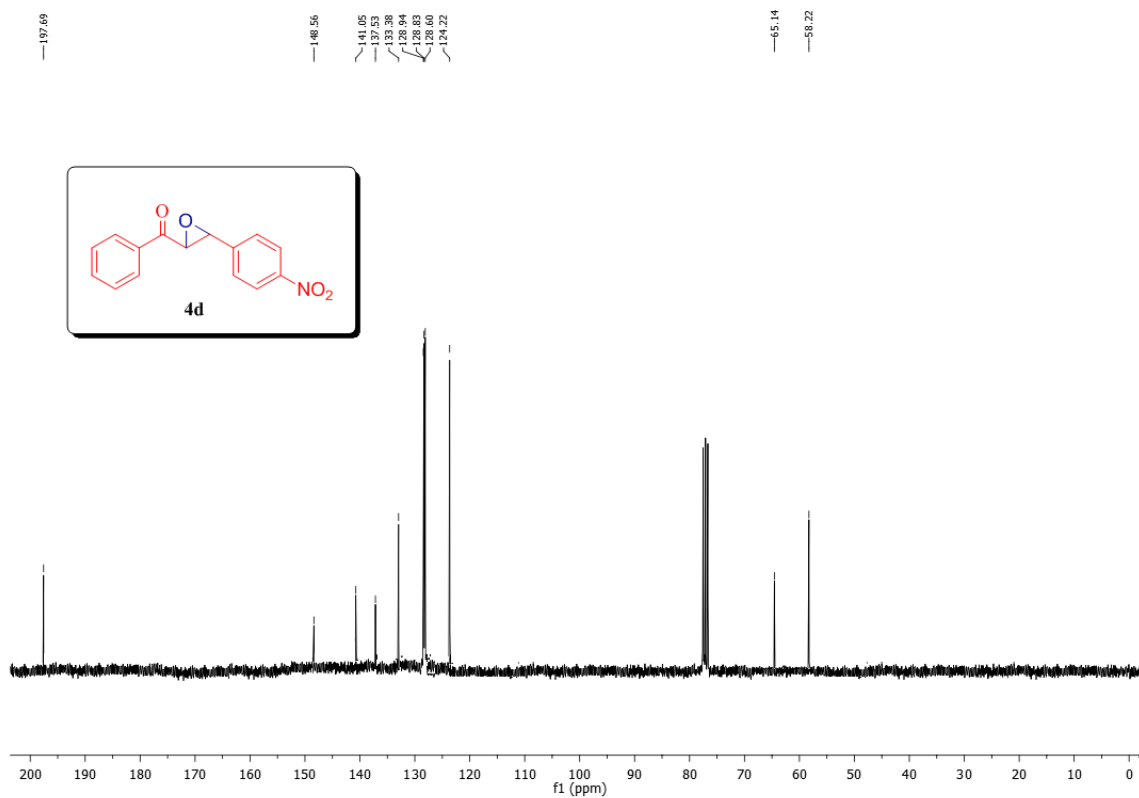

**S 36:**  $^{13}\text{C}$  NMR Spectrum of *trans*-(2*S*, 3*R*)-Epoxy-3-(4-nitrophenyl)-1-phenylproan-1-one (**4d**).

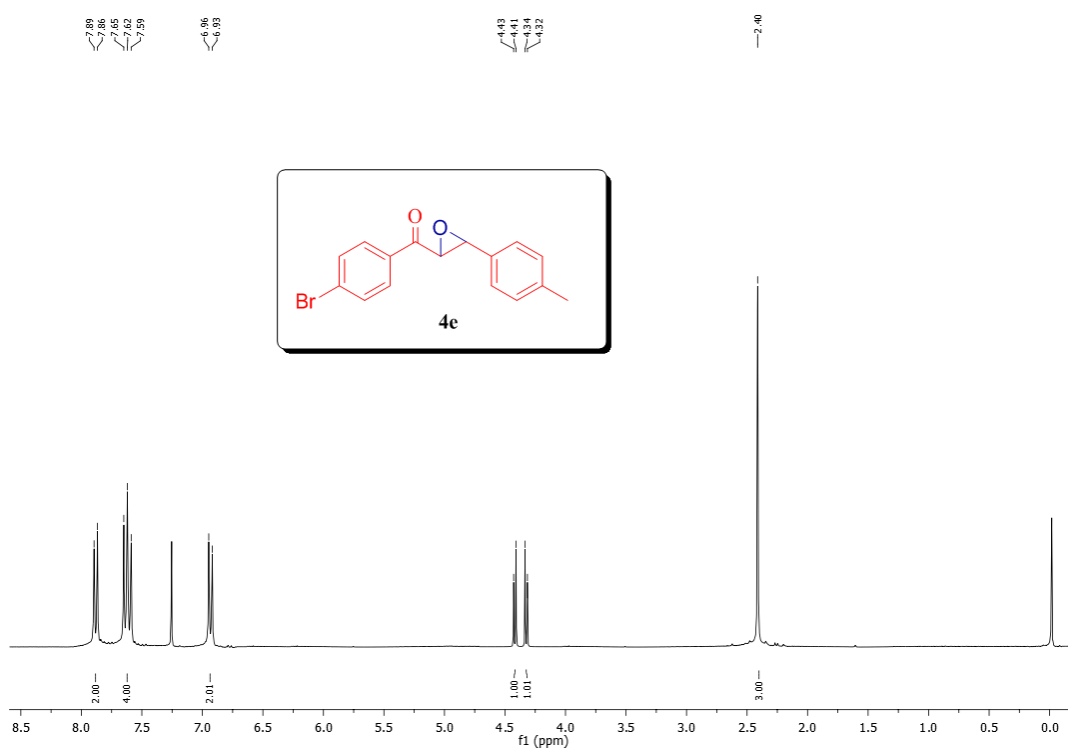

**S 37:**  $^1\text{H}$  NMR Spectrum of *trans*-(2*S*, 3*R*)-Epoxy-1-(4-bromophenyl)-3-(4-methylphenyl)proan-1-one (**4e**).

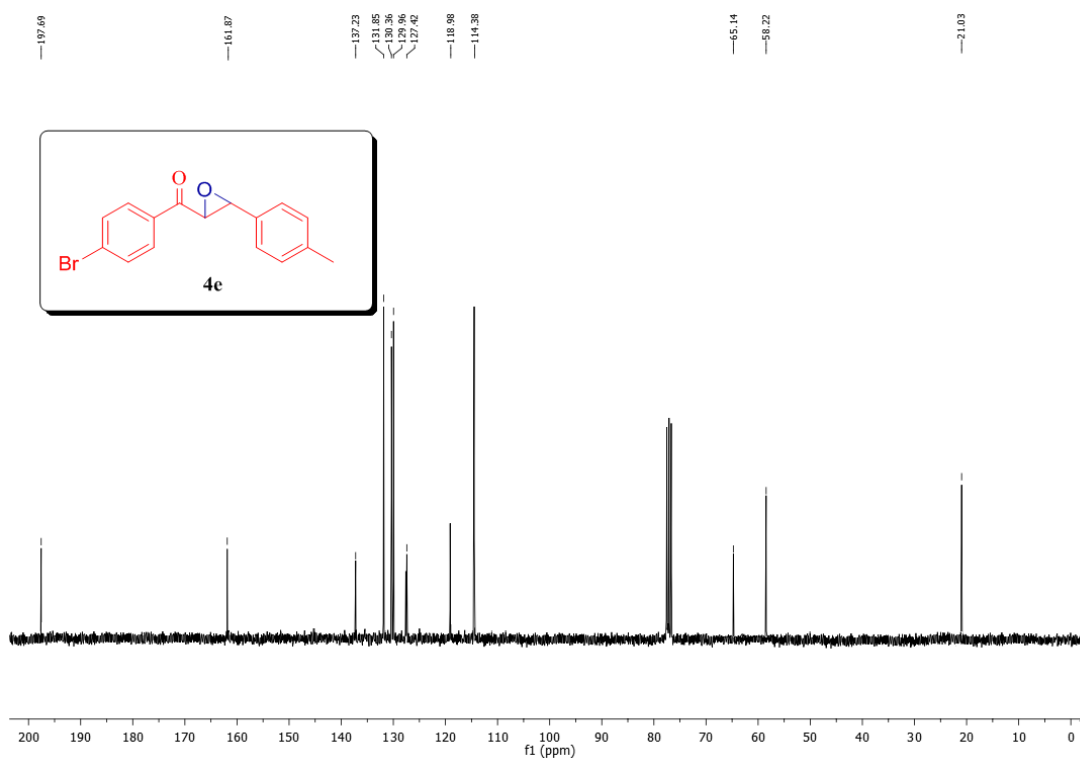

**S 38:**  $^{13}\text{C}$  NMR Spectrum of *trans*-(2*S*, 3*R*)-Epoxy-1-(4-bromophenyl)-3-(4-methylphenyl)proan-1-one (**4e**).

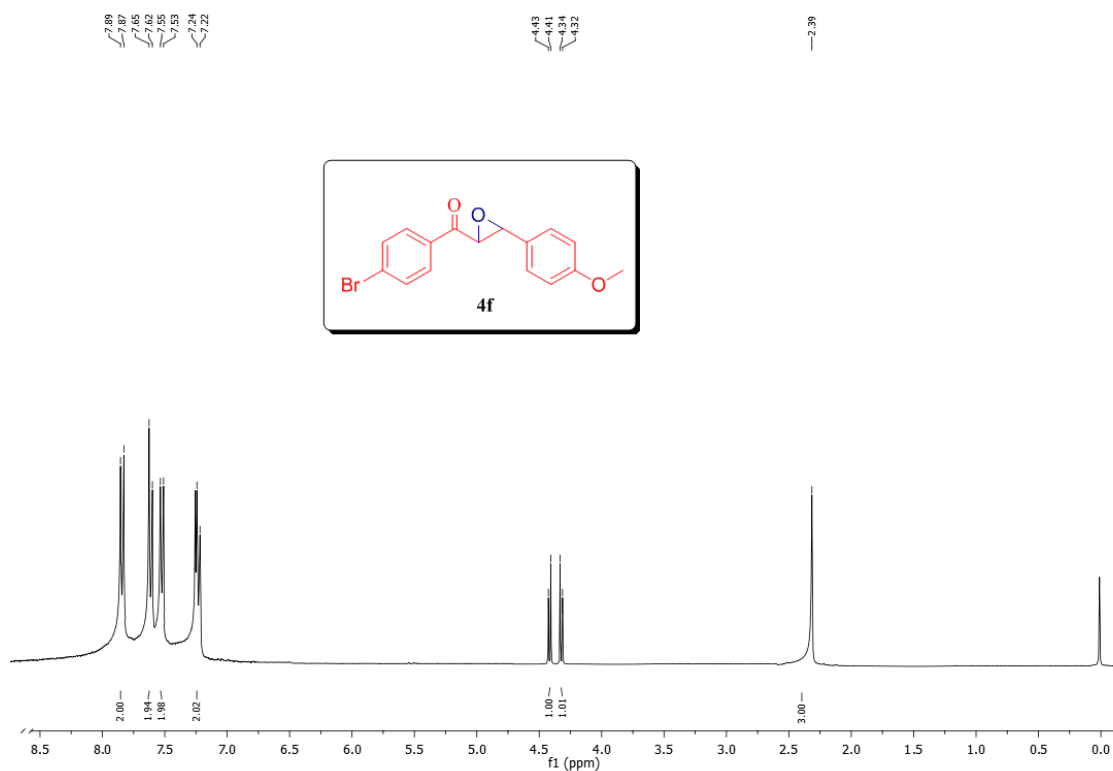

**S 39:**  $^1\text{H}$  NMR Spectrum of *trans*-(2*S*, 3*R*)-Epoxy-1-(4-bromophenyl)-3-(4-methoxyphenyl)propan-1-one (**4f**).

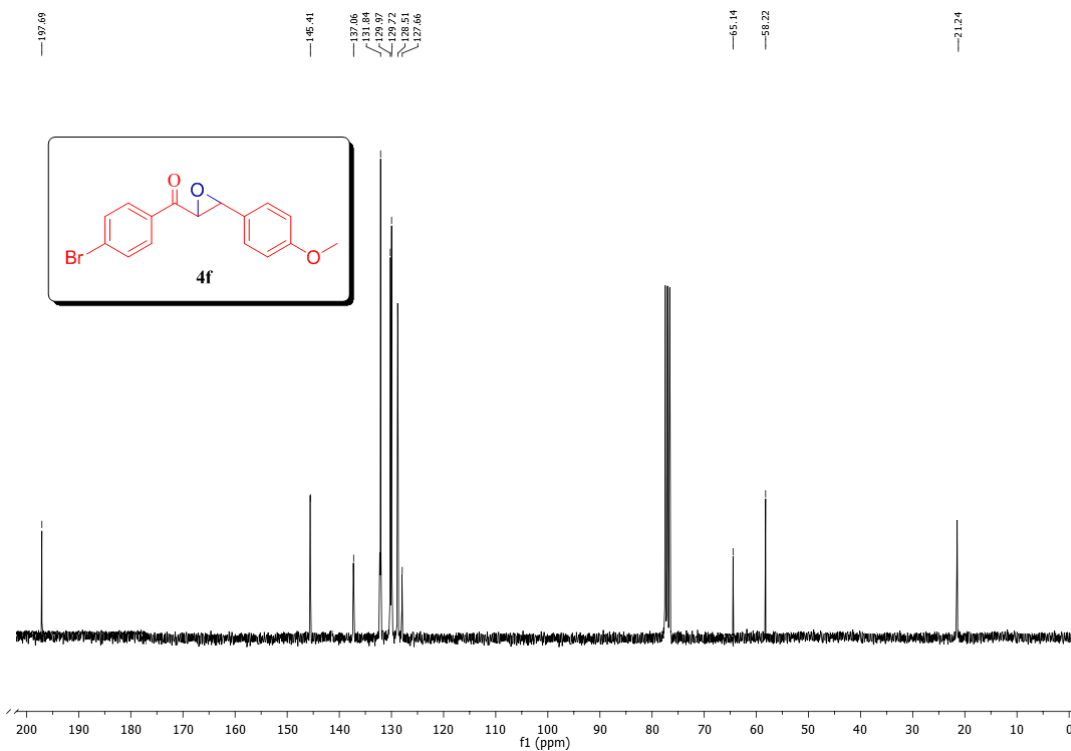

**S 40:**  $^{13}\text{C}$  NMR Spectrum of *trans*-(2*S*, 3*R*)-Epoxy-1-(4-bromophenyl)-3-(4-methoxyphenyl)propan-1-one (**4f**).

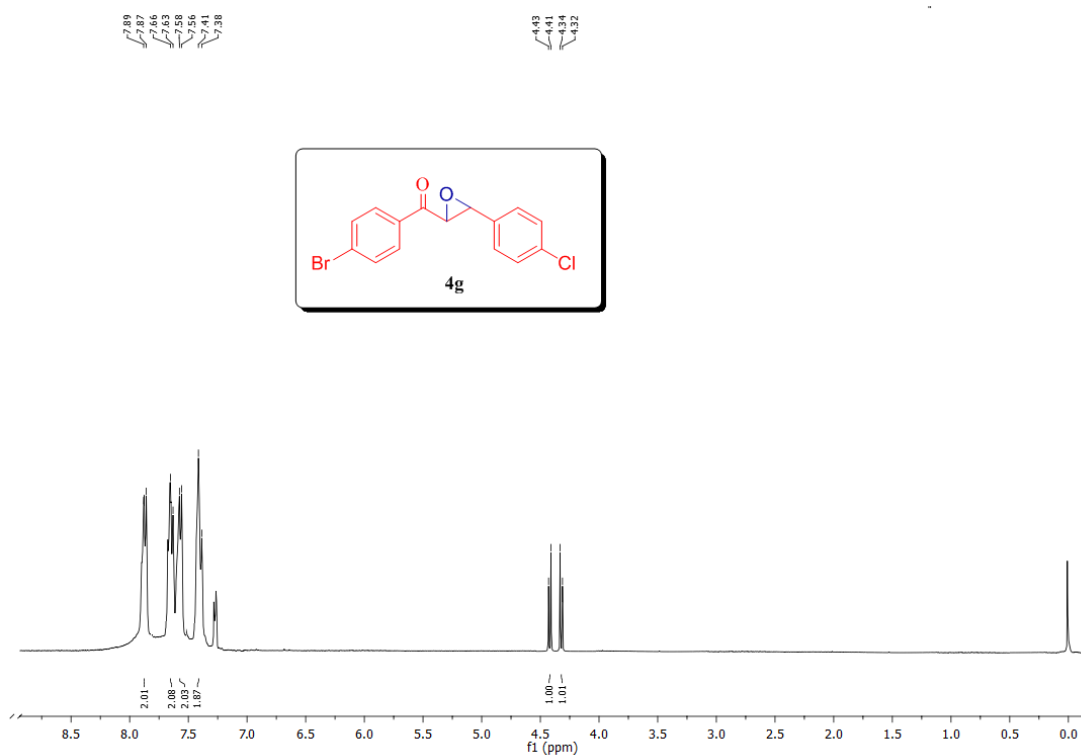

**S 41: <sup>1</sup>H NMR Spectrum of *trans*-(2*S*, 3*R*)-Epoxy-1-(4-bromophenyl)-3-(4-chlorophenyl)proan-1-one (**4g**).**

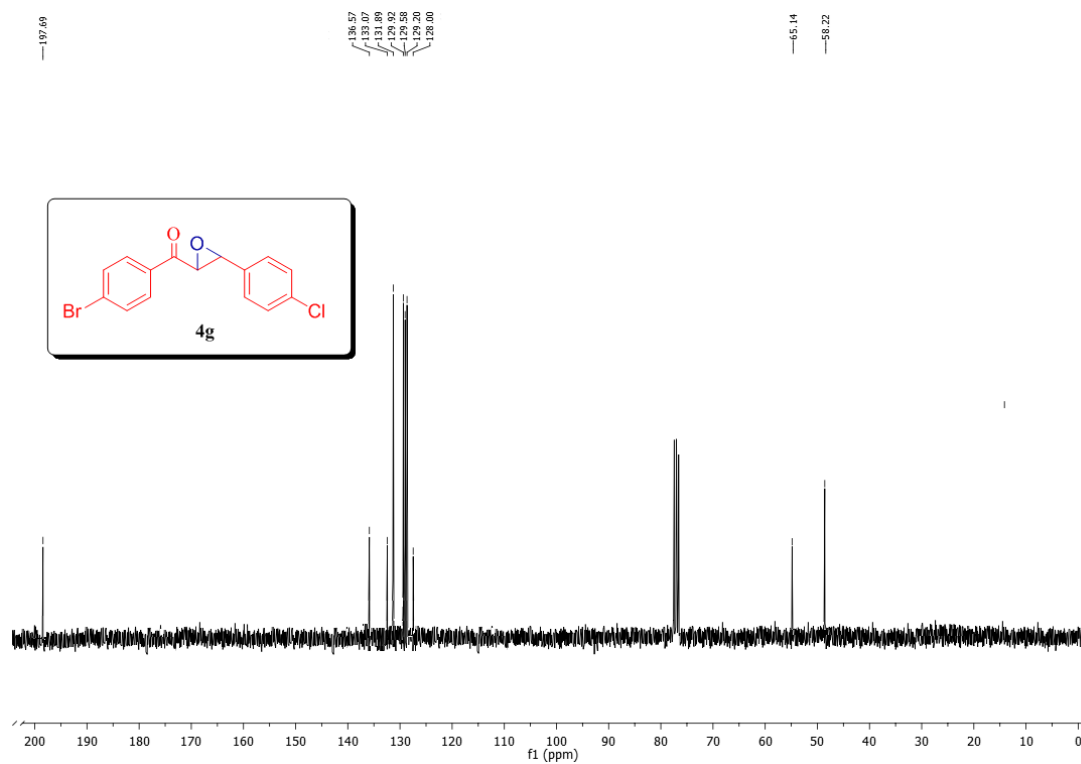

**S 42: <sup>13</sup>C NMR Spectrum of *trans*-(2*S*, 3*R*)-Epoxy-1-(4-bromophenyl)-3-(4-chlorophenyl)proan-1-one (**4g**).**

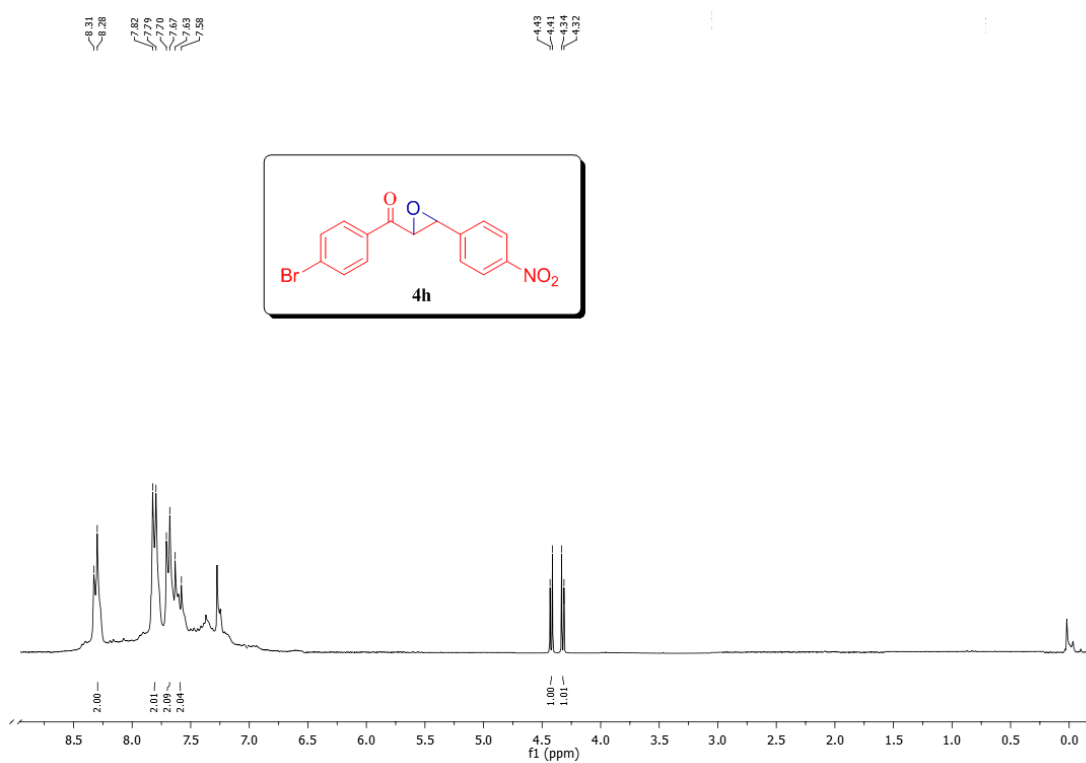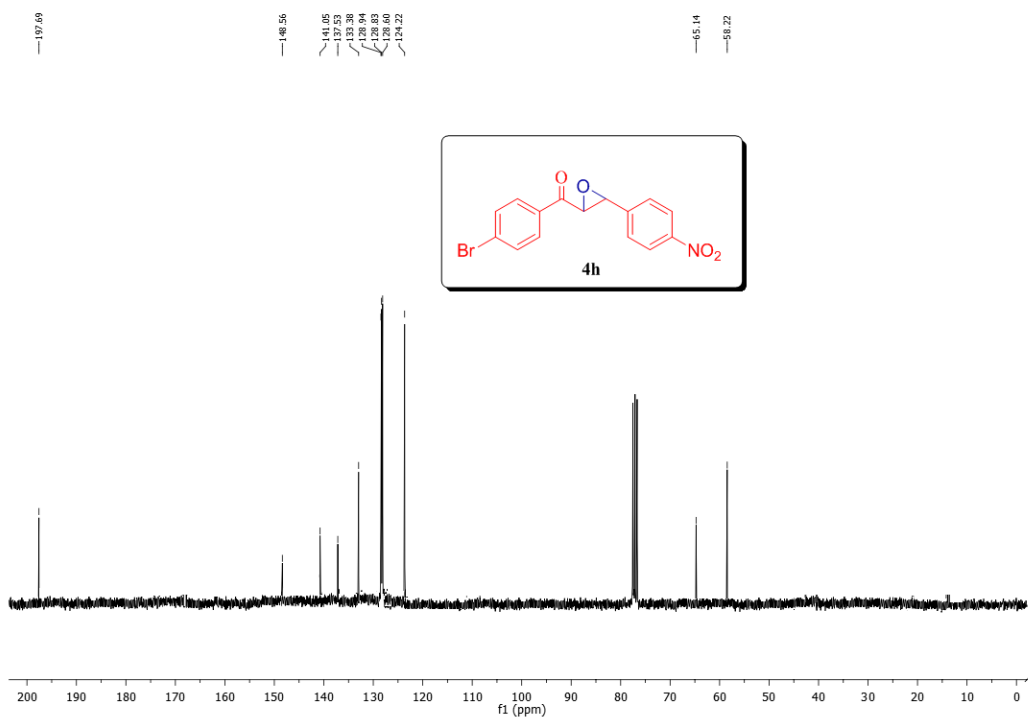



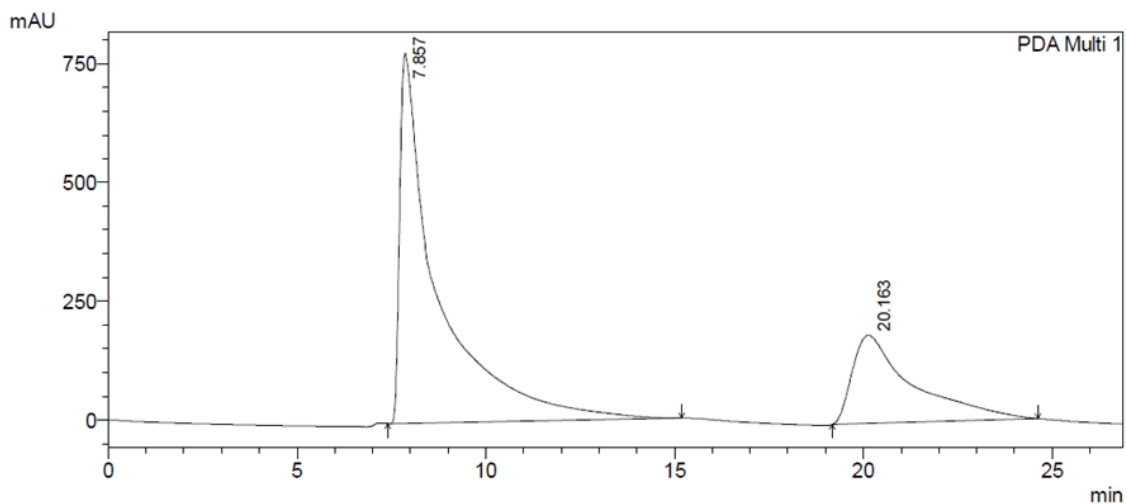

PeakTable

PDA Ch1 254nm 4nm

| Peak# | Ret. Time | Area     | Height | Area %  | Height % |
|-------|-----------|----------|--------|---------|----------|
| 1     | 7.857     | 54464703 | 778097 | 72.455  | 80.730   |
| 2     | 20.163    | 20705331 | 185730 | 27.545  | 19.270   |
| Total |           | 75170034 | 963828 | 100.000 | 100.000  |

**S 45: HPLC spectrum of 4a in the presence of CMPTC (10a) and NaOH/H<sub>2</sub>O<sub>2</sub> condition.**

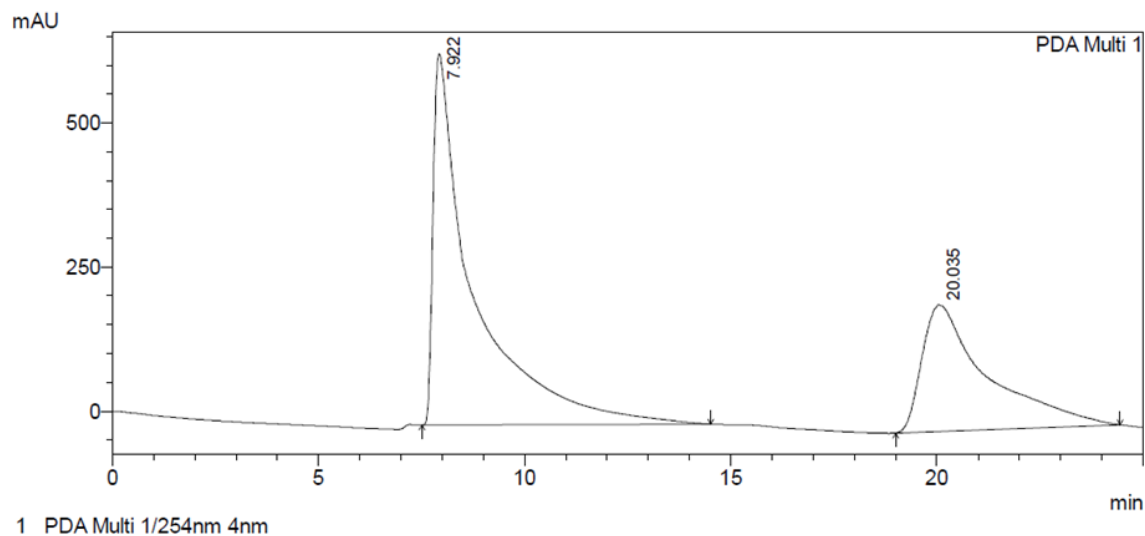

PeakTable

PDA Ch1 254nm 4nm

| Peak# | Ret. Time | Area     | Height | Area %  | Height % |
|-------|-----------|----------|--------|---------|----------|
| 1     | 7.922     | 44027272 | 643831 | 64.576  | 74.554   |
| 2     | 20.035    | 24151986 | 219749 | 35.424  | 25.446   |
| Total |           | 68179258 | 863580 | 100.000 | 100.000  |

**S46: HPLC spectrum of 4a in the presence of CMPTC (10b) and NaOH/H<sub>2</sub>O<sub>2</sub> condition.**

## Supporting Information

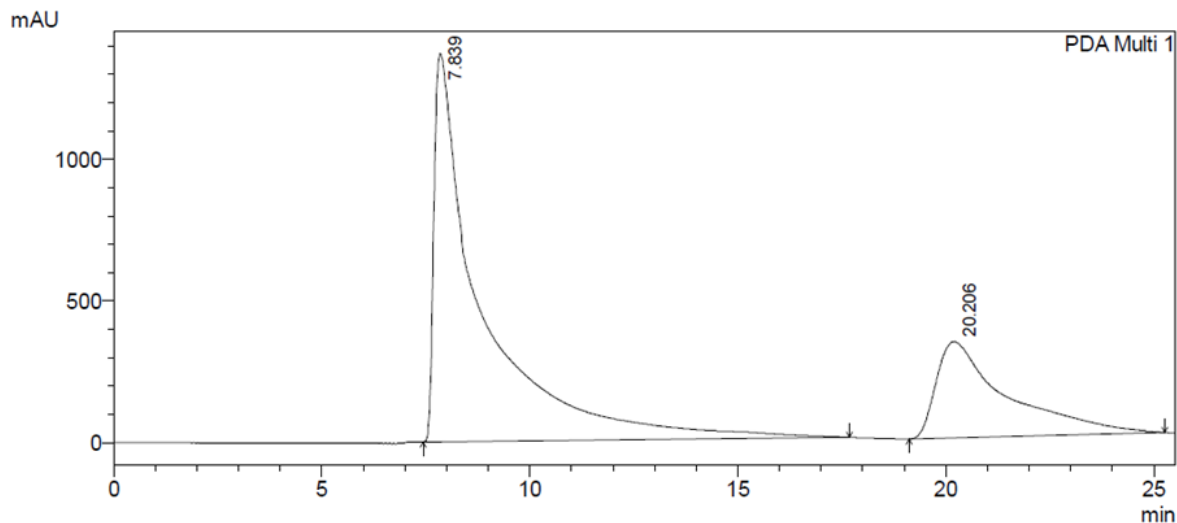

PeakTable

| Peak# | Ret. Time | Area      | Height  | Area %  | Height % |
|-------|-----------|-----------|---------|---------|----------|
| 1     | 7.839     | 109844267 | 1371093 | 73.287  | 80.101   |
| 2     | 20.206    | 40038701  | 340607  | 26.713  | 19.899   |
| Total |           | 149882969 | 1711700 | 100.000 | 100.000  |

### S 47: HPLC spectrum of 4a in the presence of CMPTC (10a) and NaOH/NaOCl condition.

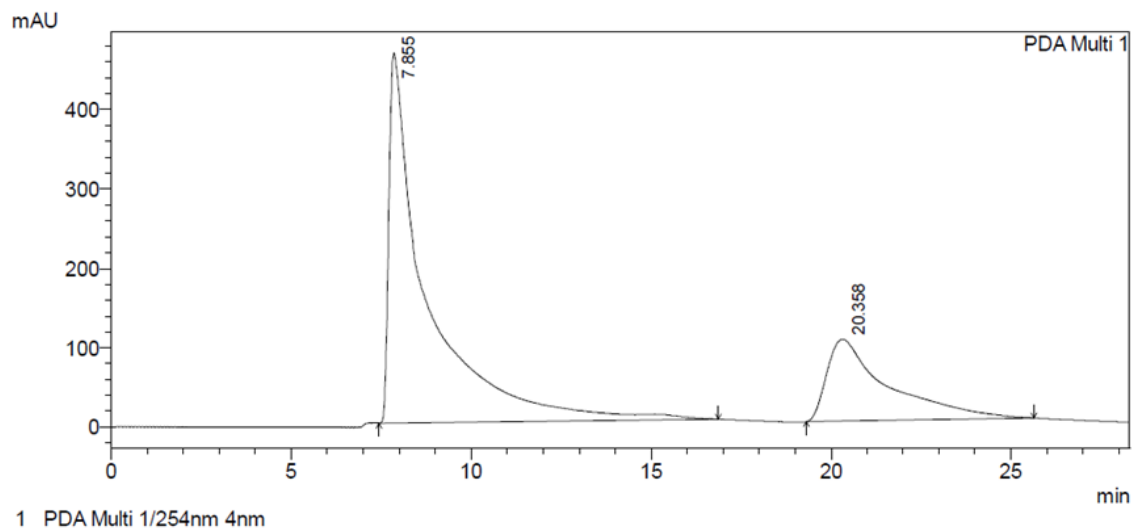

PeakTable

| Peak# | Ret. Time | Area     | Height | Area %  | Height % |
|-------|-----------|----------|--------|---------|----------|
| 1     | 7.855     | 34222554 | 466412 | 73.685  | 81.877   |
| 2     | 20.358    | 12221778 | 103238 | 26.315  | 18.123   |
| Total |           | 46444332 | 569650 | 100.000 | 100.000  |

### S 48: HPLC spectrum of 4a in the presence of CMPTC (10b) and NaOH/NaOCl condition.

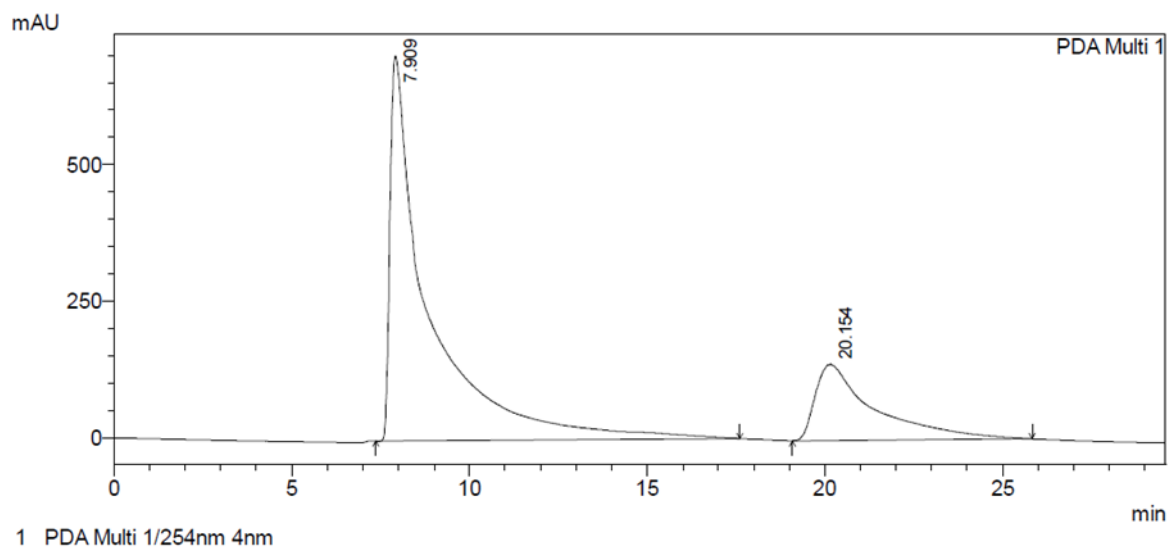

PeakTable

| PDA Ch1 254nm 4nm |           |          |        |         |          |
|-------------------|-----------|----------|--------|---------|----------|
| Peak#             | Ret. Time | Area     | Height | Area %  | Height % |
| 1                 | 7.909     | 53509094 | 704650 | 76.891  | 83.421   |
| 2                 | 20.154    | 16081459 | 140045 | 23.109  | 16.579   |
| Total             |           | 69590552 | 844695 | 100.000 | 100.000  |

**S 49: HPLC spectrum of 4a in the presence of CMPTC (10a) and KOH/H<sub>2</sub>O<sub>2</sub> condition.**

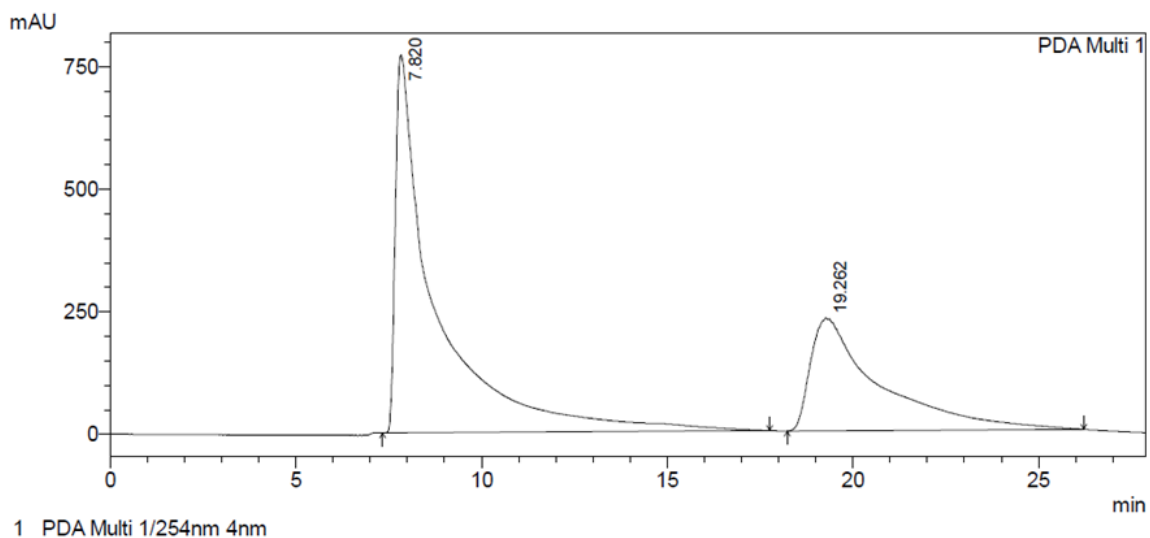

PeakTable

| PDA Ch1 254nm 4nm |           |          |         |         |          |
|-------------------|-----------|----------|---------|---------|----------|
| Peak#             | Ret. Time | Area     | Height  | Area %  | Height % |
| 1                 | 7.820     | 58134003 | 770678  | 66.209  | 76.991   |
| 2                 | 19.262    | 29670237 | 230326  | 33.791  | 23.009   |
| Total             |           | 87804240 | 1001004 | 100.000 | 100.000  |

**S 50: HPLC spectrum of 4a in the presence of CMPTC (10b) and KOH/H<sub>2</sub>O<sub>2</sub> condition.**

## Supporting Information

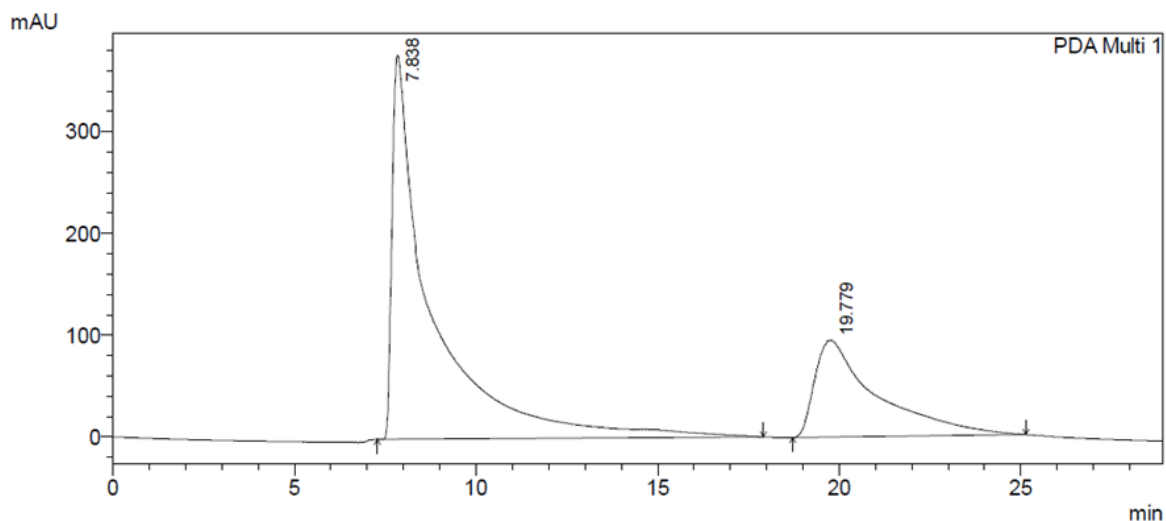

PeakTable

| Peak# | Ret. Time | Area     | Height | Area %  | Height % |
|-------|-----------|----------|--------|---------|----------|
| 1     | 7.838     | 28487015 | 377498 | 71.571  | 79.780   |
| 2     | 19.779    | 11315537 | 95676  | 28.429  | 20.220   |
| Total |           | 39802551 | 473174 | 100.000 | 100.000  |

**S 51: HPLC spectrum of 4a in the presence of CMPTC (10a) and KOH/NaOCl condition.**

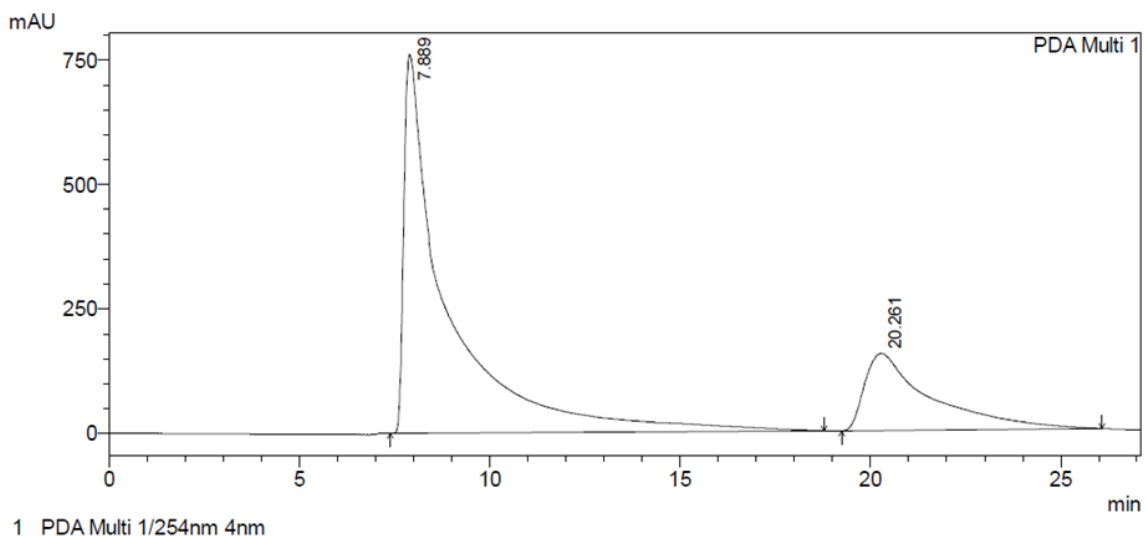

PeakTable

| Peak# | Ret. Time | Area     | Height | Area %  | Height % |
|-------|-----------|----------|--------|---------|----------|
| 1     | 7.889     | 60089715 | 761490 | 76.241  | 83.003   |
| 2     | 20.261    | 18725998 | 155938 | 23.759  | 16.997   |
| Total |           | 78815713 | 917428 | 100.000 | 100.000  |

**S 52: HPLC spectrum of 4a in the presence of CMPTC (10b) and KOH/NaOCl condition.**

**Supporting Information**

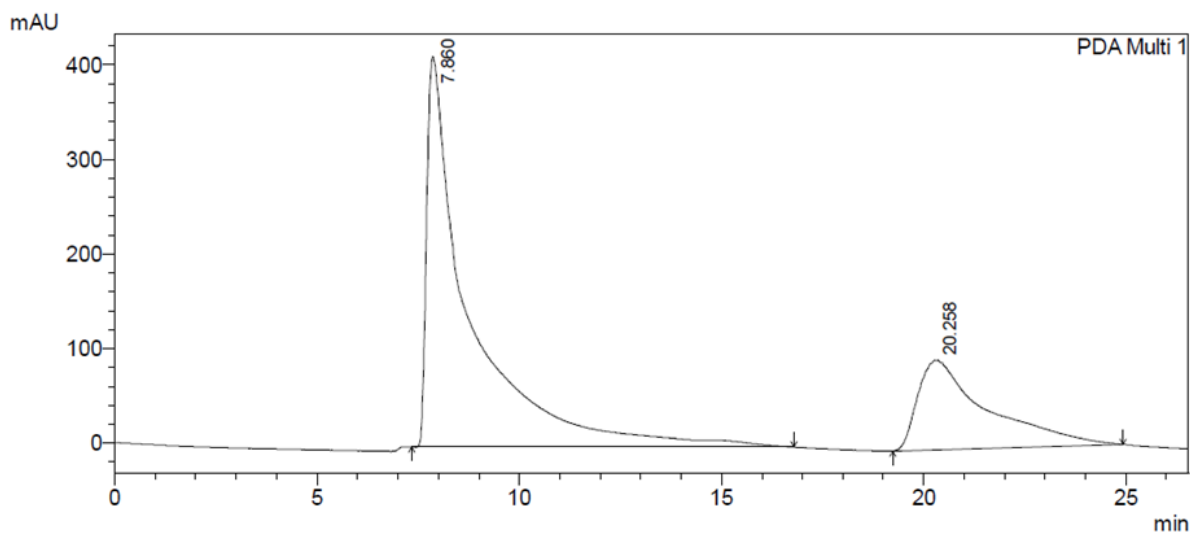

PeakTable

PDA Ch1 254nm 4nm

| Peak# | Ret. Time | Area     | Height | Area %  | Height % |
|-------|-----------|----------|--------|---------|----------|
| 1     | 7.860     | 30389487 | 413299 | 72.925  | 81.320   |
| 2     | 20.258    | 11282955 | 94939  | 27.075  | 18.680   |
| Total |           | 41672442 | 508237 | 100.000 | 100.000  |

**S 53: HPLC spectrum of 4a in the presence of CMPTC (10a) and K<sup>t</sup>OBu/H<sub>2</sub>O<sub>2</sub> condition.**

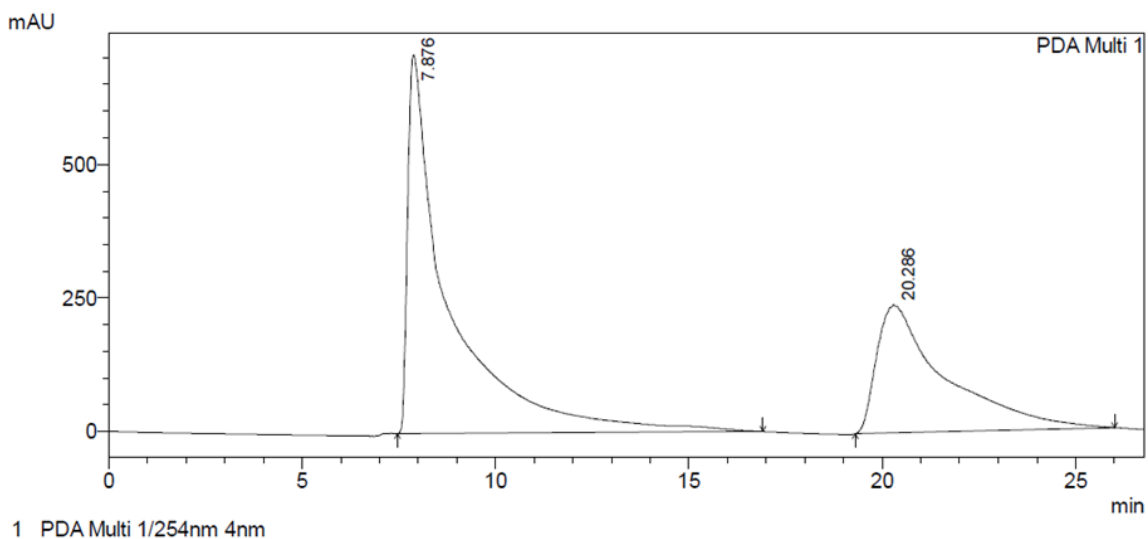

PeakTable

PDA Ch1 254nm 4nm

| Peak# | Ret. Time | Area     | Height | Area %  | Height % |
|-------|-----------|----------|--------|---------|----------|
| 1     | 7.876     | 52668009 | 709037 | 64.138  | 74.698   |
| 2     | 20.286    | 29448349 | 240171 | 35.862  | 25.302   |
| Total |           | 82116359 | 949208 | 100.000 | 100.000  |

**S 54: HPLC spectrum of 4a in the presence of CMPTC (10b) and K<sup>t</sup>OBu/H<sub>2</sub>O<sub>2</sub> condition.**

## Supporting Information

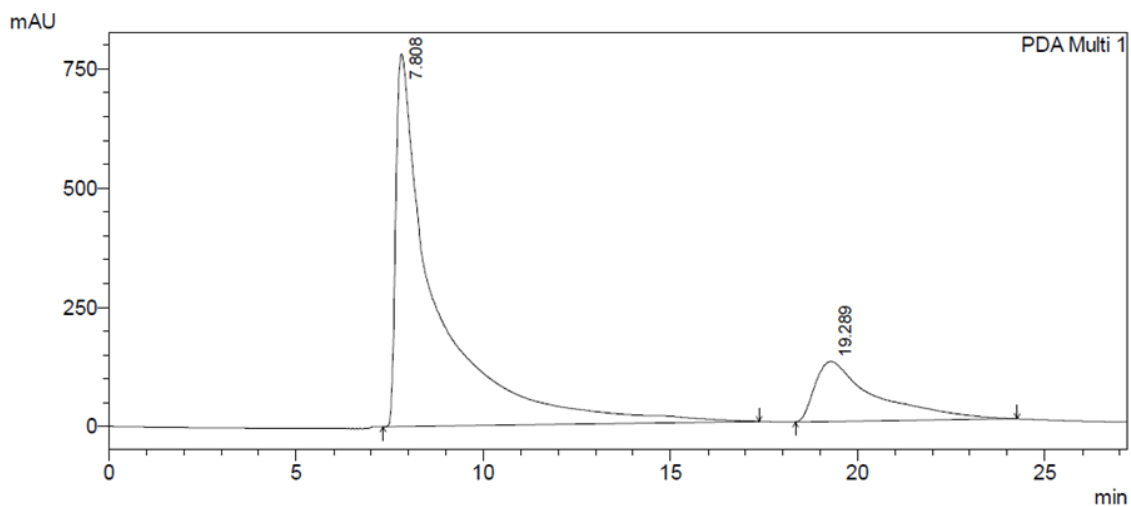

PeakTable

| Peak# | Ret. Time | Area     | Height | Area %  | Height % |
|-------|-----------|----------|--------|---------|----------|
| 1     | 7.808     | 58495258 | 780820 | 80.586  | 86.071   |
| 2     | 19.289    | 14092196 | 126359 | 19.414  | 13.929   |
| Total |           | 72587454 | 907179 | 100.000 | 100.000  |

**S 55: HPLC spectrum of 4a in the presence of CMPTC (10a) and K<sup>t</sup>OBu/NaOCl condition.**

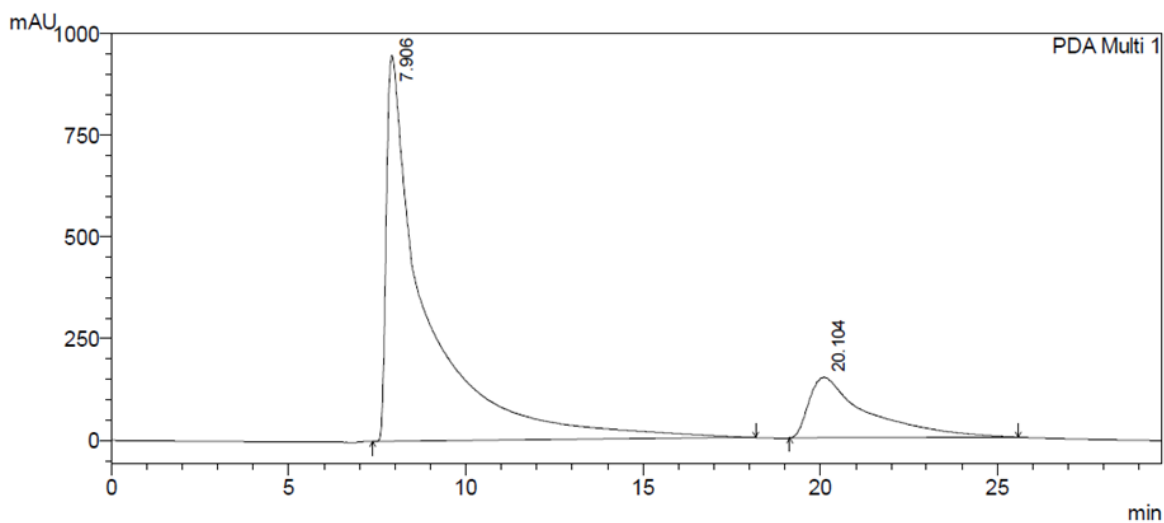

PeakTable

| Peak# | Ret. Time | Area     | Height  | Area %  | Height % |
|-------|-----------|----------|---------|---------|----------|
| 1     | 7.906     | 74234860 | 948445  | 81.232  | 86.377   |
| 2     | 20.104    | 17151253 | 149585  | 18.768  | 13.623   |
| Total |           | 91386113 | 1098030 | 100.000 | 100.000  |

**S 56: HPLC spectrum of 4a in the presence of CMPTC (10b) and K<sup>t</sup>OBu/NaOCl condition.**

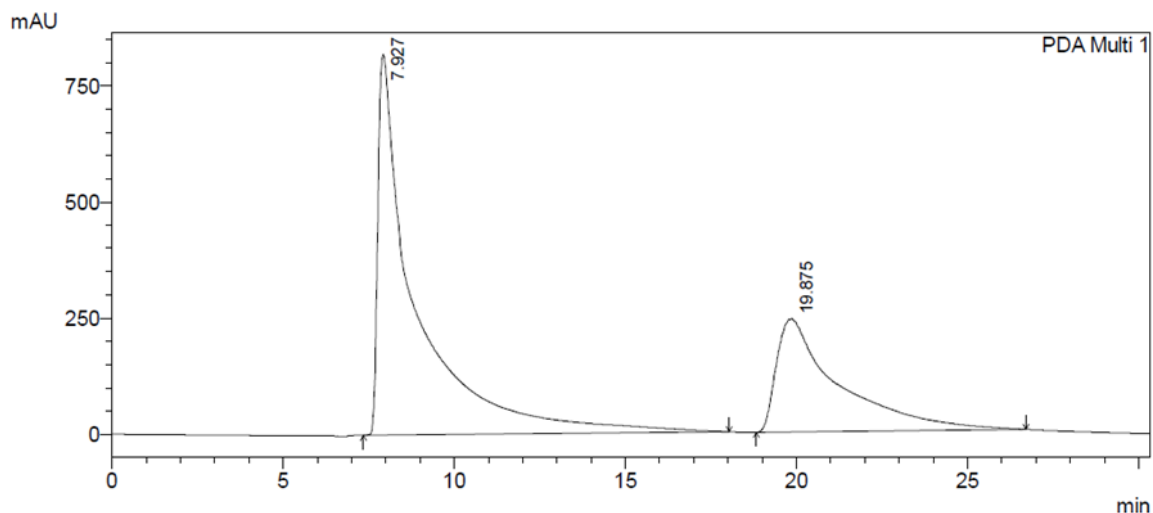

1 PDA Multi 1/254nm 4nm

PeakTable

PDA Ch1 254nm 4nm

| Peak# | Ret. Time | Area     | Height  | Area %  | Height % |
|-------|-----------|----------|---------|---------|----------|
| 1     | 7.927     | 63029324 | 819174  | 67.130  | 76.991   |
| 2     | 19.875    | 30862240 | 244817  | 32.870  | 23.009   |
| Total |           | 93891564 | 1063991 | 100.000 | 100.000  |

**S 57: HPLC spectrum of 4a in the presence of CMPTC (10a) and  $K_2CO_3/H_2O_2$  condition.**

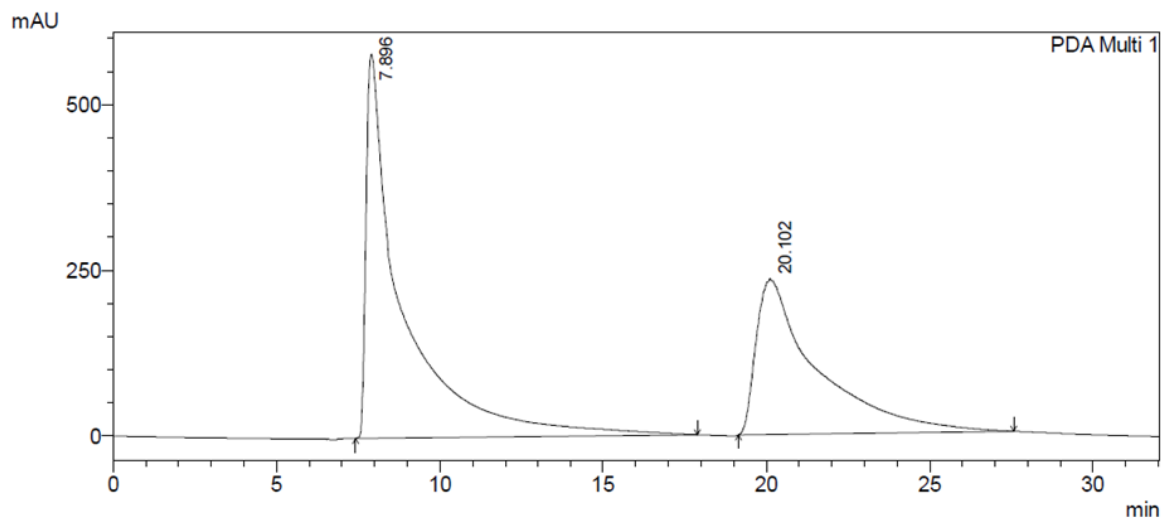

1 PDA Multi 1/254nm 4nm

PeakTable

PDA Ch1 254nm 4nm

| Peak# | Ret. Time | Area     | Height | Area %  | Height % |
|-------|-----------|----------|--------|---------|----------|
| 1     | 7.896     | 44803061 | 579271 | 59.425  | 71.108   |
| 2     | 20.102    | 30591768 | 235366 | 40.575  | 28.892   |
| Total |           | 75394828 | 814637 | 100.000 | 100.000  |

**S 58: HPLC spectrum of 4a in the presence of CMPTC (10b) and  $K_2CO_3/H_2O_2$  condition.**

## Supporting Information

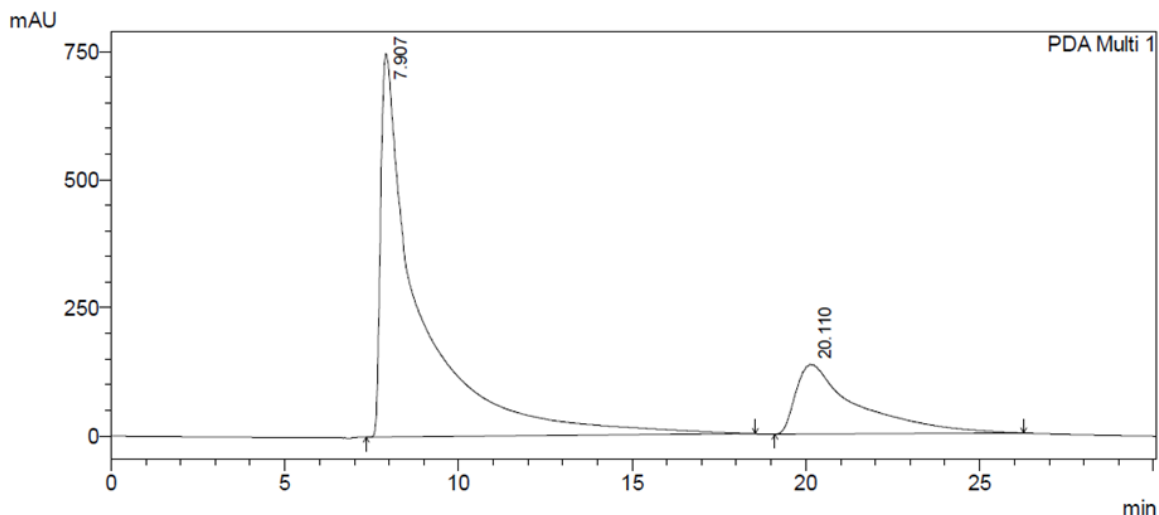

PDA Ch1 254nm 4nm

PeakTable

| Peak# | Ret. Time | Area     | Height | Area %  | Height % |
|-------|-----------|----------|--------|---------|----------|
| 1     | 7.907     | 58116670 | 747366 | 77.796  | 84.598   |
| 2     | 20.110    | 16587564 | 136062 | 22.204  | 15.402   |
| Total |           | 74704234 | 883429 | 100.000 | 100.000  |

### S 59: HPLC spectrum of 4a in the presence of CMPTC (10a) and $K_2CO_3/NaOCl$ condition.

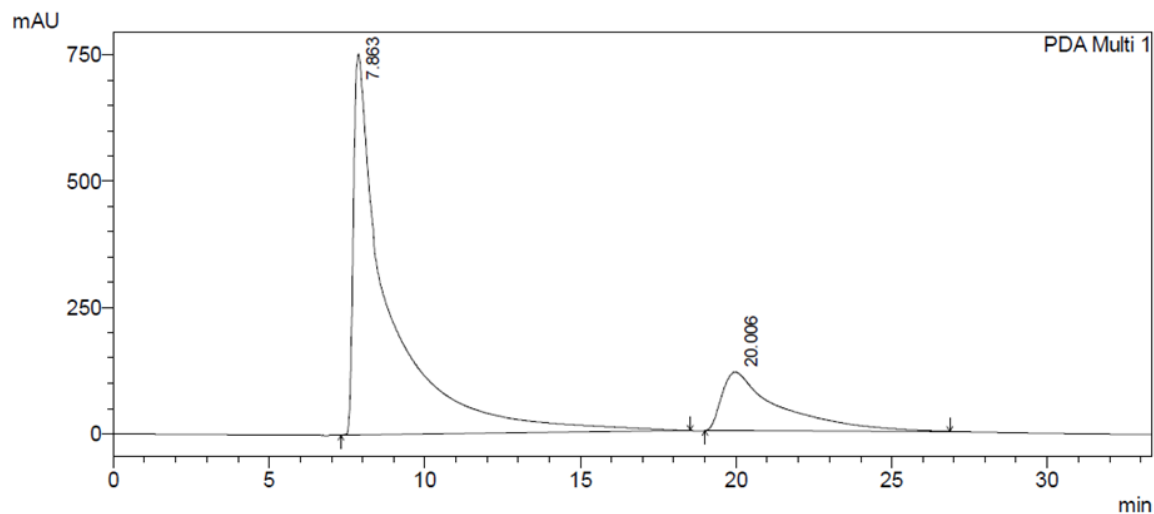

PDA Ch1 254nm 4nm

PeakTable

| Peak# | Ret. Time | Area     | Height | Area %  | Height % |
|-------|-----------|----------|--------|---------|----------|
| 1     | 7.863     | 59077266 | 753103 | 79.998  | 86.633   |
| 2     | 20.006    | 14771069 | 116201 | 20.002  | 13.367   |
| Total |           | 73848335 | 869304 | 100.000 | 100.000  |

### S 60: HPLC spectrum of 4a in the presence of CMPTC (10b) and $K_2CO_3/NaOCl$ condition.



## Supporting Information

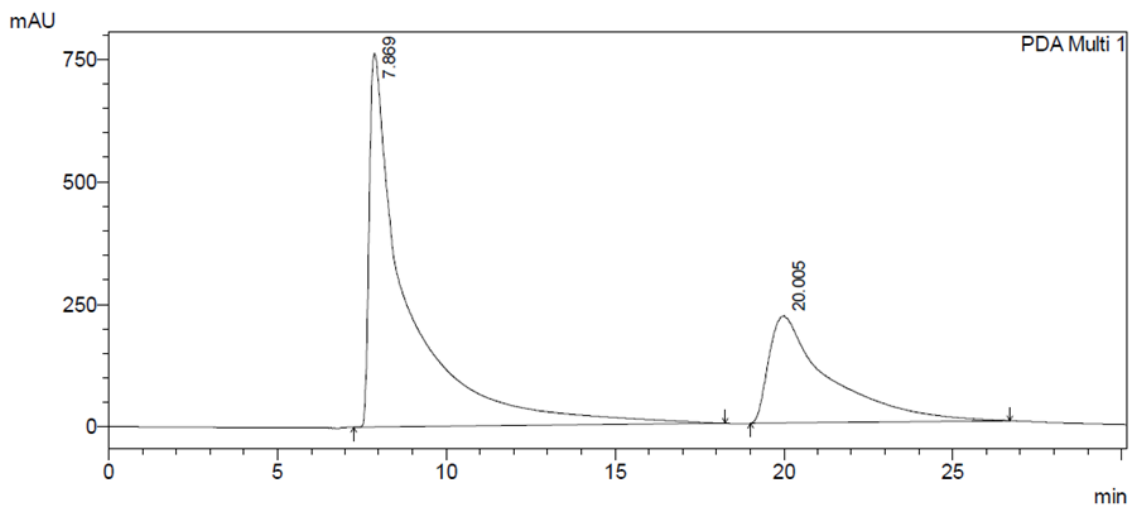

PeakTable

PDA Ch1 254nm 4nm

| Peak# | Ret. Time | Area     | Height | Area %  | Height % |
|-------|-----------|----------|--------|---------|----------|
| 1     | 7.869     | 59722901 | 763703 | 68.682  | 77.663   |
| 2     | 20.005    | 27232277 | 219658 | 31.318  | 22.337   |
| Total |           | 86955178 | 983361 | 100.000 | 100.000  |

**S 61: HPLC spectrum of 4a in the presence of CMPTC (10a) and  $\text{Cs}_2\text{CO}_3/\text{H}_2\text{O}_2$  condition.**

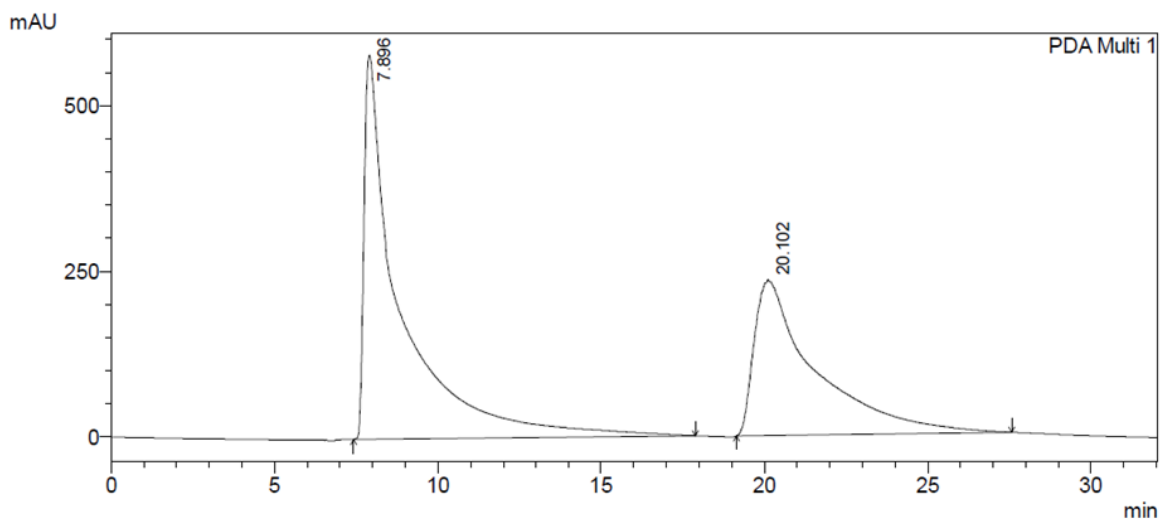

PeakTable

PDA Ch1 254nm 4nm

| Peak# | Ret. Time | Area     | Height | Area %  | Height % |
|-------|-----------|----------|--------|---------|----------|
| 1     | 7.896     | 44803061 | 579271 | 59.425  | 71.108   |
| 2     | 20.102    | 30591768 | 235366 | 40.575  | 28.892   |
| Total |           | 75394828 | 814637 | 100.000 | 100.000  |

**S 62: HPLC spectrum of 4a in the presence of CMPTC (10b) and  $\text{Cs}_2\text{CO}_3/\text{H}_2\text{O}_2$  condition.**

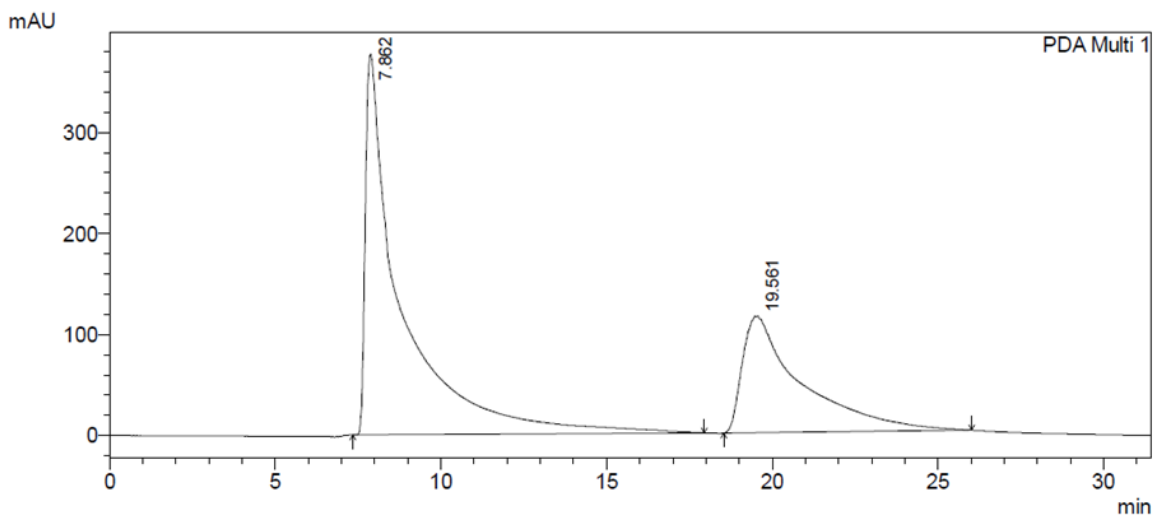

PeakTable

| Peak# | Ret. Time | Area     | Height | Area %  | Height % |
|-------|-----------|----------|--------|---------|----------|
| 1     | 7.862     | 28408505 | 376989 | 66.510  | 76.527   |
| 2     | 19.561    | 14304518 | 115634 | 33.490  | 23.473   |
| Total |           | 42713024 | 492624 | 100.000 | 100.000  |

**S 63: HPLC spectrum of 4a in the presence of CMPTC (10a) and Cs<sub>2</sub>CO<sub>3</sub>/ NaOCl condition.**

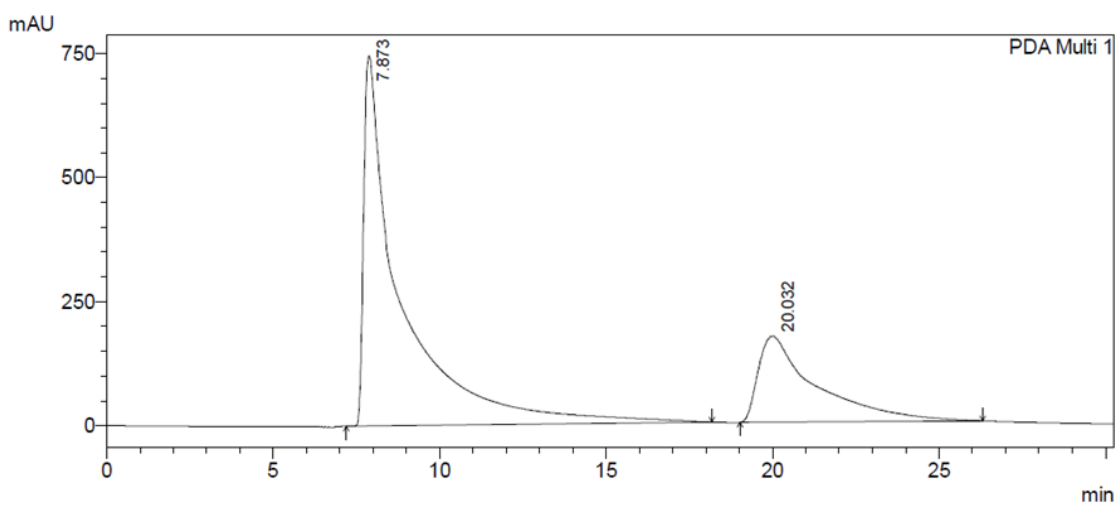

PeakTable

| Peak# | Ret. Time | Area     | Height | Area %  | Height % |
|-------|-----------|----------|--------|---------|----------|
| 1     | 7.873     | 58262728 | 745492 | 73.624  | 81.102   |
| 2     | 20.032    | 20872825 | 173706 | 26.376  | 18.898   |
| Total |           | 79135553 | 919198 | 100.000 | 100.000  |

**S 64: HPLC spectrum of 4a in the presence of CMPTC (10b) and Cs<sub>2</sub>CO<sub>3</sub>/ NaOCl condition.**

## Supporting Information

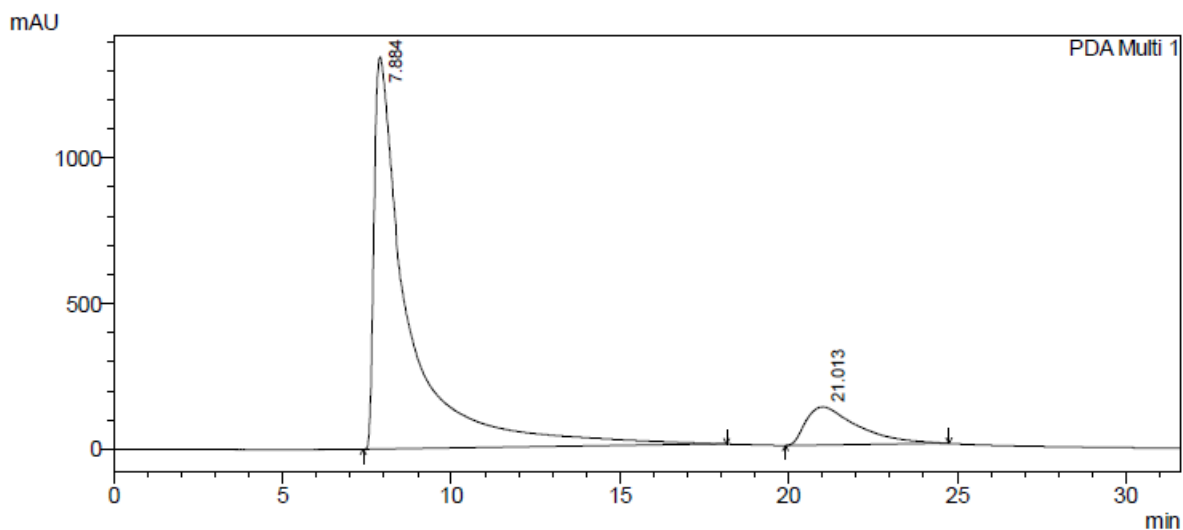

PeakTable

| Peak# | Ret. Time | Area      | Height  | Area %  | Height % |
|-------|-----------|-----------|---------|---------|----------|
| 1     | 7.884     | 95159980  | 1346376 | 87.142  | 91.121   |
| 2     | 21.013    | 14040478  | 131196  | 12.858  | 8.879    |
| Total |           | 109200457 | 1477573 | 100.000 | 100.000  |

**S 65: HPLC spectrum of 4a in the presence of CMPTC (10a) and K<sup>t</sup>OBu/O<sub>2</sub> condition.**

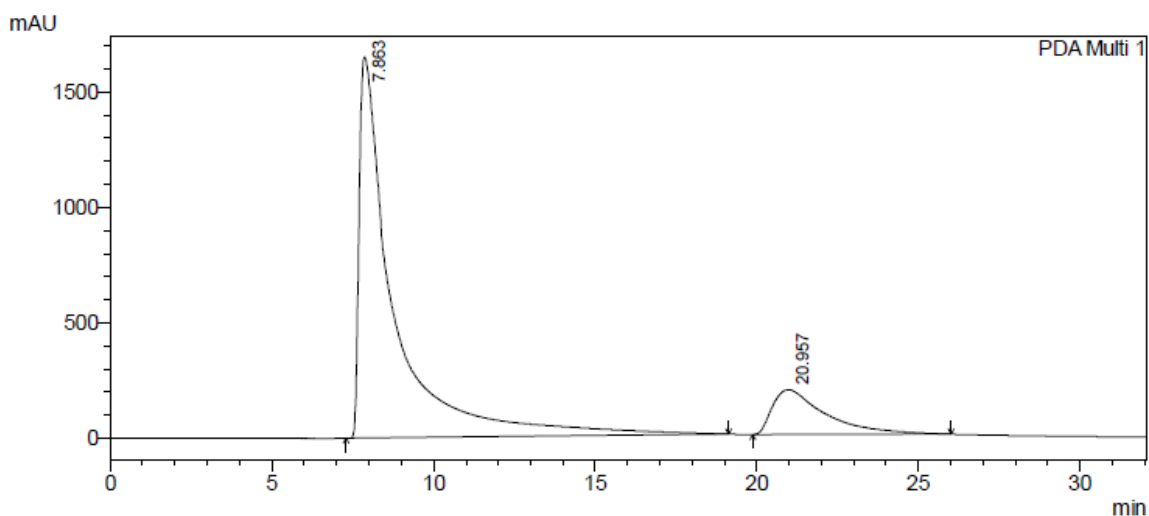

PeakTable

| Peak# | Ret. Time | Area      | Height  | Area %  | Height % |
|-------|-----------|-----------|---------|---------|----------|
| 1     | 7.863     | 123692230 | 1651982 | 84.817  | 89.436   |
| 2     | 20.957    | 22141722  | 195124  | 15.183  | 10.564   |
| Total |           | 145833952 | 1847106 | 100.000 | 100.000  |

**S 66: HPLC spectrum of 4a in the presence of CMPTC (10b) and K<sup>t</sup>OBu/O<sub>2</sub> condition.**

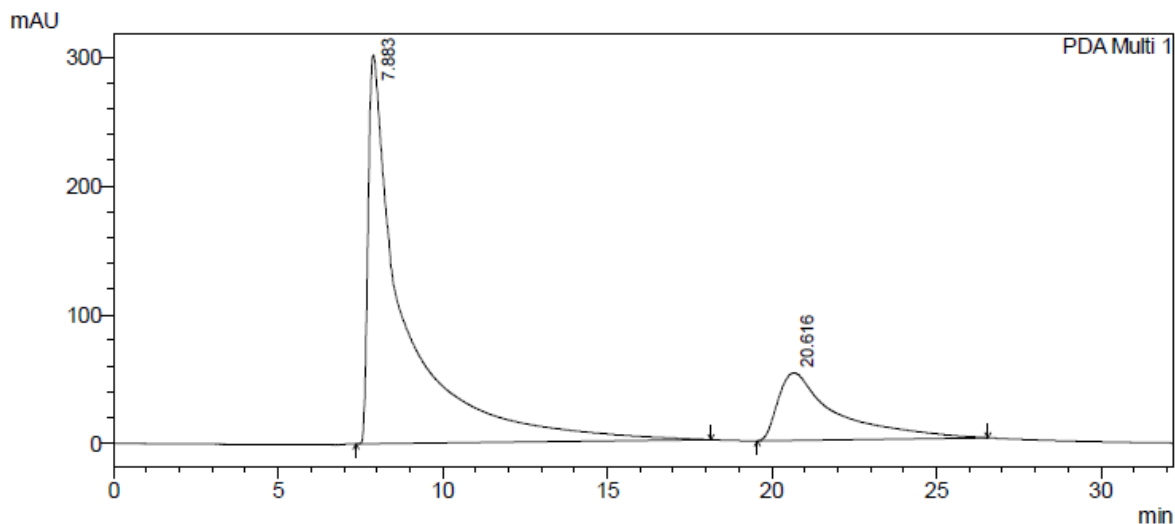

PeakTable

| Peak# | Ret. Time | Area     | Height | Area %  | Height % |
|-------|-----------|----------|--------|---------|----------|
| 1     | 7.883     | 23180738 | 301901 | 78.299  | 85.159   |
| 2     | 20.616    | 6424572  | 52614  | 21.701  | 14.841   |
| Total |           | 29605310 | 354515 | 100.000 | 100.000  |

**S 67: HPLC spectrum of 4a in the presence of CMPTC (10a) and K<sup>t</sup>OBu/ PMS condition.**

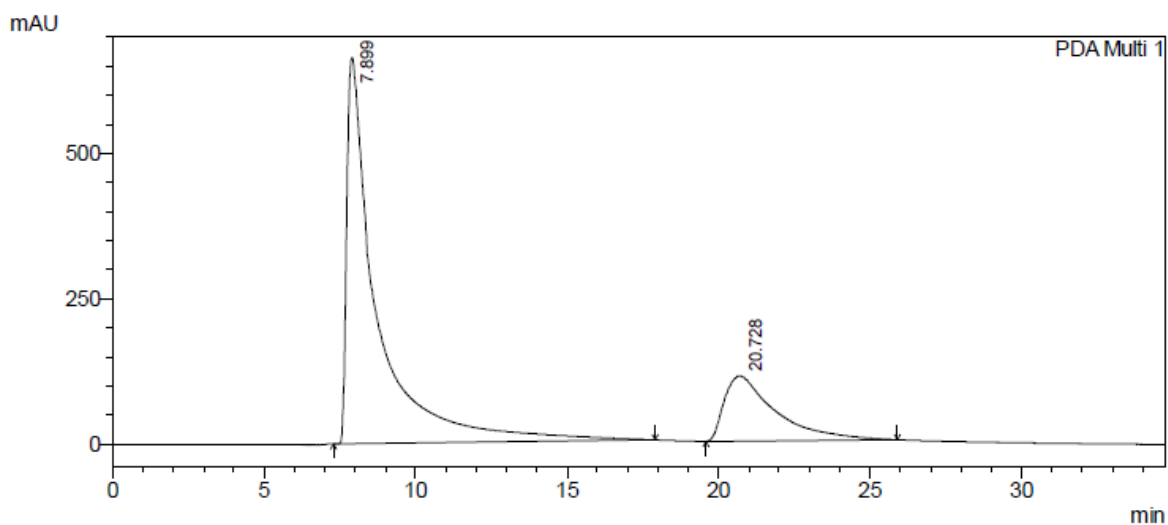

PeakTable

| Peak# | Ret. Time | Area     | Height | Area %  | Height % |
|-------|-----------|----------|--------|---------|----------|
| 1     | 7.899     | 46058693 | 663658 | 77.790  | 85.538   |
| 2     | 20.728    | 13150608 | 112209 | 22.210  | 14.462   |
| Total |           | 59209301 | 775867 | 100.000 | 100.000  |

**S 68: HPLC spectrum of 4a in the presence of CMPTC (10b) and K<sup>t</sup>OBu/ PMS condition.**

## Supporting Information

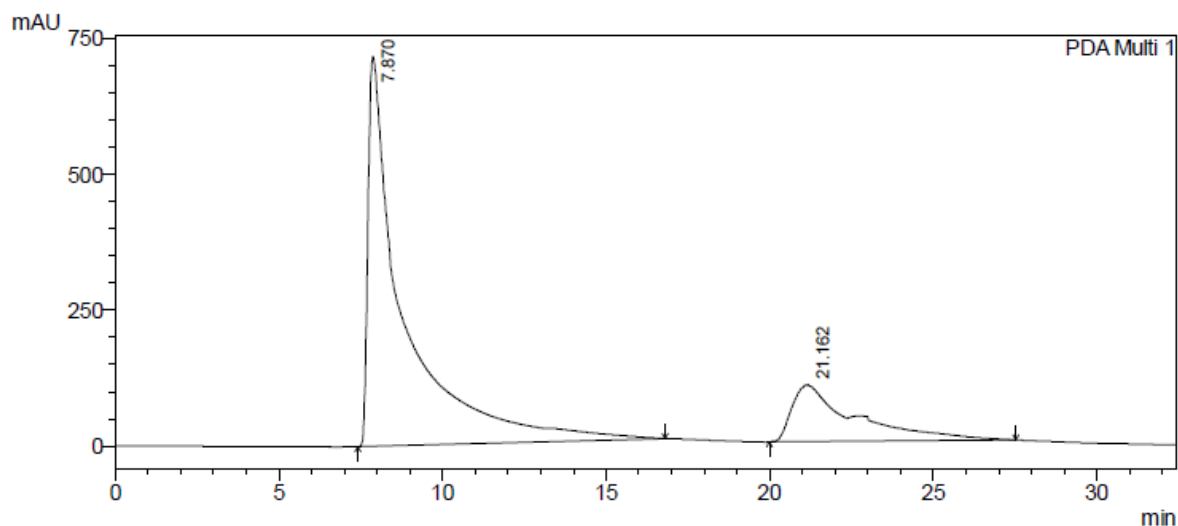

PeakTable

PDA Ch1 254nm 4nm

| Peak# | Ret. Time | Area     | Height | Area %  | Height % |
|-------|-----------|----------|--------|---------|----------|
| 1     | 7.870     | 54619257 | 717319 | 79.648  | 87.274   |
| 2     | 21.162    | 13956671 | 104600 | 20.352  | 12.726   |
| Total |           | 68575928 | 821919 | 100.000 | 100.000  |

**S 69: HPLC spectrum of 4a in the presence of CMPTC (10a) and K<sup>t</sup>OBu/ APS condition.**

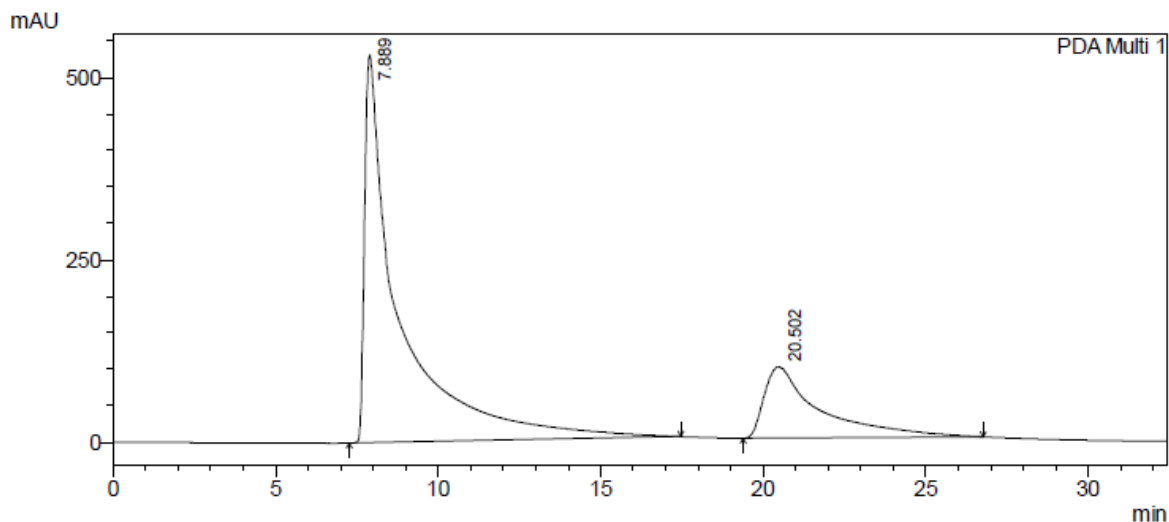

PeakTable

PDA Ch1 254nm 4nm

| Peak# | Ret. Time | Area     | Height | Area %  | Height % |
|-------|-----------|----------|--------|---------|----------|
| 1     | 7.889     | 39672934 | 530913 | 77.340  | 84.410   |
| 2     | 20.502    | 11623650 | 98056  | 22.660  | 15.590   |
| Total |           | 51296584 | 628970 | 100.000 | 100.000  |

**S 70: HPLC spectrum of 4a in the presence of CMPTC (11b) and K<sup>t</sup>OBu/ APS condition.**

## Supporting Information

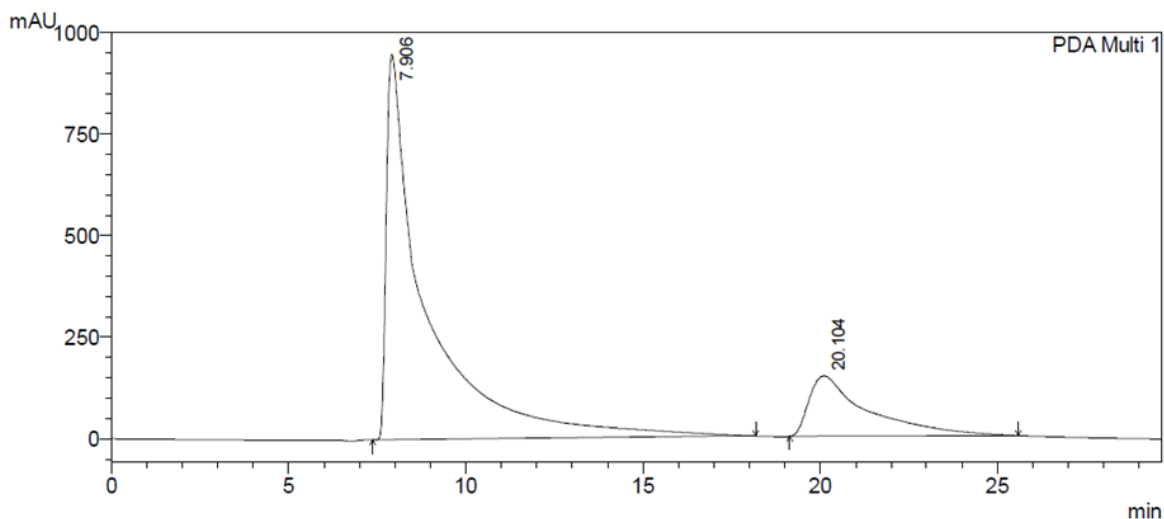

PeakTable

| Peak# | Ret. Time | Area     | Height  | Area %  | Height % |
|-------|-----------|----------|---------|---------|----------|
| 1     | 7.906     | 74234860 | 948445  | 81.232  | 86.377   |
| 2     | 20.104    | 17151253 | 149585  | 18.768  | 13.623   |
| Total |           | 91386113 | 1098030 | 100.000 | 100.000  |

**S 71: HPLC spectrum of 4a in the presence of 1 mol% of CMPTC (10a) and K<sup>t</sup>OBu/NaOCl condition.**

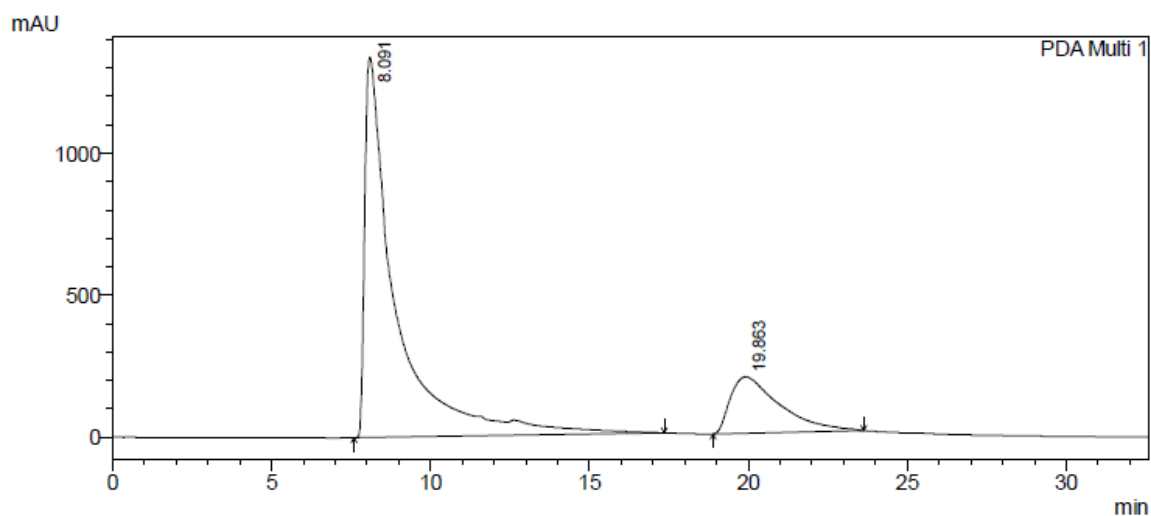

PeakTable

| Peak# | Ret. Time | Area      | Height  | Area %  | Height % |
|-------|-----------|-----------|---------|---------|----------|
| 1     | 8.091     | 90825096  | 1339385 | 80.879  | 87.046   |
| 2     | 19.863    | 21472798  | 199323  | 19.121  | 12.954   |
| Total |           | 112297894 | 1538708 | 100.000 | 100.000  |

**S 72: HPLC spectrum of 4a in the presence of 3 mol% of CMPTC (10a) and K<sup>t</sup>OBu/NaOCl condition.**



PeakTable

| Peak# | Ret. Time | Area     | Height | Area %  | Height % |
|-------|-----------|----------|--------|---------|----------|
| 1     | 7.808     | 58495258 | 780820 | 80.586  | 86.071   |
| 2     | 19.289    | 14092196 | 126359 | 19.414  | 13.929   |
| Total |           | 72587454 | 907179 | 100.000 | 100.000  |

**S 73: HPLC spectrum of 4a in the presence of 5 mol% of CMPTC (10a) and K<sup>t</sup>OBu/NaOCl condition.**

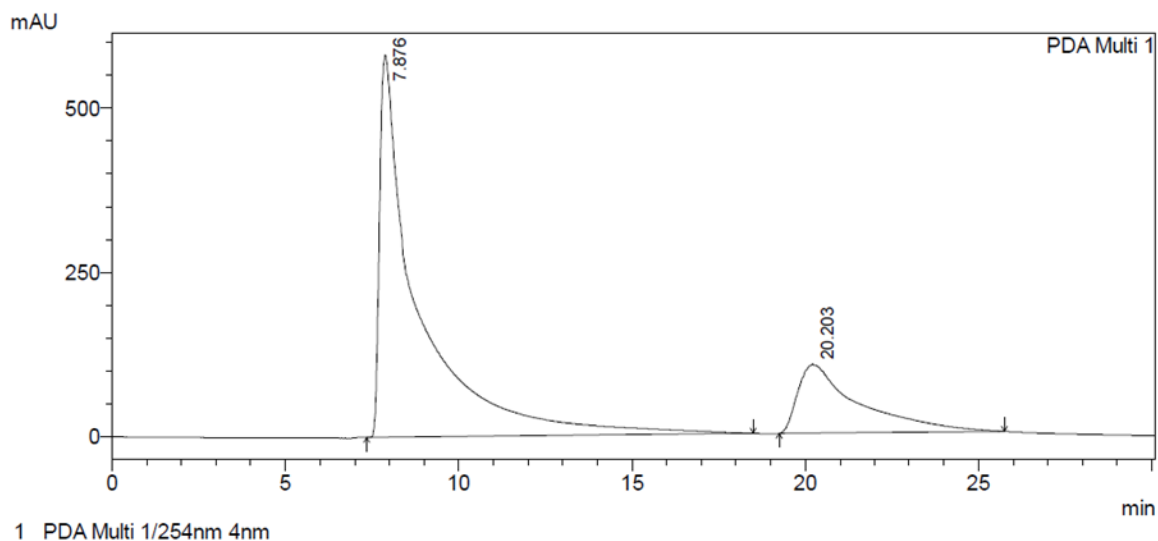

PeakTable

| Peak# | Ret. Time | Area     | Height | Area %  | Height % |
|-------|-----------|----------|--------|---------|----------|
| 1     | 7.876     | 45121261 | 581107 | 78.003  | 84.734   |
| 2     | 20.203    | 12724564 | 104694 | 21.997  | 15.266   |
| Total |           | 57845826 | 685801 | 100.000 | 100.000  |

**S 74: HPLC spectrum of 4a in the presence of 10 mol% of CMPTC (10a) and K<sup>t</sup>OBu/NaOCl condition.**

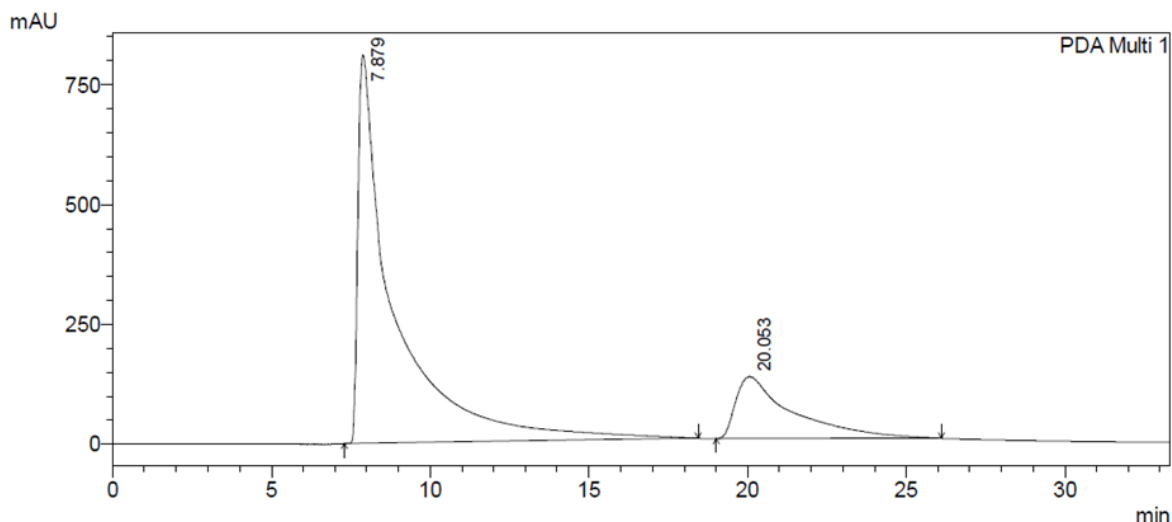

PeakTable

PDA Ch1 254nm 4nm

| Peak# | Ret. Time | Area     | Height | Area %  | Height % |
|-------|-----------|----------|--------|---------|----------|
| 1     | 7.879     | 64762441 | 810865 | 80.132  | 86.149   |
| 2     | 20.053    | 16057488 | 130373 | 19.868  | 13.851   |
| Total |           | 80819928 | 941238 | 100.000 | 100.000  |

**S 75: HPLC spectrum of 4a in the presence of 15 mol% of CMPTC (10a) and K<sup>t</sup>OBu/NaOCl condition.**

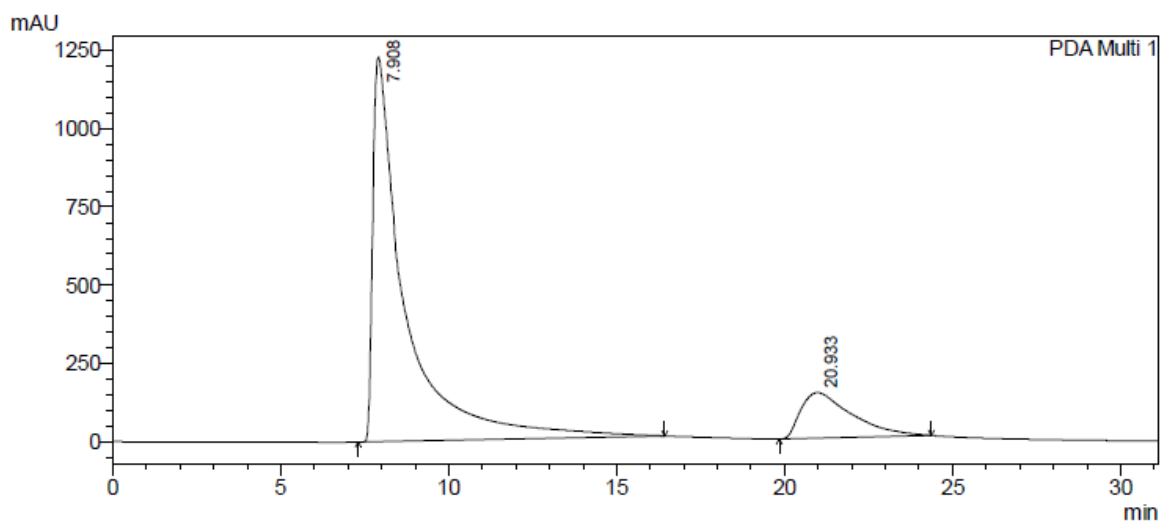

PeakTable

PDA Ch1 254nm 4nm

| Peak# | Ret. Time | Area     | Height  | Area %  | Height % |
|-------|-----------|----------|---------|---------|----------|
| 1     | 7.908     | 82476300 | 1229240 | 84.189  | 89.337   |
| 2     | 20.933    | 15489060 | 146722  | 15.811  | 10.663   |
| Total |           | 97965360 | 1375962 | 100.000 | 100.000  |

**S 76: HPLC spectrum of 4a in the presence of 1 mol% of CMPTC (10b) and K<sup>t</sup>OBu/NaOCl condition.**



## Supporting Information

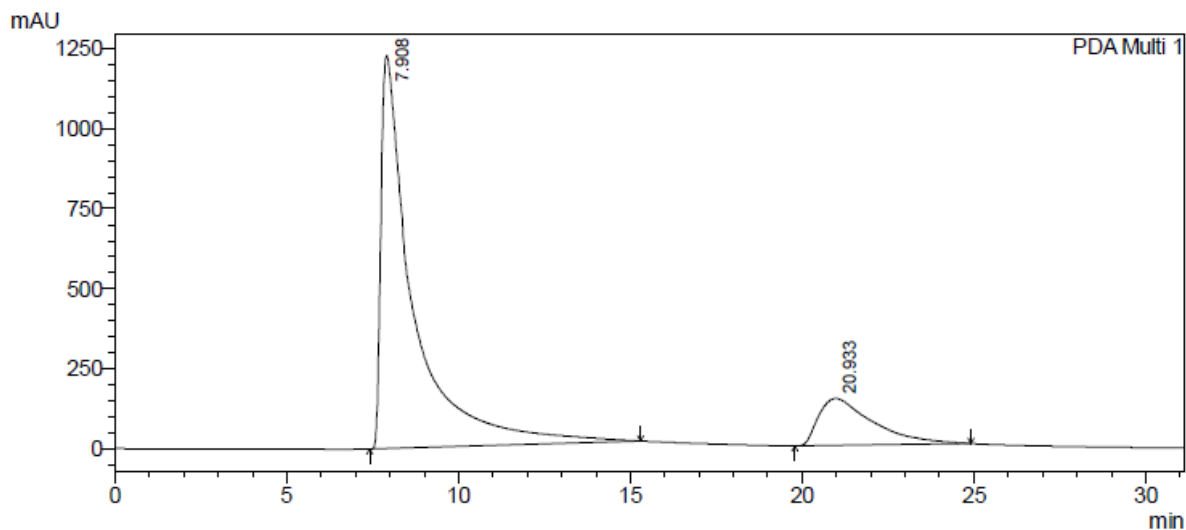

PeakTable

PDA Ch1 254nm 4nm

| Peak# | Ret. Time | Area     | Height  | Area %  | Height % |
|-------|-----------|----------|---------|---------|----------|
| 1     | 7.908     | 80349127 | 1228849 | 83.209  | 89.260   |
| 2     | 20.933    | 16213425 | 147865  | 16.791  | 10.740   |
| Total |           | 96562551 | 1376714 | 100.000 | 100.000  |

**S 77: HPLC spectrum of 4a in the presence of 3 mol% of CMPTC (10b) and K<sup>t</sup>OBu/NaOCl condition.**

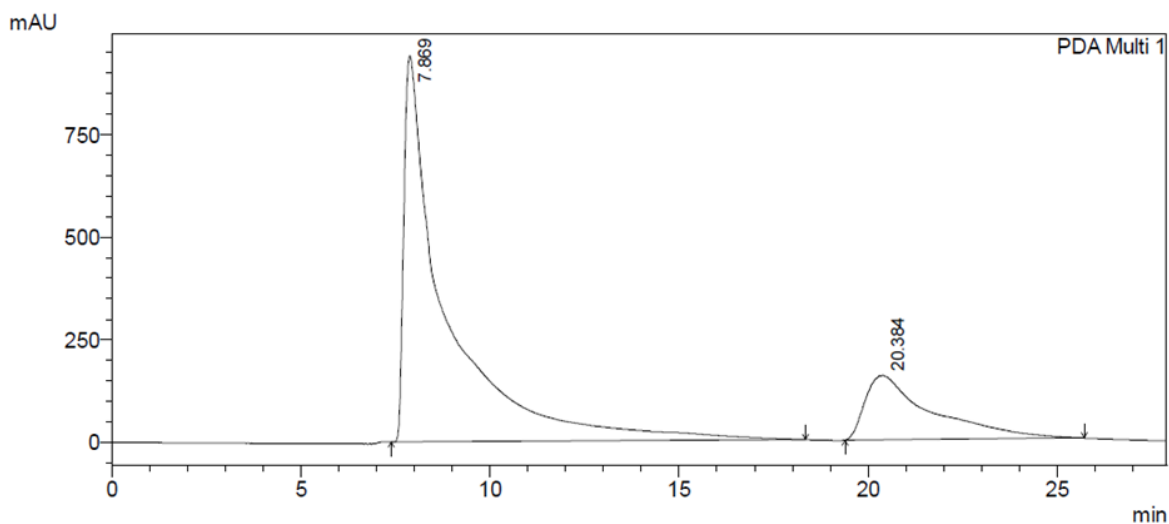

PeakTable

PDA Ch1 254nm 4nm

| Peak# | Ret. Time | Area     | Height  | Area %  | Height % |
|-------|-----------|----------|---------|---------|----------|
| 1     | 7.869     | 73304641 | 941379  | 79.347  | 85.658   |
| 2     | 20.384    | 19080246 | 157624  | 20.653  | 14.342   |
| Total |           | 92384887 | 1099003 | 100.000 | 100.000  |

**S 78: HPLC spectrum of 4a in the presence of 5 mol% of CMPTC (10b) and K<sup>t</sup>OBu/NaOCl condition.**



PeakTable

| Peak# | Ret. Time | Area     | Height  | Area %  | Height % |
|-------|-----------|----------|---------|---------|----------|
| 1     | 7.906     | 74234860 | 948445  | 81.232  | 86.377   |
| 2     | 20.104    | 17151253 | 149585  | 18.768  | 13.623   |
| Total |           | 91386113 | 1098030 | 100.000 | 100.000  |

**S 79: HPLC spectrum of 4a in the presence of 10 mol% of CMPTC (10b) and K<sup>t</sup>OBu/NaOCl condition.**

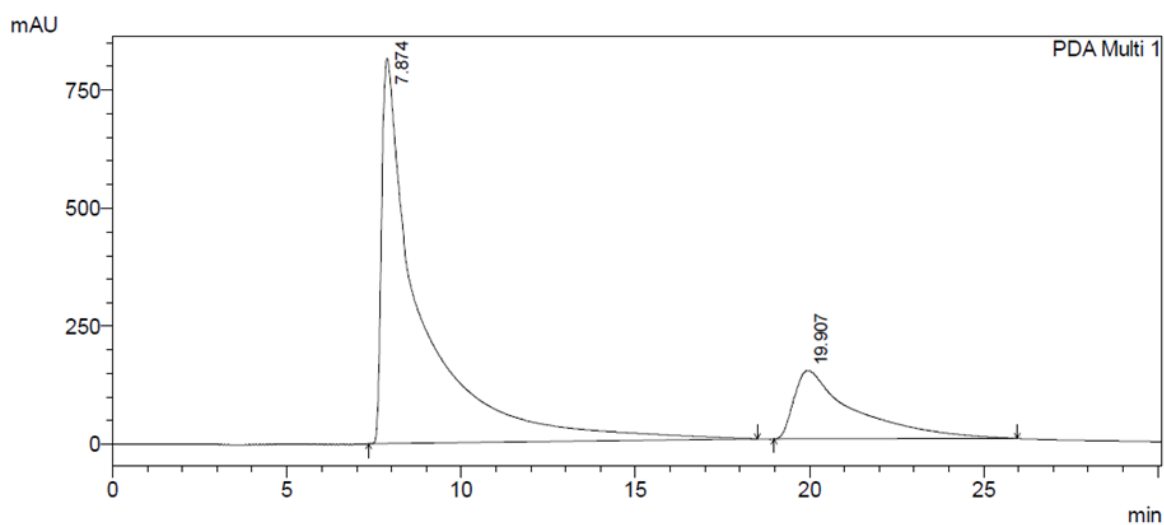

PeakTable

| Peak# | Ret. Time | Area     | Height | Area %  | Height % |
|-------|-----------|----------|--------|---------|----------|
| 1     | 7.874     | 64200405 | 816497 | 78.620  | 84.880   |
| 2     | 19.907    | 17458835 | 145451 | 21.380  | 15.120   |
| Total |           | 81659240 | 961947 | 100.000 | 100.000  |

**S 80: HPLC spectrum of 4a in the presence of 15 mol% of CMPTC (10b) and K<sup>t</sup>OBu/NaOCl condition.**

## Supporting Information

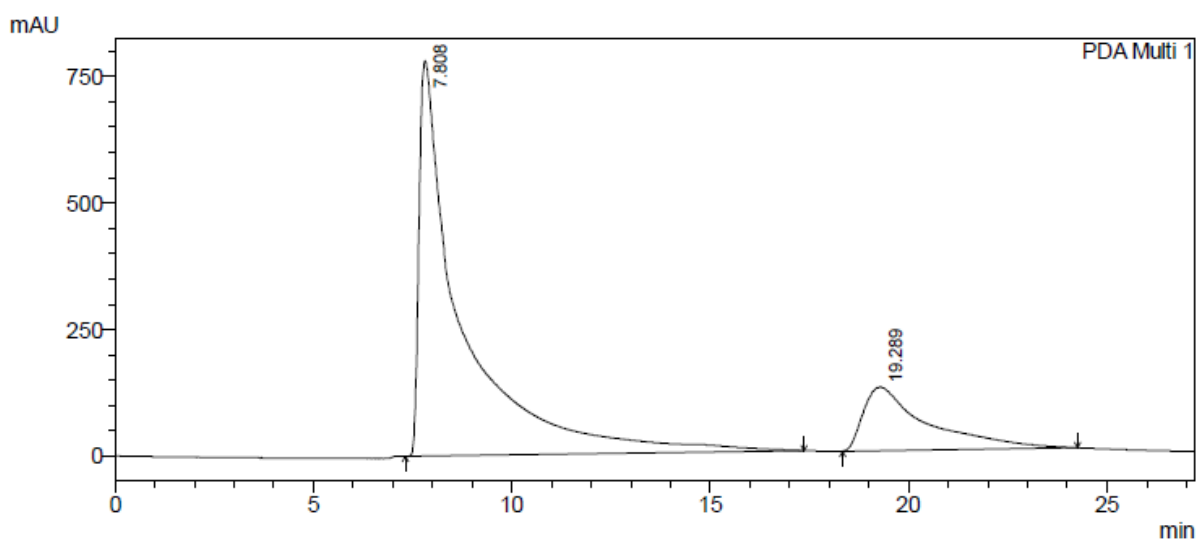

PeakTable

| Peak# | Ret. Time | Area     | Height | Area %  | Height % |
|-------|-----------|----------|--------|---------|----------|
| 1     | 7.808     | 58495258 | 780820 | 80.586  | 86.071   |
| 2     | 19.289    | 14092196 | 126359 | 19.414  | 13.929   |
| Total |           | 72587454 | 907179 | 100.000 | 100.000  |

**S 81: HPLC spectrum of 4a in the presence of CMPTCs (10a) and K<sup>t</sup>OBu/NaOCl condition.**

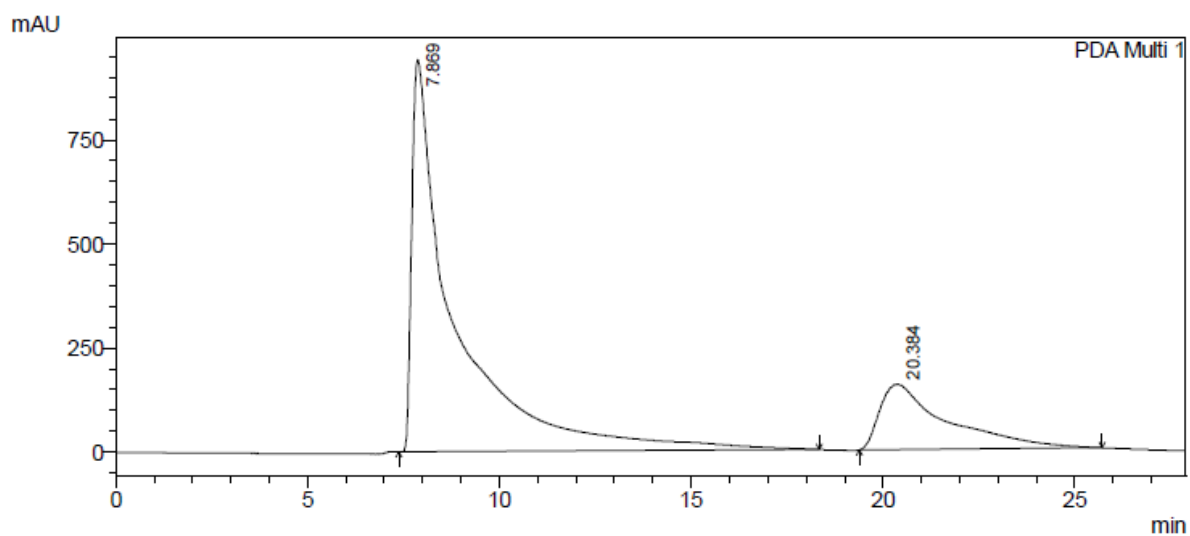

PeakTable

| Peak# | Ret. Time | Area     | Height  | Area %  | Height % |
|-------|-----------|----------|---------|---------|----------|
| 1     | 7.869     | 73304641 | 941379  | 79.347  | 85.658   |
| 2     | 20.384    | 19080246 | 157624  | 20.653  | 14.342   |
| Total |           | 92384887 | 1099003 | 100.000 | 100.000  |

**S 82: HPLC spectrum of 4a in the presence of CMPTCs (10b) and K<sup>t</sup>OBu/NaOCl condition.**

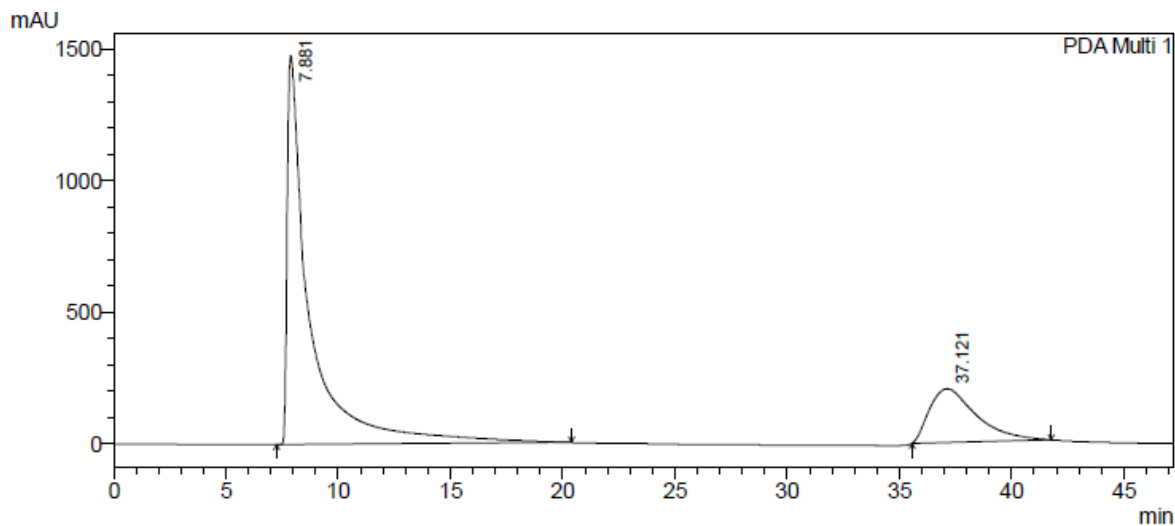

PeakTable

PDA Ch1 254nm 4nm

| Peak# | Ret. Time | Area      | Height  | Area %  | Height % |
|-------|-----------|-----------|---------|---------|----------|
| 1     | 7.881     | 103920403 | 1478508 | 77.778  | 87.822   |
| 2     | 37.121    | 29690929  | 205023  | 22.222  | 12.178   |
| Total |           | 133611333 | 1683531 | 100.000 | 100.000  |

**S 83: HPLC spectrum of 4b in the presence of CMPTCs (10a) and K<sup>+</sup>OBU/NaOCl condition.**

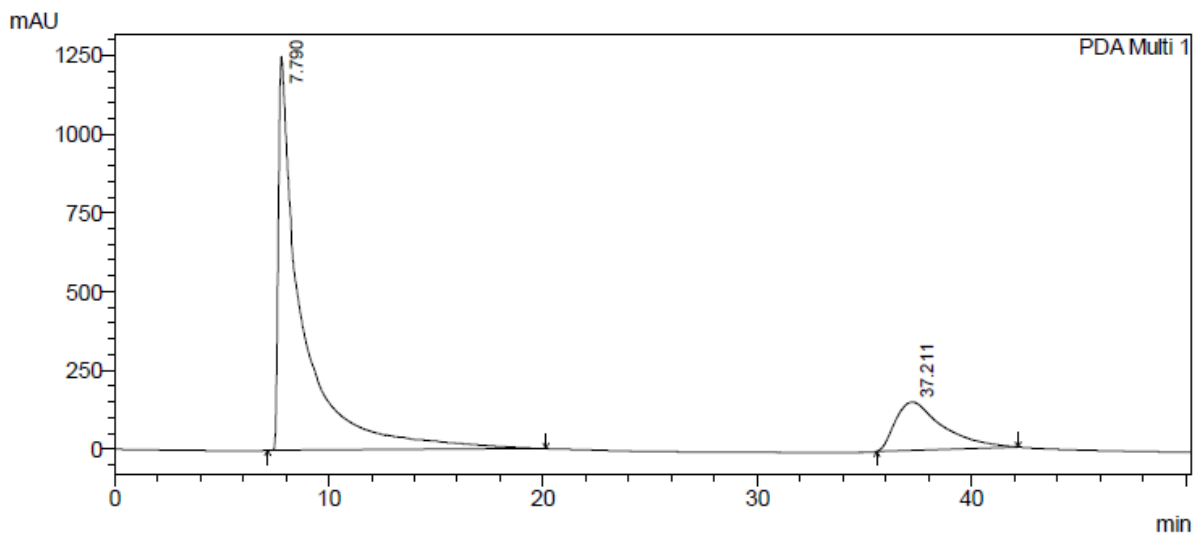

PeakTable

PDA Ch1 254nm 4nm

| Peak# | Ret. Time | Area      | Height  | Area %  | Height % |
|-------|-----------|-----------|---------|---------|----------|
| 1     | 7.790     | 94686876  | 1249027 | 80.058  | 89.034   |
| 2     | 37.211    | 23585725  | 153840  | 19.942  | 10.966   |
| Total |           | 118272601 | 1402868 | 100.000 | 100.000  |

**S 84: HPLC spectrum of 4b in the presence of CMPTCs (10b) and K<sup>+</sup>OBU/NaOCl condition.**

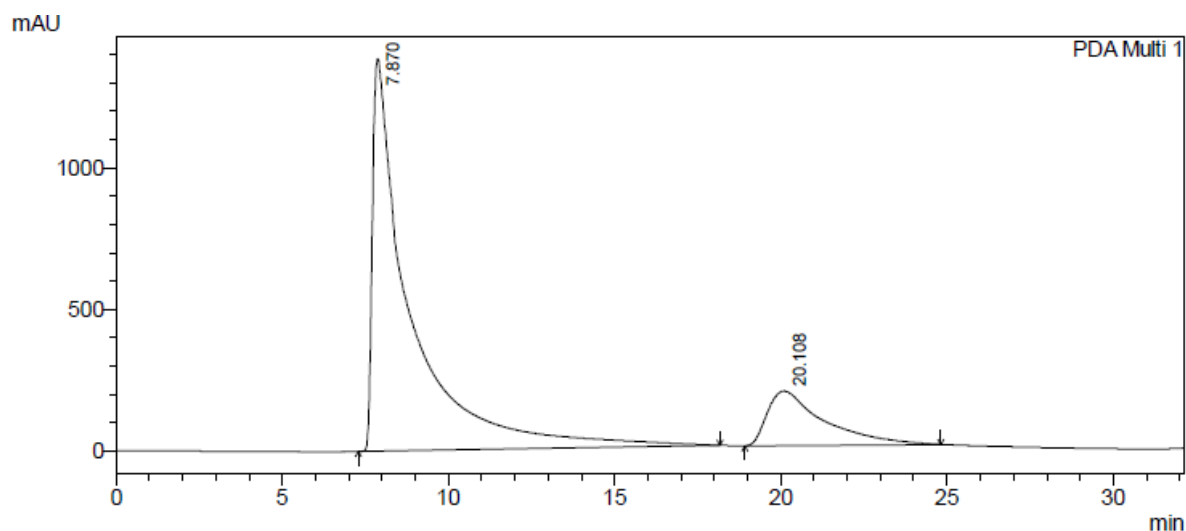

PeakTable

| Peak# | Ret. Time | Area      | Height  | Area %  | Height % |
|-------|-----------|-----------|---------|---------|----------|
| 1     | 7.870     | 109928313 | 1387466 | 82.819  | 87.755   |
| 2     | 20.108    | 22805302  | 193595  | 17.181  | 12.245   |
| Total |           | 132733615 | 1581061 | 100.000 | 100.000  |

**S 85: HPLC spectrum of 4c in the presence of CMPTCs (10a) and K<sup>t</sup>OBu/NaOCl condition.**

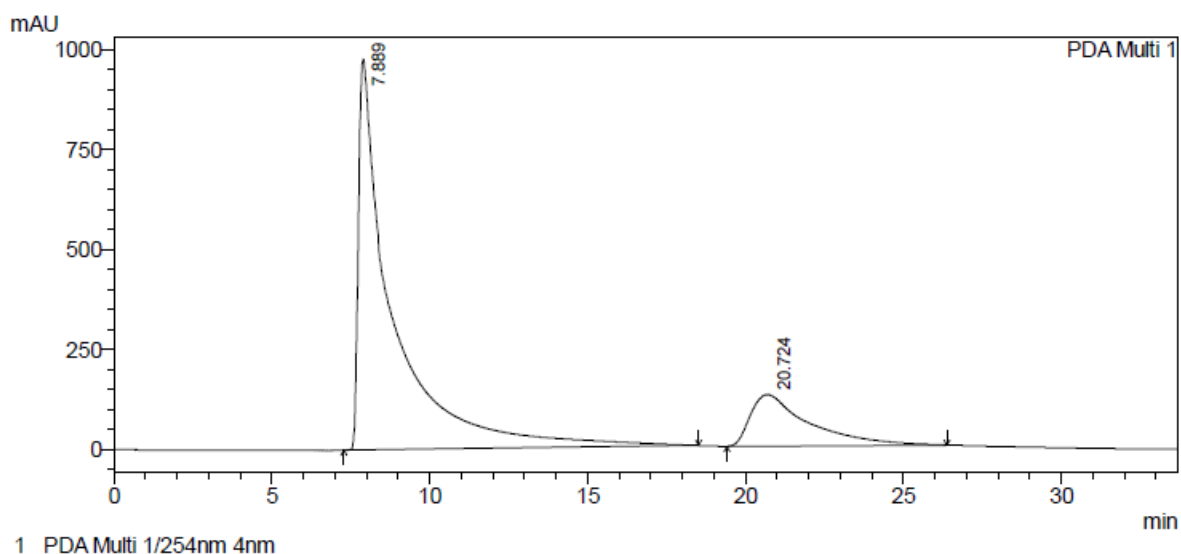

PeakTable

| Peak# | Ret. Time | Area     | Height  | Area %  | Height % |
|-------|-----------|----------|---------|---------|----------|
| 1     | 7.889     | 73169319 | 975861  | 81.604  | 88.315   |
| 2     | 20.724    | 16494515 | 129117  | 18.396  | 11.685   |
| Total |           | 89663834 | 1104978 | 100.000 | 100.000  |

**S 86: HPLC spectrum of 4c in the presence of CMPTCs (10b) and K<sup>t</sup>OBu/NaOCl condition.**

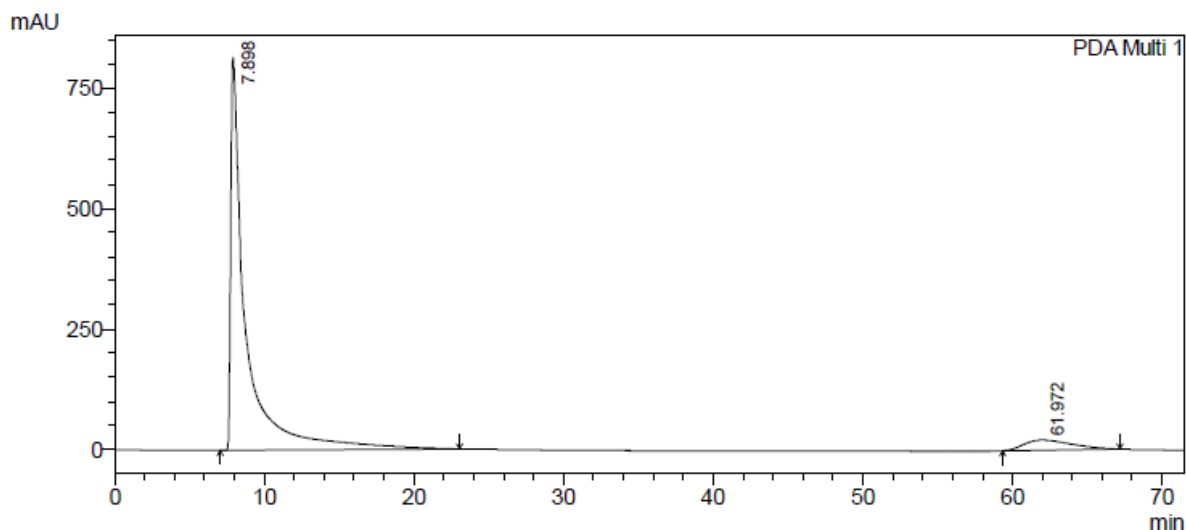

PeakTable

PDA Ch1 254nm 4nm

| Peak# | Ret. Time | Area     | Height | Area %  | Height % |
|-------|-----------|----------|--------|---------|----------|
| 1     | 7.898     | 56742198 | 813778 | 92.469  | 97.488   |
| 2     | 61.972    | 4621317  | 20965  | 7.531   | 2.512    |
| Total |           | 61363515 | 834744 | 100.000 | 100.000  |

**S 87: HPLC spectrum of 4d in the presence of CMPTCs (10a) and K<sup>t</sup>OBu/NaOCl condition.**

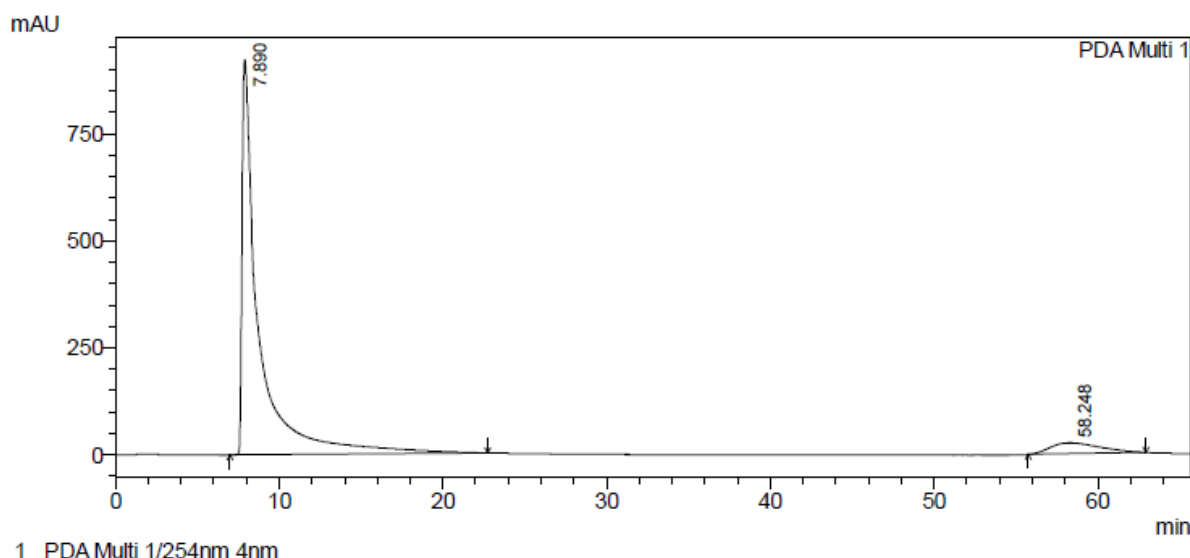

PeakTable

PDA Ch1 254nm 4nm

| Peak# | Ret. Time | Area     | Height | Area %  | Height % |
|-------|-----------|----------|--------|---------|----------|
| 1     | 7.890     | 65513766 | 922889 | 92.460  | 97.302   |
| 2     | 58.248    | 5342664  | 25588  | 7.540   | 2.698    |
| Total |           | 70856430 | 948477 | 100.000 | 100.000  |

**S 88: HPLC spectrum of 4d in the presence of CMPTCs (10b) and K<sup>t</sup>OBu/NaOCl condition.**

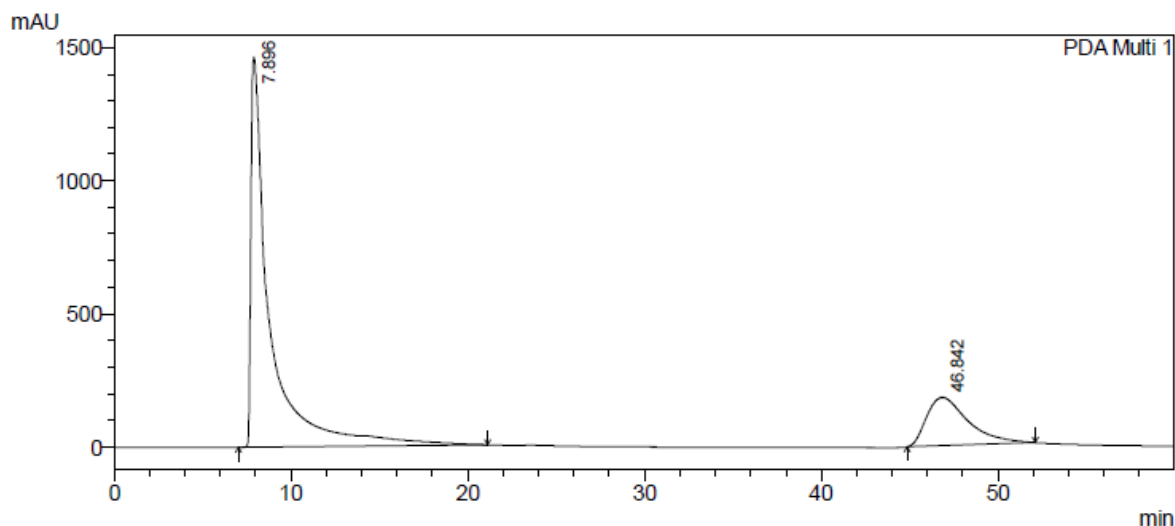

PeakTable

PDA Ch1 254nm 4nm

| Peak# | Ret. Time | Area      | Height  | Area %  | Height % |
|-------|-----------|-----------|---------|---------|----------|
| 1     | 7.896     | 108039149 | 1463424 | 78.385  | 88.916   |
| 2     | 46.842    | 29792738  | 182417  | 21.615  | 11.084   |
| Total |           | 137831887 | 1645841 | 100.000 | 100.000  |

**S 89: HPLC spectrum of 4e in the presence of CMPTCs (10a) and K<sup>t</sup>OBu/NaOCl condition.**

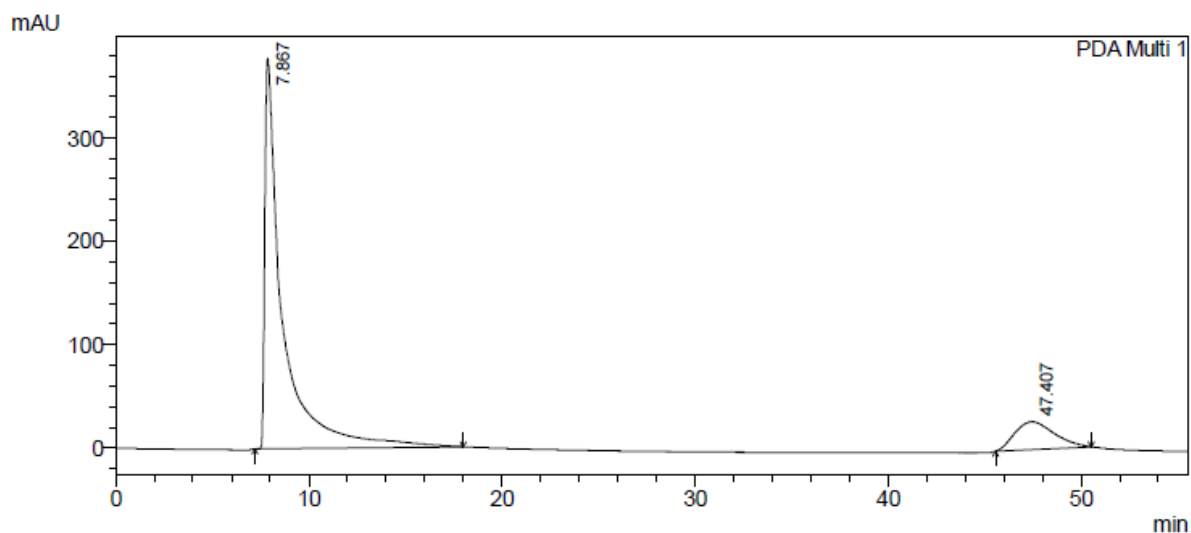

PeakTable

PDA Ch1 254nm 4nm

| Peak# | Ret. Time | Area     | Height | Area %  | Height % |
|-------|-----------|----------|--------|---------|----------|
| 1     | 7.867     | 24206970 | 377437 | 86.330  | 93.313   |
| 2     | 47.407    | 3833205  | 27046  | 13.670  | 6.687    |
| Total |           | 28040175 | 404483 | 100.000 | 100.000  |

**S 90: HPLC spectrum of 4e in the presence of CMPTCs (10b) and K<sup>t</sup>OBu/NaOCl condition.**

**Supporting Information**

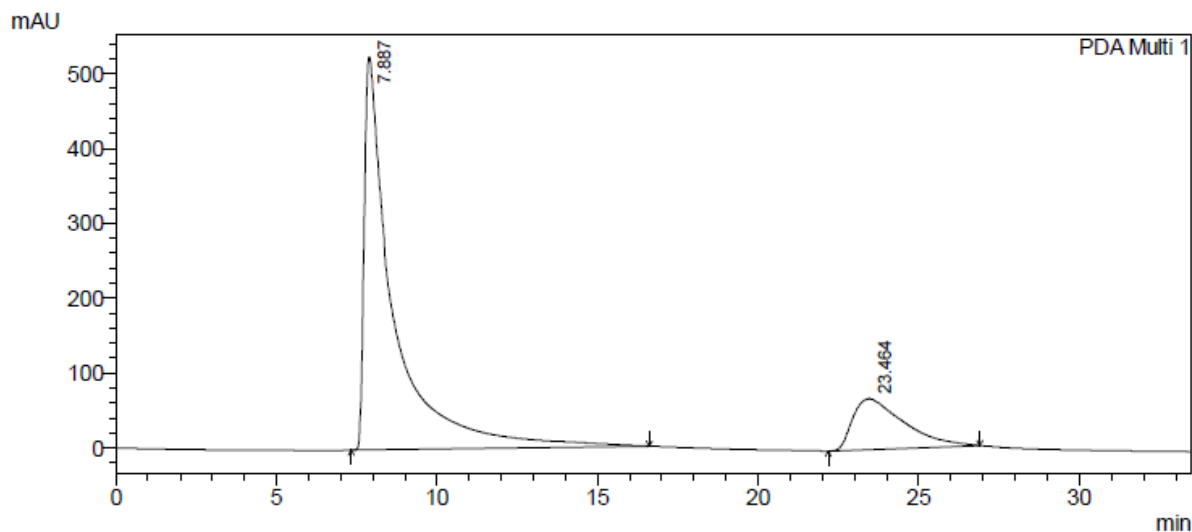

PeakTable

| Peak# | Ret. Time | Area     | Height | Area %  | Height % |
|-------|-----------|----------|--------|---------|----------|
| 1     | 7.887     | 33365253 | 524805 | 81.672  | 88.465   |
| 2     | 23.464    | 7487717  | 68430  | 18.328  | 11.535   |
| Total |           | 40852970 | 593235 | 100.000 | 100.000  |

**S 91: HPLC spectrum of 4f in the presence of CMPTCs (10a) and K<sup>t</sup>OBu/NaOCl condition.**

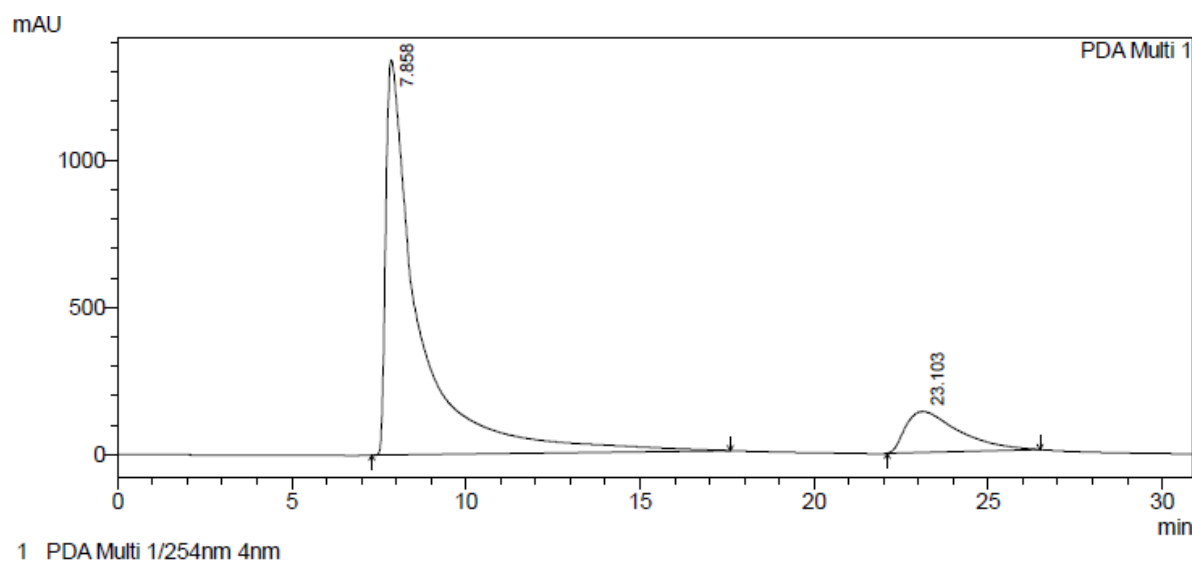

PeakTable

| Peak# | Ret. Time | Area      | Height  | Area %  | Height % |
|-------|-----------|-----------|---------|---------|----------|
| 1     | 7.858     | 88552673  | 1342609 | 85.619  | 90.549   |
| 2     | 23.103    | 14873599  | 140136  | 14.381  | 9.451    |
| Total |           | 103426273 | 1482746 | 100.000 | 100.000  |

**S 92: HPLC spectrum of 4f in the presence of CMPTCs (10b) and K<sup>t</sup>OBu/NaOCl condition.**



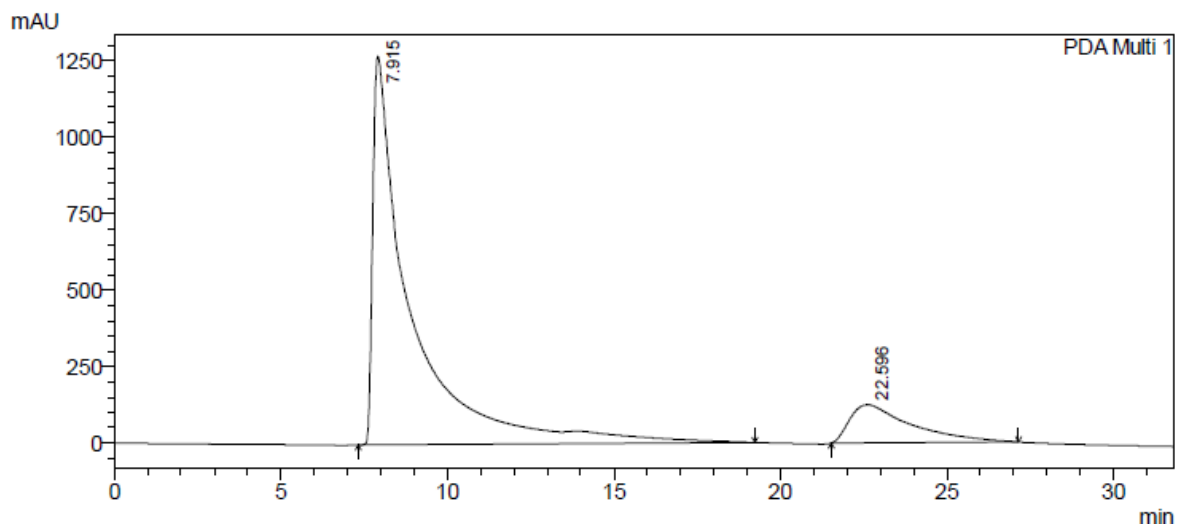

PeakTable

PDA Ch1 254nm 4nm

| Peak# | Ret. Time | Area      | Height  | Area %  | Height % |
|-------|-----------|-----------|---------|---------|----------|
| 1     | 7.915     | 100086741 | 1267818 | 86.231  | 90.961   |
| 2     | 22.596    | 15981867  | 125988  | 13.769  | 9.039    |
| Total |           | 116068608 | 1393806 | 100.000 | 100.000  |

**S 93: HPLC spectrum of 4g in the presence of CMPTCs (10a) and K<sup>+</sup>OBU/NaOCl condition.**

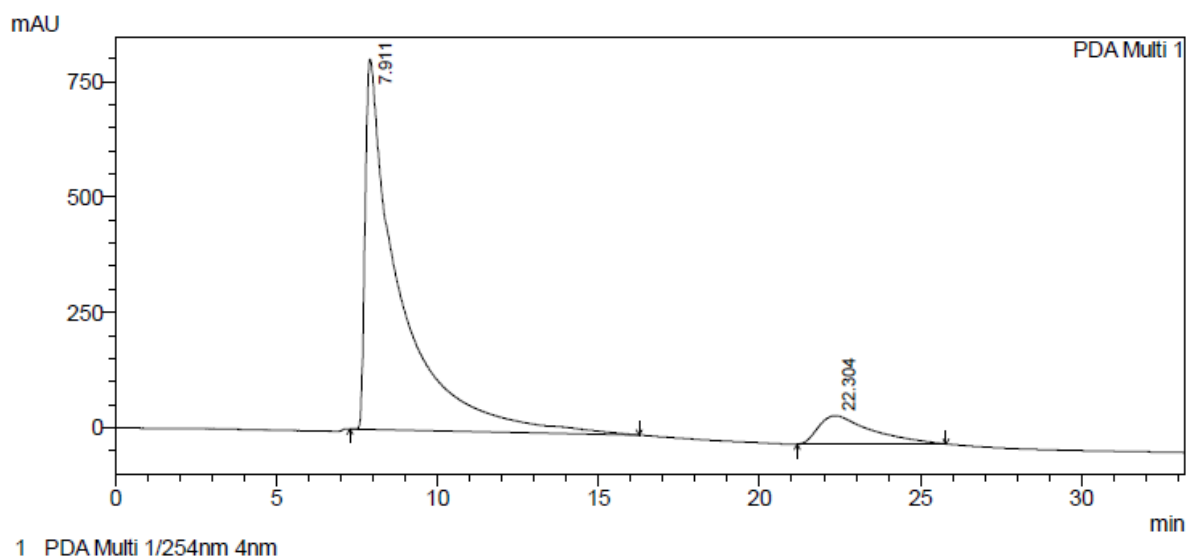

PeakTable

PDA Ch1 254nm 4nm

| Peak# | Ret. Time | Area     | Height | Area %  | Height % |
|-------|-----------|----------|--------|---------|----------|
| 1     | 7.911     | 59537156 | 802160 | 89.347  | 92.841   |
| 2     | 22.304    | 7098571  | 61859  | 10.653  | 7.159    |
| Total |           | 66635728 | 864019 | 100.000 | 100.000  |

**S 94: HPLC spectrum of 4g in the presence of CMPTCs (10b) and K<sup>+</sup>OBU/NaOCl condition.**

**Supporting Information**

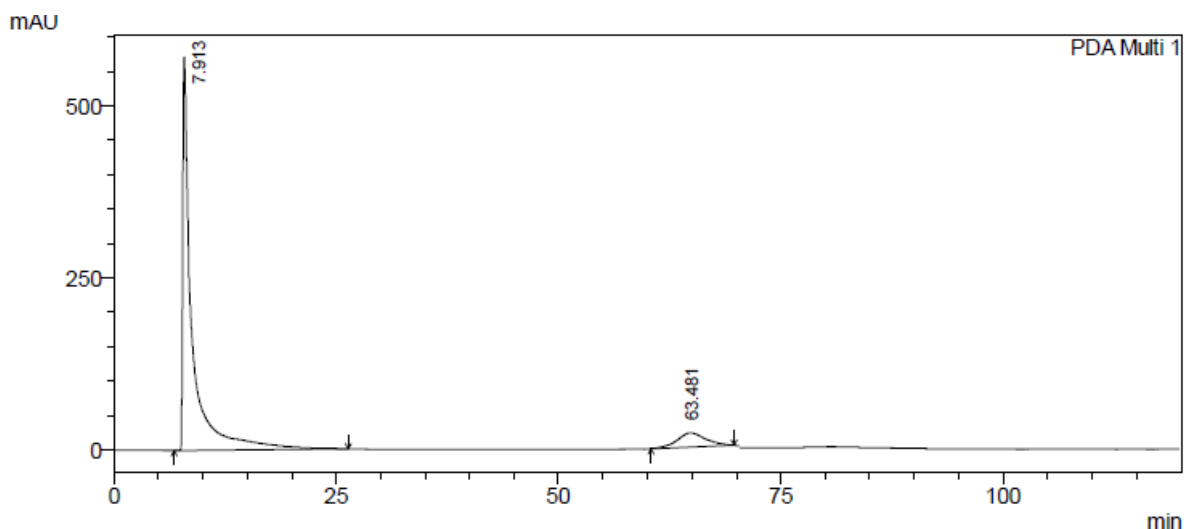

PeakTable

PDA Ch1 254nm 4nm

| Peak# | Ret. Time | Area     | Height | Area %  | Height % |
|-------|-----------|----------|--------|---------|----------|
| 1     | 7.913     | 41115620 | 571284 | 97.957  | 99.449   |
| 2     | 63.481    | 857526   | 3163   | 2.043   | 0.551    |
| Total |           | 41973146 | 574447 | 100.000 | 100.000  |

**S 95: HPLC spectrum of 4h in the presence of CMPTCs (10a) and K<sup>t</sup>OBu/NaOCl condition.**

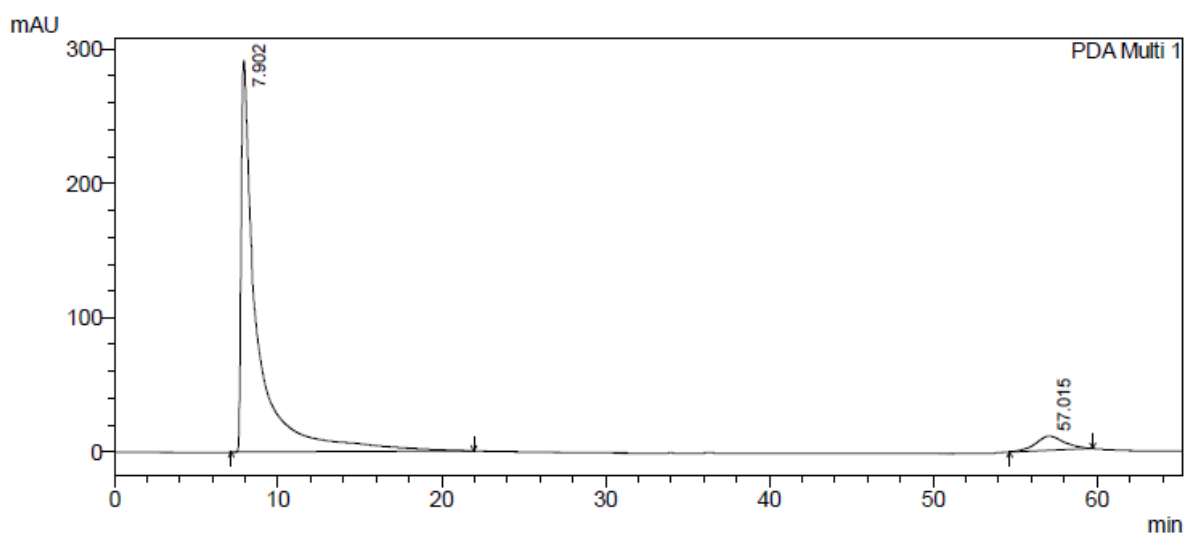

PeakTable

PDA Ch1 254nm 4nm

| Peak# | Ret. Time | Area     | Height | Area %  | Height % |
|-------|-----------|----------|--------|---------|----------|
| 1     | 7.902     | 19722088 | 291776 | 93.892  | 96.490   |
| 2     | 57.015    | 1282964  | 10614  | 6.108   | 3.510    |
| Total |           | 21005052 | 302390 | 100.000 | 100.000  |

**S 96: HPLC spectrum of 4h in the presence of CMPTCs (10b) and K<sup>t</sup>OBu/NaOCl condition.**

## Supporting Information

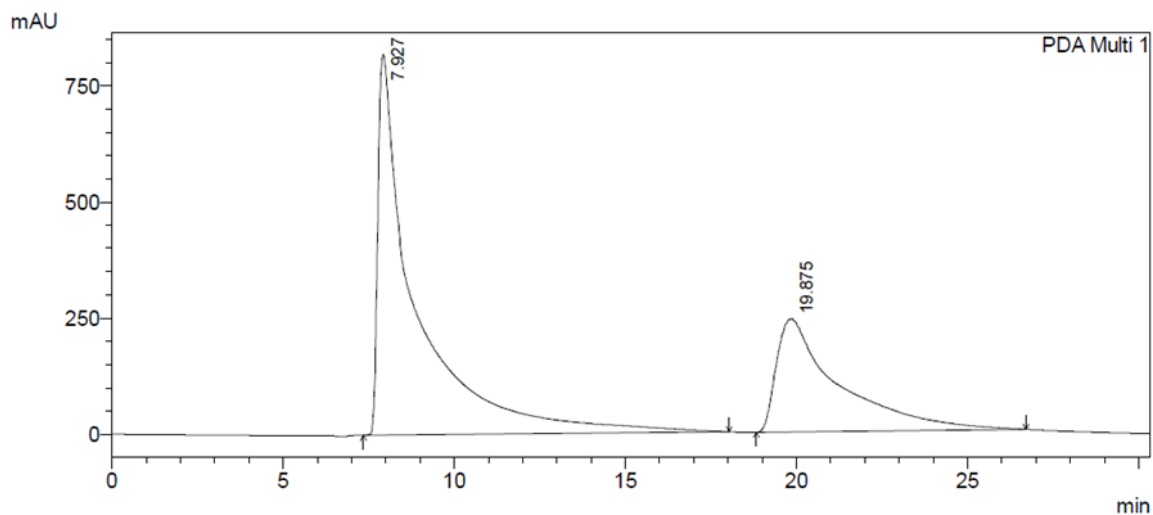

1 PDA Multi 1/254nm 4nm

PeakTable

PDA Ch1 254nm 4nm

| Peak# | Ret. Time | Area     | Height  | Area %  | Height % |
|-------|-----------|----------|---------|---------|----------|
| 1     | 7.927     | 63029324 | 819174  | 67.130  | 76.991   |
| 2     | 19.875    | 30862240 | 244817  | 32.870  | 23.009   |
| Total |           | 93891564 | 1063991 | 100.000 | 100.000  |

**S 97: HPLC spectrum of 4a in the presence of CMPTCs (10a) and K<sup>+</sup>OBu/NaOCl at 10°C.**

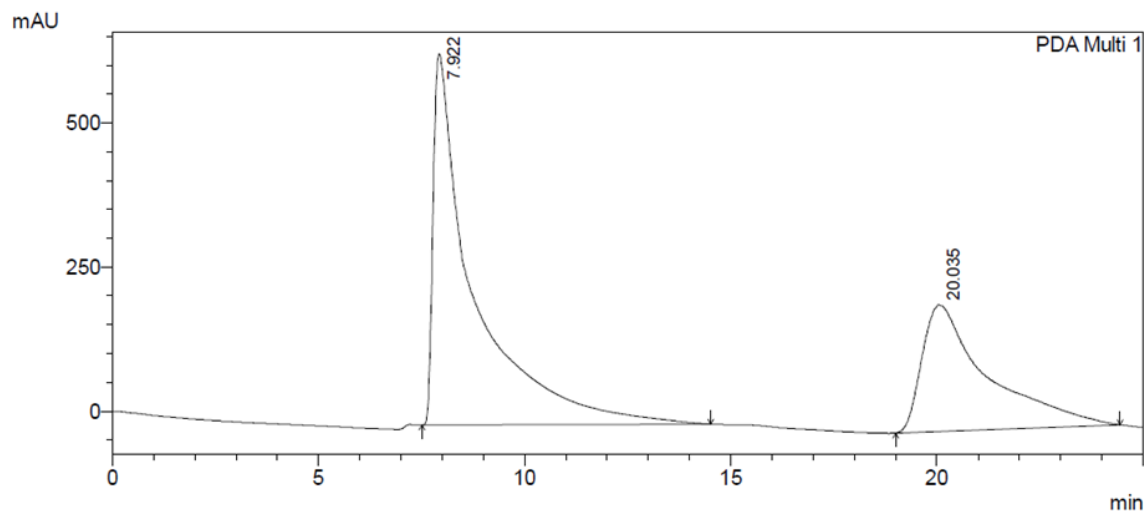

1 PDA Multi 1/254nm 4nm

PeakTable

PDA Ch1 254nm 4nm

| Peak# | Ret. Time | Area     | Height | Area %  | Height % |
|-------|-----------|----------|--------|---------|----------|
| 1     | 7.922     | 44027272 | 643831 | 64.576  | 74.554   |
| 2     | 20.035    | 24151986 | 219749 | 35.424  | 25.446   |
| Total |           | 68179258 | 863580 | 100.000 | 100.000  |

**S 98: HPLC spectrum of 4a in the presence of CMPTCs (10b) and K<sup>+</sup>OBu/NaOCl at 10°C.**

## Supporting Information

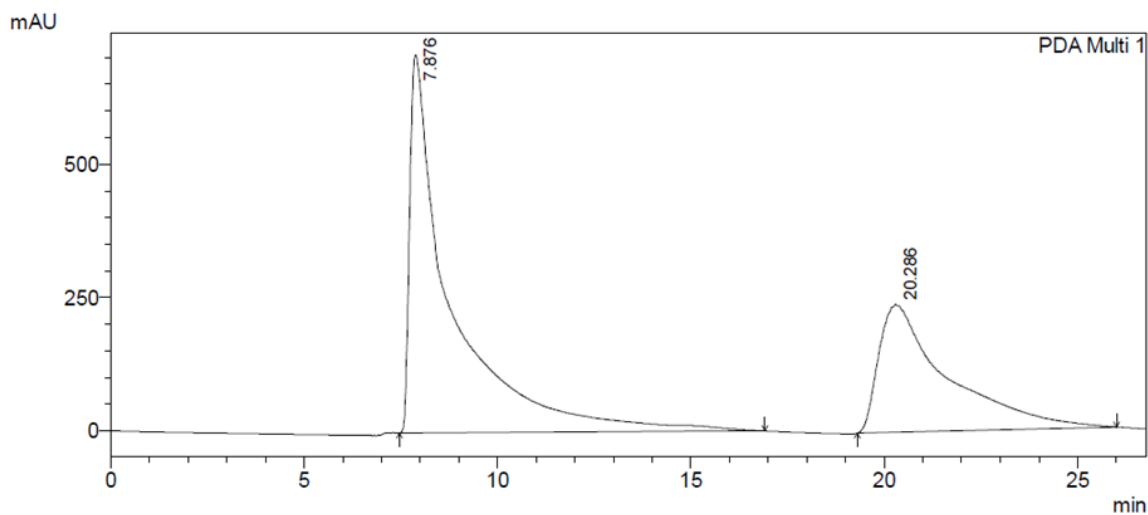

1 PDA Multi 1/254nm 4nm

PeakTable

PDA Ch1 254nm 4nm

| Peak# | Ret. Time | Area     | Height | Area %  | Height % |
|-------|-----------|----------|--------|---------|----------|
| 1     | 7.876     | 52668009 | 709037 | 64.138  | 74.698   |
| 2     | 20.286    | 29448349 | 240171 | 35.862  | 25.302   |
| Total |           | 82116359 | 949208 | 100.000 | 100.000  |

**S 99: HPLC spectrum of 4a in the presence of CMPTCs (10a) and K<sup>t</sup>OBu/NaOCl at -10°C.**

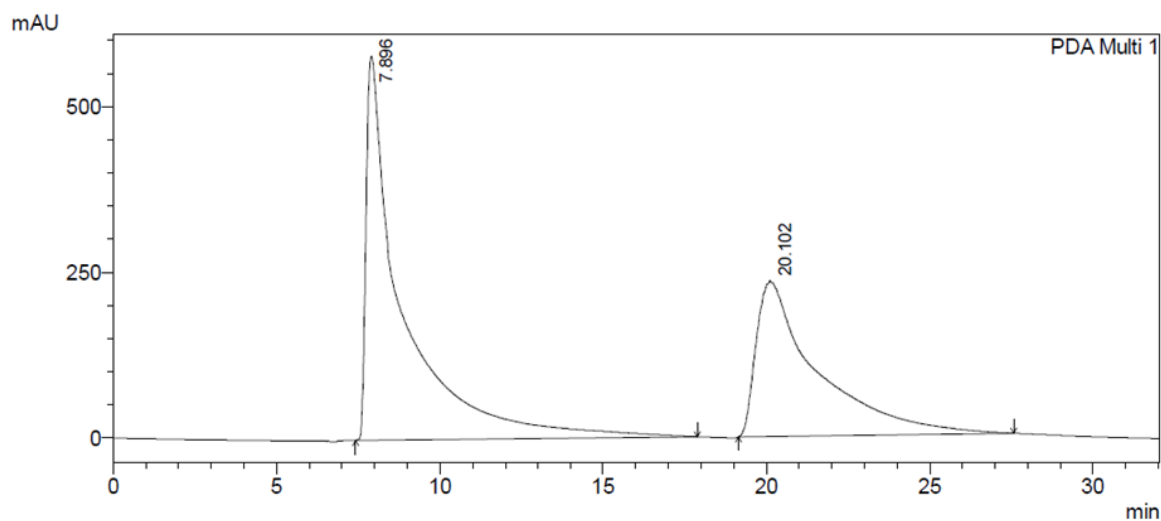

1 PDA Multi 1/254nm 4nm

PeakTable

PDA Ch1 254nm 4nm

| Peak# | Ret. Time | Area     | Height | Area %  | Height % |
|-------|-----------|----------|--------|---------|----------|
| 1     | 7.896     | 44803061 | 579271 | 59.425  | 71.108   |
| 2     | 20.102    | 30591768 | 235366 | 40.575  | 28.892   |
| Total |           | 75394828 | 814637 | 100.000 | 100.000  |

**S 100: HPLC spectrum of 4a in the presence of CMPTCs (10b) and K<sup>t</sup>OBu/NaOCl at -10°C.**
